# Supplementary material
Source: MDPI journal article supplement (https://www.mdpi.com/2227-9717/9/11/2019)

# Supplementary Materials

## Synthesis of New 1-Aryl-2-(3,5-dimethylpyrazol-1-yl)ethanone Oxime Ether Derivatives and Investigation of their Cytotoxic Effects

Mehmet Abdullah Alagöz <sup>1</sup>, Arzu Karakurt <sup>1</sup>, Ceylan Hepokur <sup>2</sup>, Emine Şalva <sup>3</sup>, Tijen Önkol <sup>4</sup>, Mohammed M. Ghoneim <sup>5</sup>, Mohamed A. Abdelgawad <sup>6</sup>, Ahmed Khames <sup>7</sup>, Hoon Kim <sup>8,\*</sup> and Bijo Mathew <sup>9,\*</sup>

<sup>1</sup>Department of Pharmaceutical Chemistry, Faculty of Pharmacy, Inonu University, Malatya, 44280, Turkey

<sup>2</sup>Department of Basic Pharmaceutical Sciences, Faculty of Pharmacy, Sivas Cumhuriyet University, Sivas, 58100, Turkey

<sup>3</sup>Department of Pharmaceutical Biotechnology, Faculty of Pharmacy, Inonu University, Malatya, 44280, Turkey

<sup>4</sup>Department of Pharmacy, Faculty of Pharmacy, Gazi University, Ankara, 06100, Turkey

<sup>5</sup>Department of Pharmacy Practice, Faculty of Pharmacy, AlMaarefa University, Ad Diriyah 13713, Saudi Arabia.

<sup>6</sup>Department of Pharmaceutical Chemistry, College of Pharmacy, Jouf University, Sakaka, Al Jouf 72341, Saudi Arabia.

<sup>7</sup>Department of Pharmaceutics and Industrial Pharmacy, College of Pharmacy, Taif University, P.O.Box:11099, Taif 21944, Saudi Arabia.

<sup>8</sup>Department of Pharmacy, and Research Institute of Life Pharmaceutical Sciences, Suncheon National University, Suncheon 57922, Republic of Korea.

<sup>9</sup>Department of Pharmaceutical Chemistry, Amrita School of Pharmacy, Amrita Vishwa Vidyapeetham, AIMS Health Sciences Campus, Kochi-682 041, India.

\*Correspondence: hoon@sunchon.ac.kr (H.K.); bijomathew@aims.amrita.edu or bijovilaventgu@gmail.com (B.M.)

**Table S1**

% Viability findings of synthesized compounds in L929 cell line

|           | <b>10 <math>\mu</math>M</b> | <b>25 <math>\mu</math>M</b> | <b>50 <math>\mu</math>M</b> | <b>100 <math>\mu</math>M</b> |
|-----------|-----------------------------|-----------------------------|-----------------------------|------------------------------|
| <b>2a</b> | 79.46                       | 93.68                       | 94.88                       | 108.49                       |
| <b>3a</b> | 88.84                       | 99.30                       | 101.09                      | 110.39                       |
| <b>4a</b> | 83.41                       | 88.57                       | 86.63                       | 98.45                        |
| <b>5a</b> | 90.81                       | 95.66                       | 101.20                      | 96.24                        |
| <b>2b</b> | 88.10                       | 98.14                       | 103.72                      | 103.45                       |
| <b>3b</b> | 83.06                       | 94.77                       | 94.69                       | 99.65                        |
| <b>4b</b> | 72.52                       | 91.86                       | 96.32                       | 107.29                       |
| <b>5b</b> | 98.45                       | 101.01                      | 102.17                      | 115.74                       |
| <b>2c</b> | 94.92                       | 100.12                      | 96.47                       | 112.44                       |
| <b>3c</b> | 87.05                       | 93.95                       | 93.10                       | 104,30                       |
| <b>4c</b> | 92.52                       | 99.11                       | 101.47                      | 96.47                        |
| <b>5c</b> | 88.91                       | 91.74                       | 103.26                      | 91.36                        |
| <b>2d</b> | 86.47                       | 93.33                       | 79.84                       | 94.50                        |
| <b>3d</b> | 80.08                       | 92.33                       | 101.43                      | 105.31                       |
| <b>4d</b> | 90.93                       | 102.21                      | 101.40                      | 100.97                       |
| <b>5d</b> | 83.99                       | 92.67                       | 97.02                       | 91.32                        |
| <b>2e</b> | 94.77                       | 88.84                       | 98.37                       | 92.52                        |
| <b>3e</b> | 99.03                       | 90.70                       | 104.92                      | 98.84                        |
| <b>4e</b> | 91.47                       | 84.03                       | 84.07                       | 93.45                        |
| <b>5e</b> | 83.72                       | 95.27                       | 98.18                       | 95.74                        |
| <b>2f</b> | 93.80                       | 100.43                      | 105.58                      | 107.98                       |
| <b>3f</b> | 94.07                       | 100.58                      | 106.20                      | 105.19                       |
| <b>4f</b> | 90.23                       | 92.91                       | 94.50                       | 97.48                        |
| <b>5f</b> | 99.30                       | 99.07                       | 94.92                       | 95.58                        |

**Supplementary Figures (Data 1~72).**  $^1\text{H}$ -NMR,  $^{13}\text{C}$ -NMR, and Mass spectra of the compounds tested

**Data 1.**  $^1\text{H}$ -NMR spectrum of compound 2a

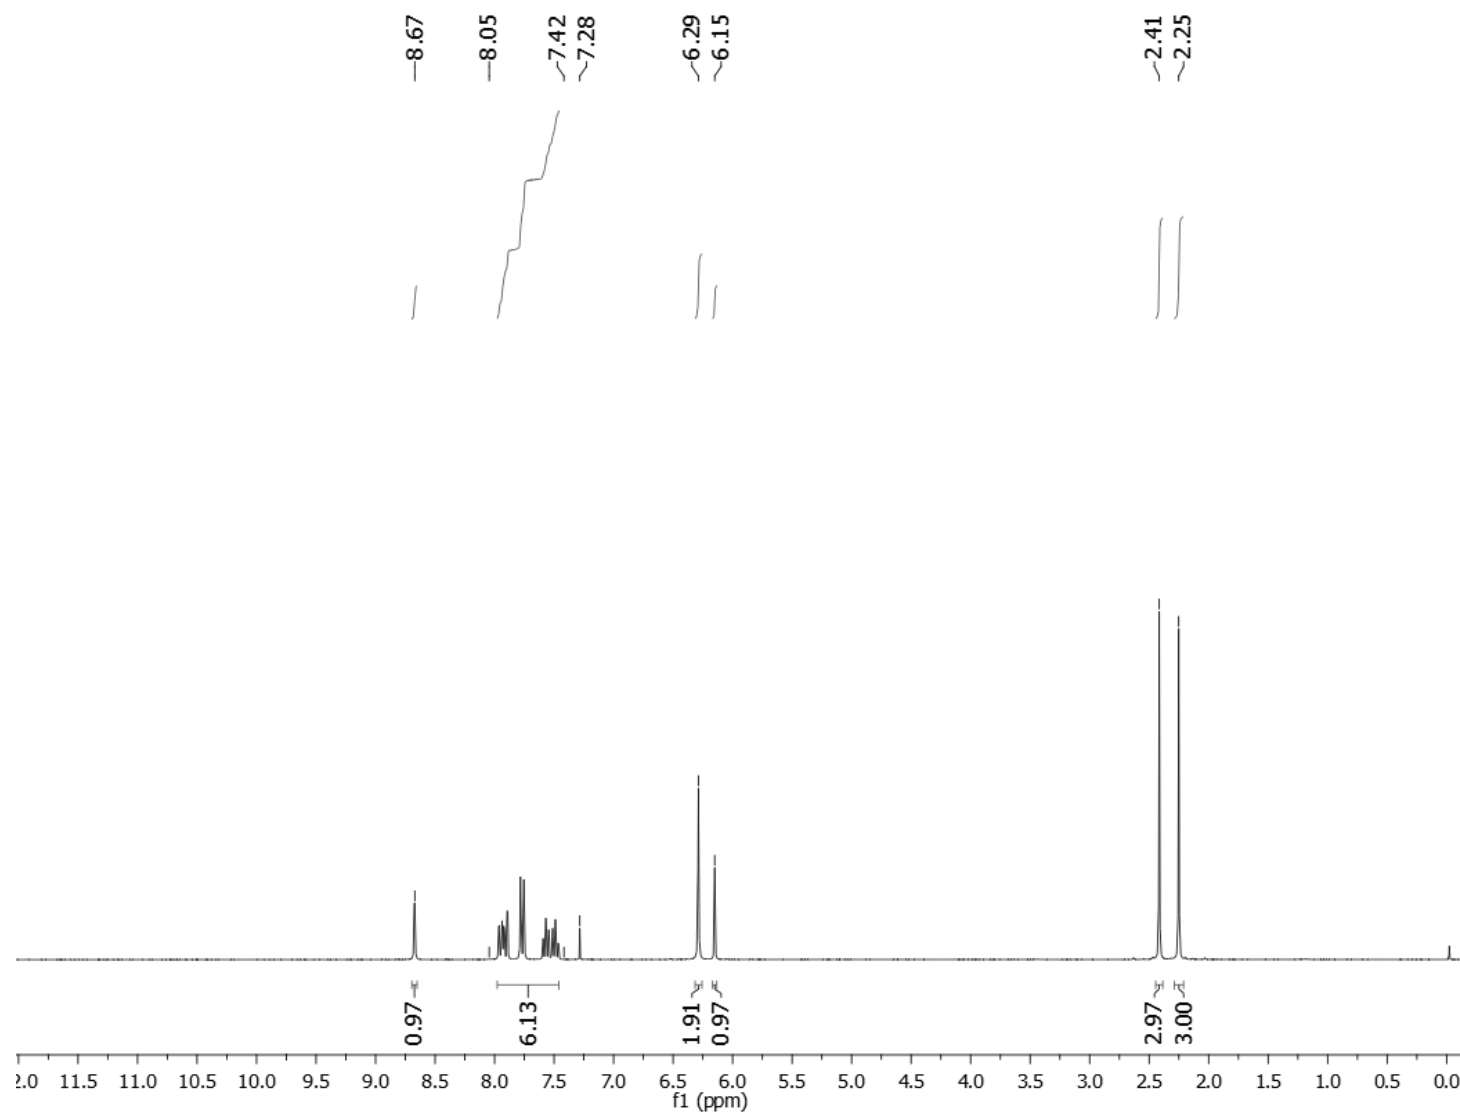

**Data 2.**  $^{13}\text{C}$ -NMR spectrum of compound 2a

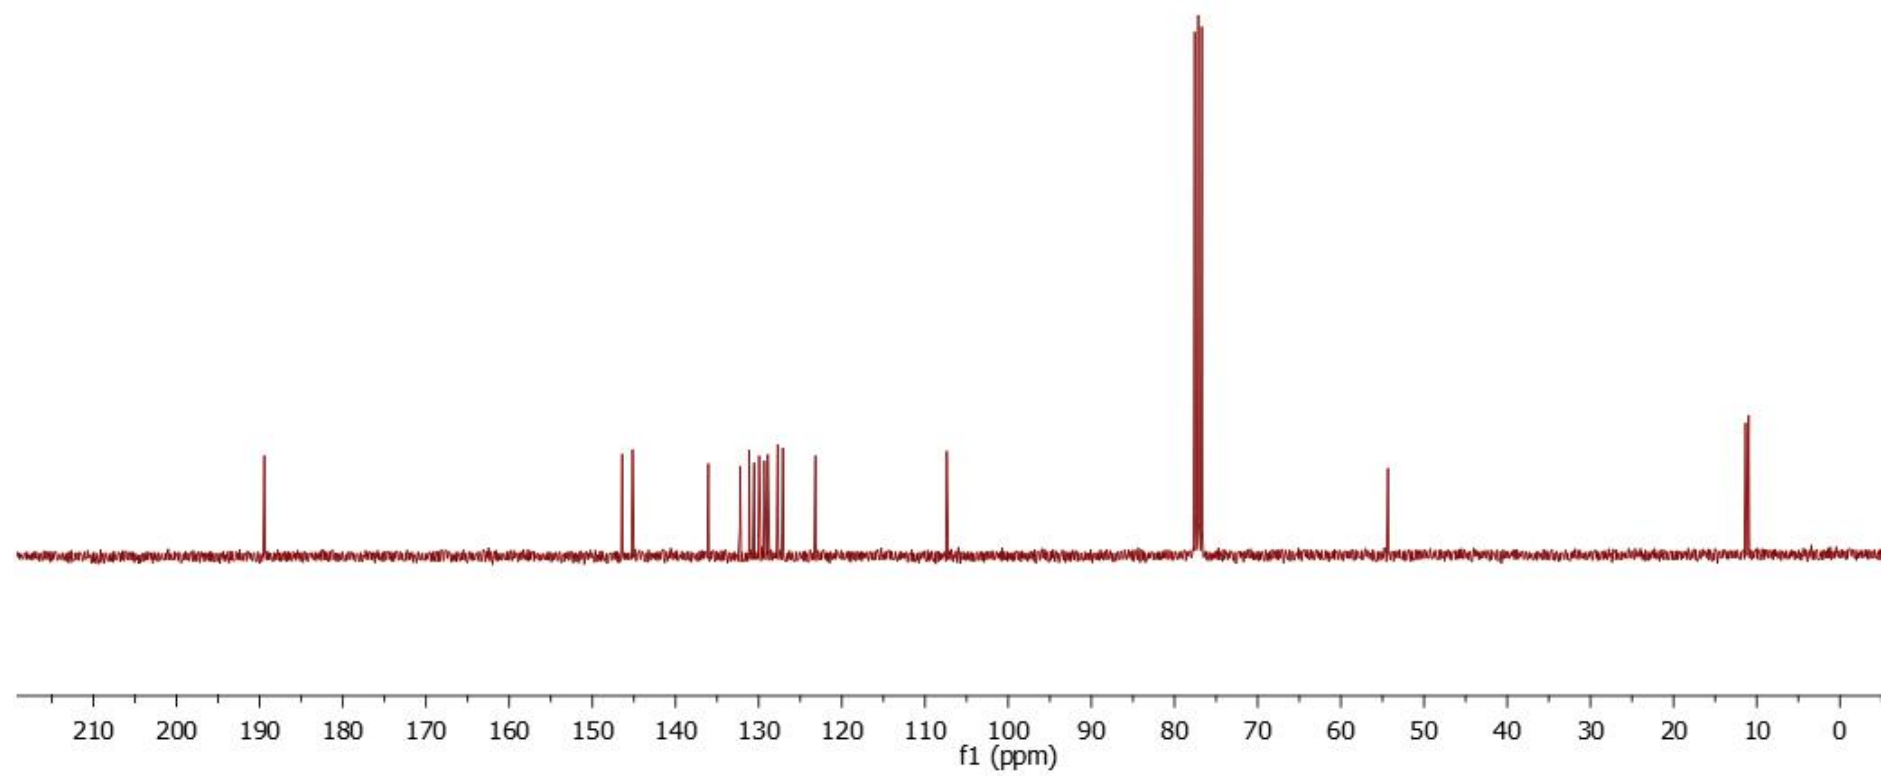

**Data 3. Mass spectrum of compound 2a**

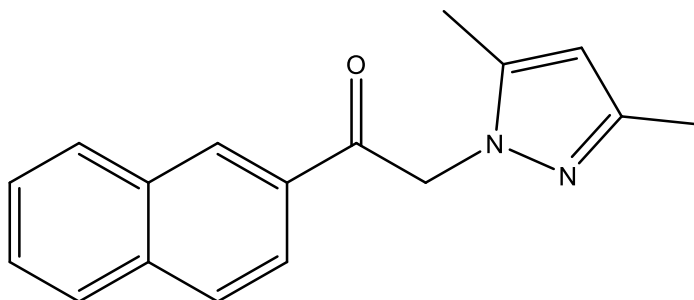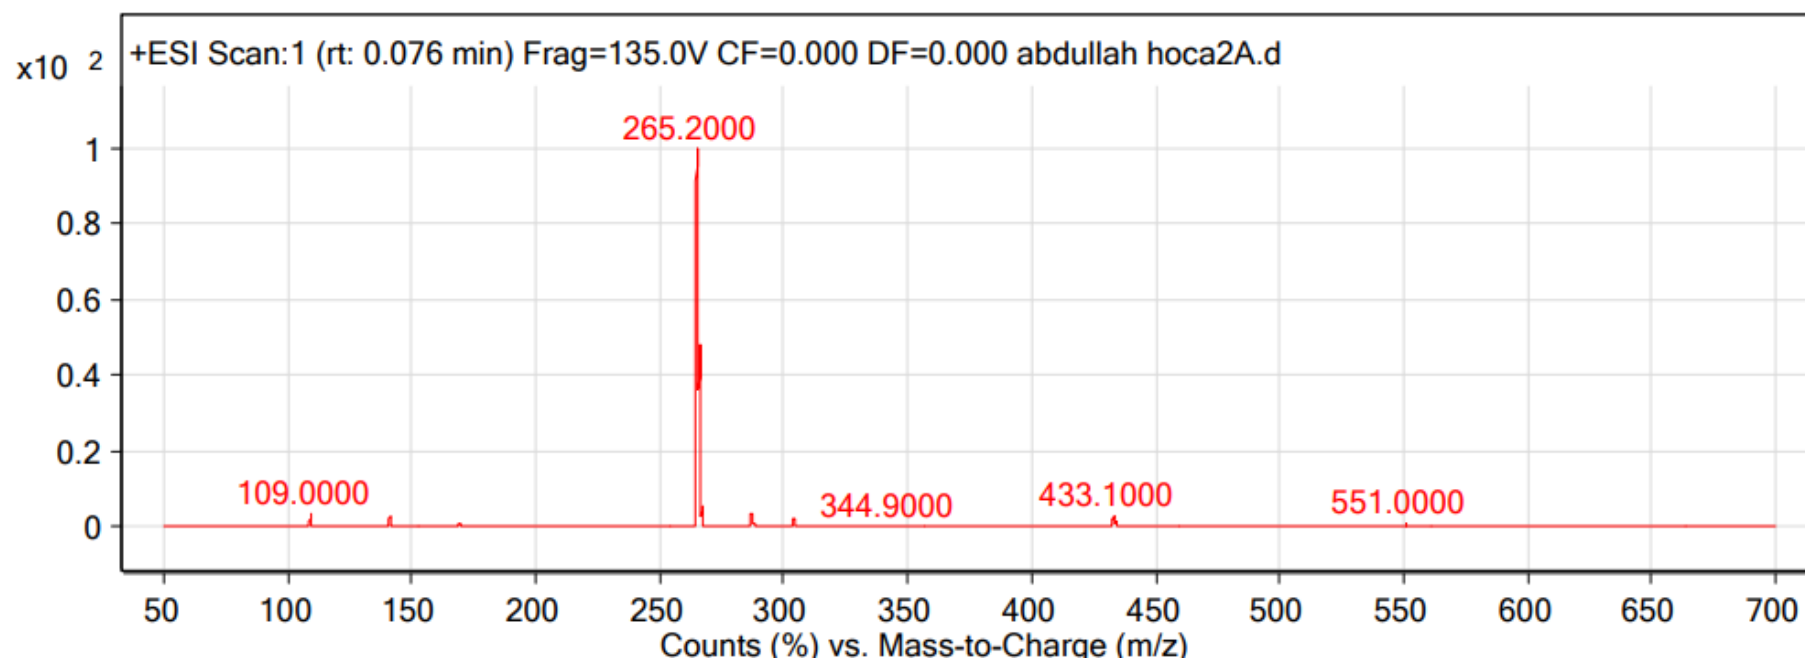

**Data 4.**  $^1\text{H}$ -NMR spectrum of compound 2b

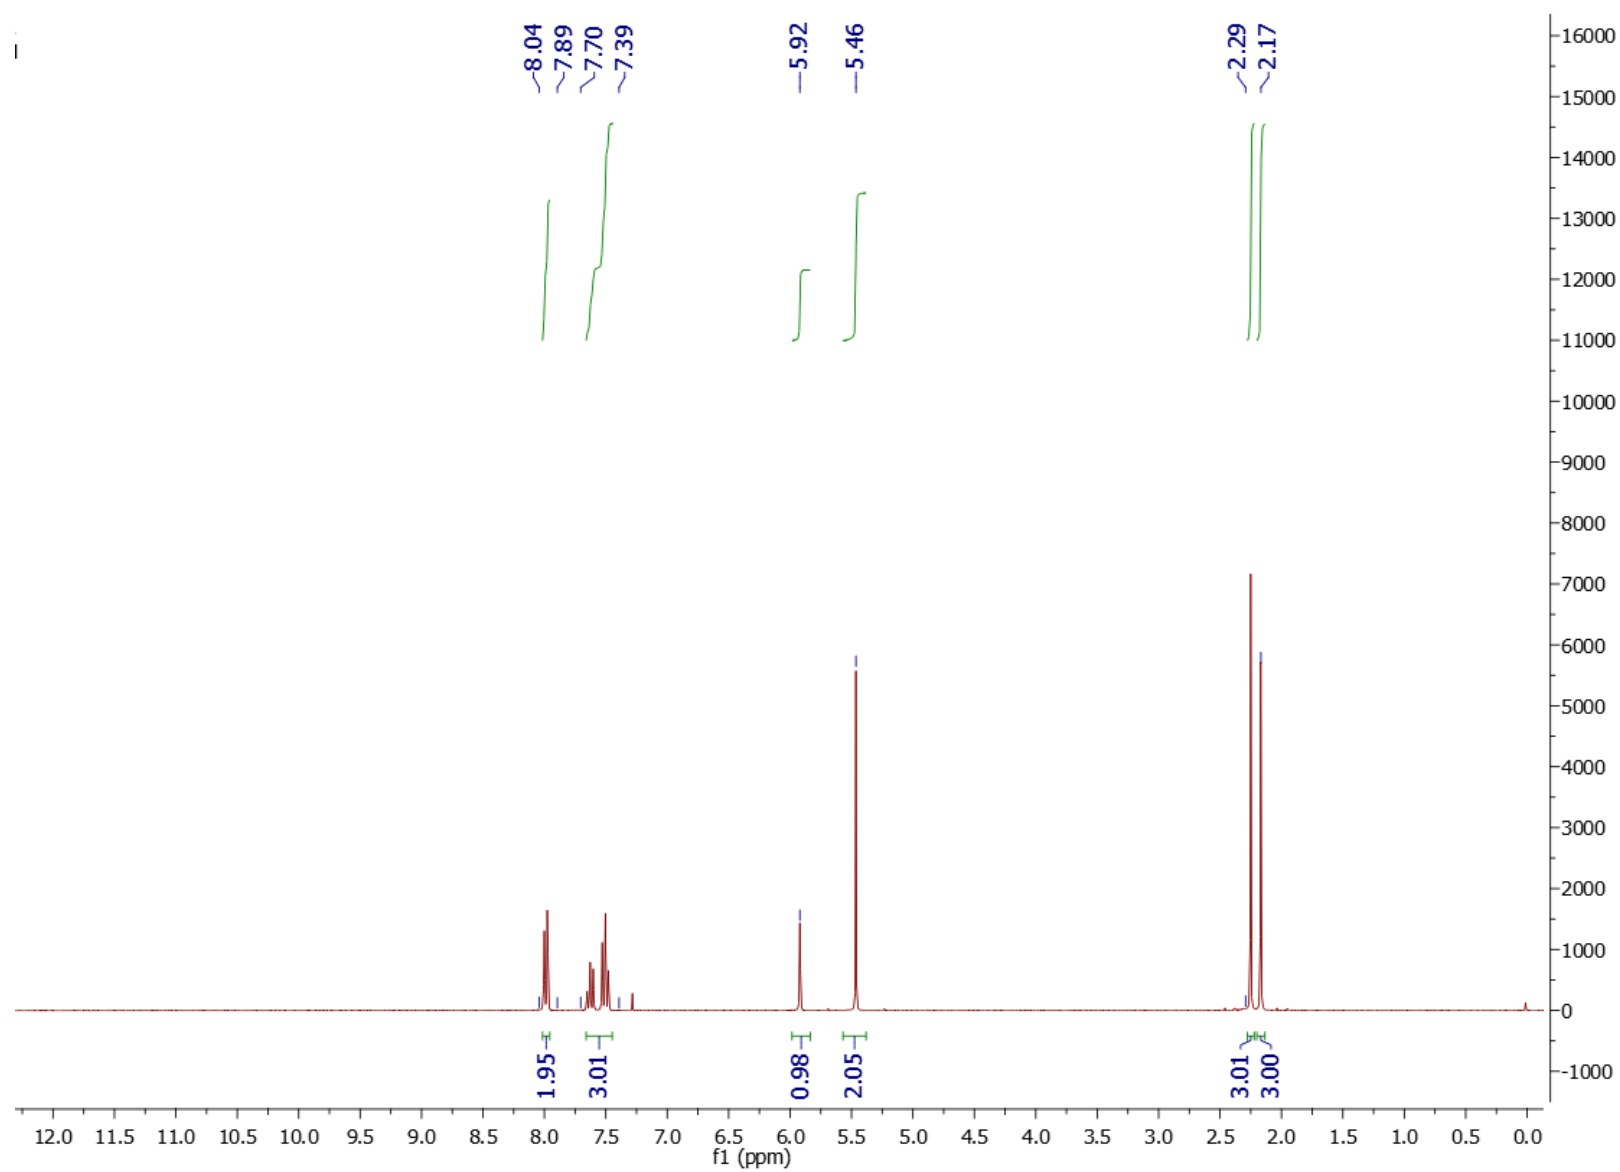

**Data 5.**  $^{13}\text{C}$ -NMR spectrum of compound 2b

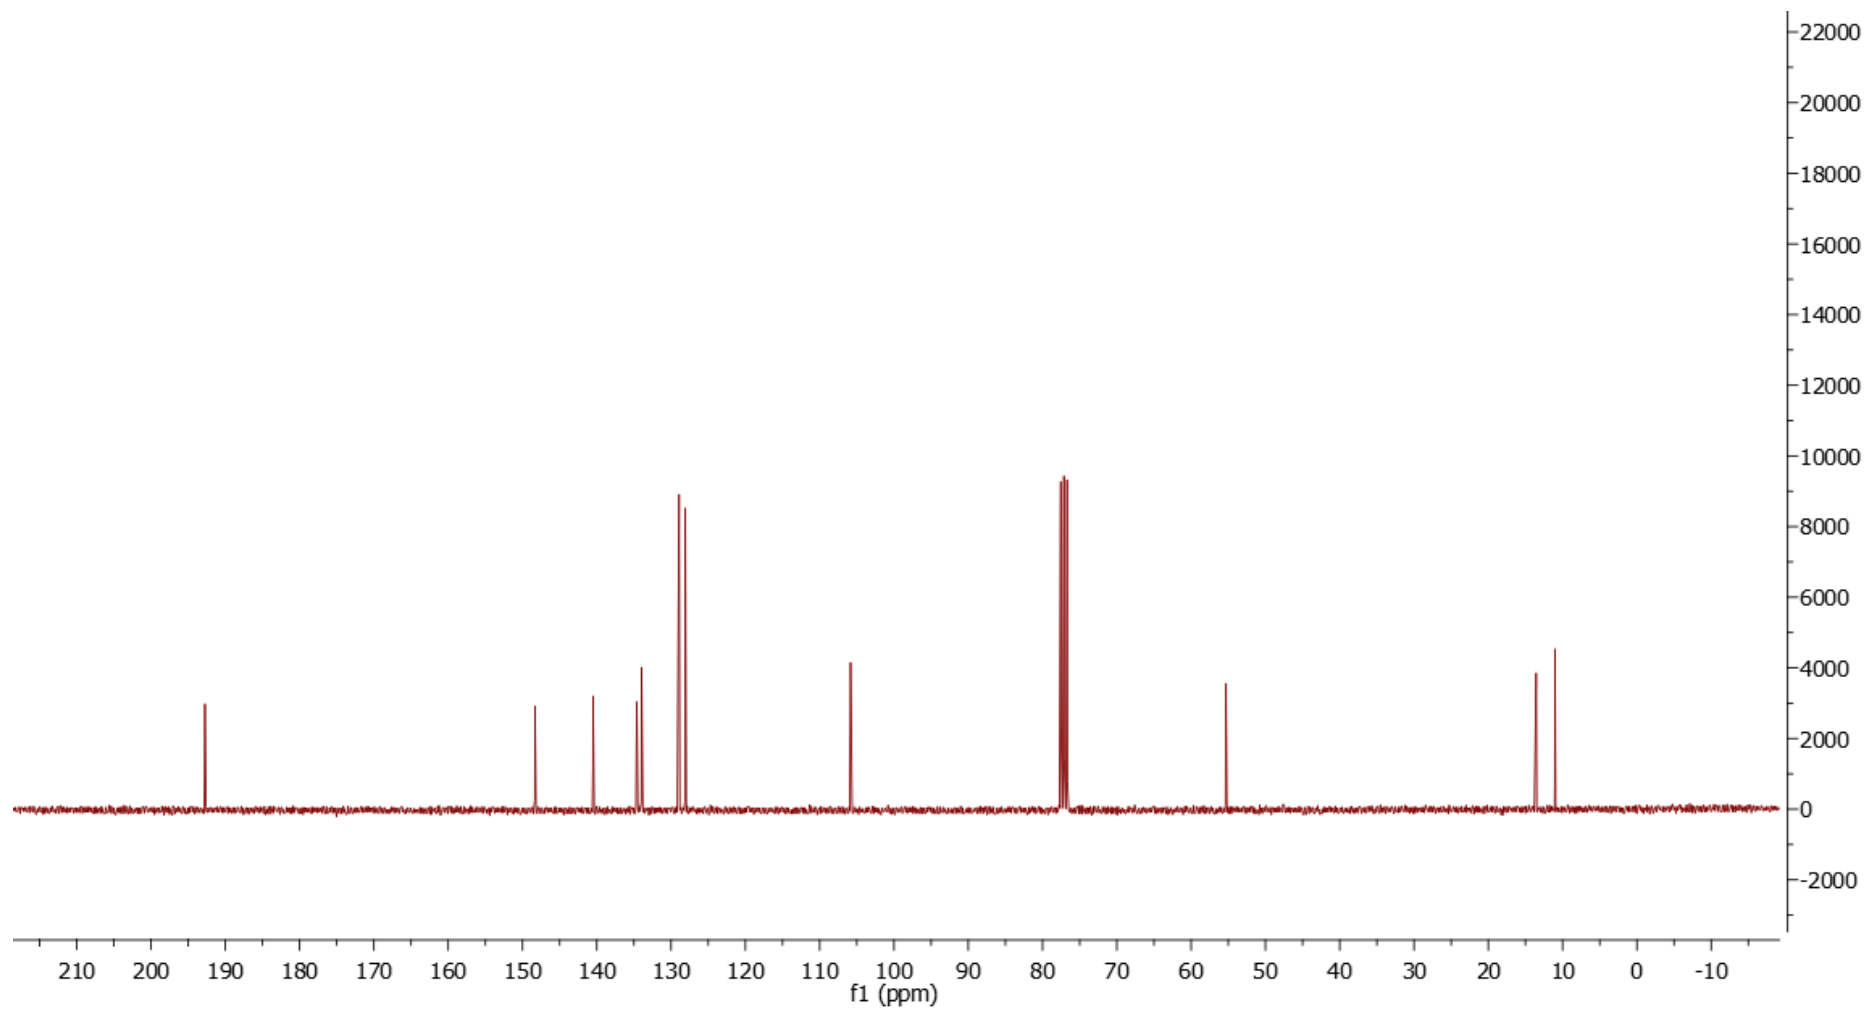

**Data 6. Mass spectrum of compound 2b**

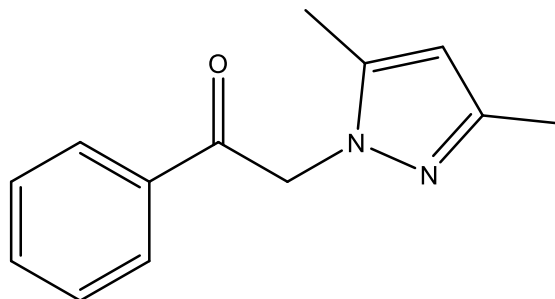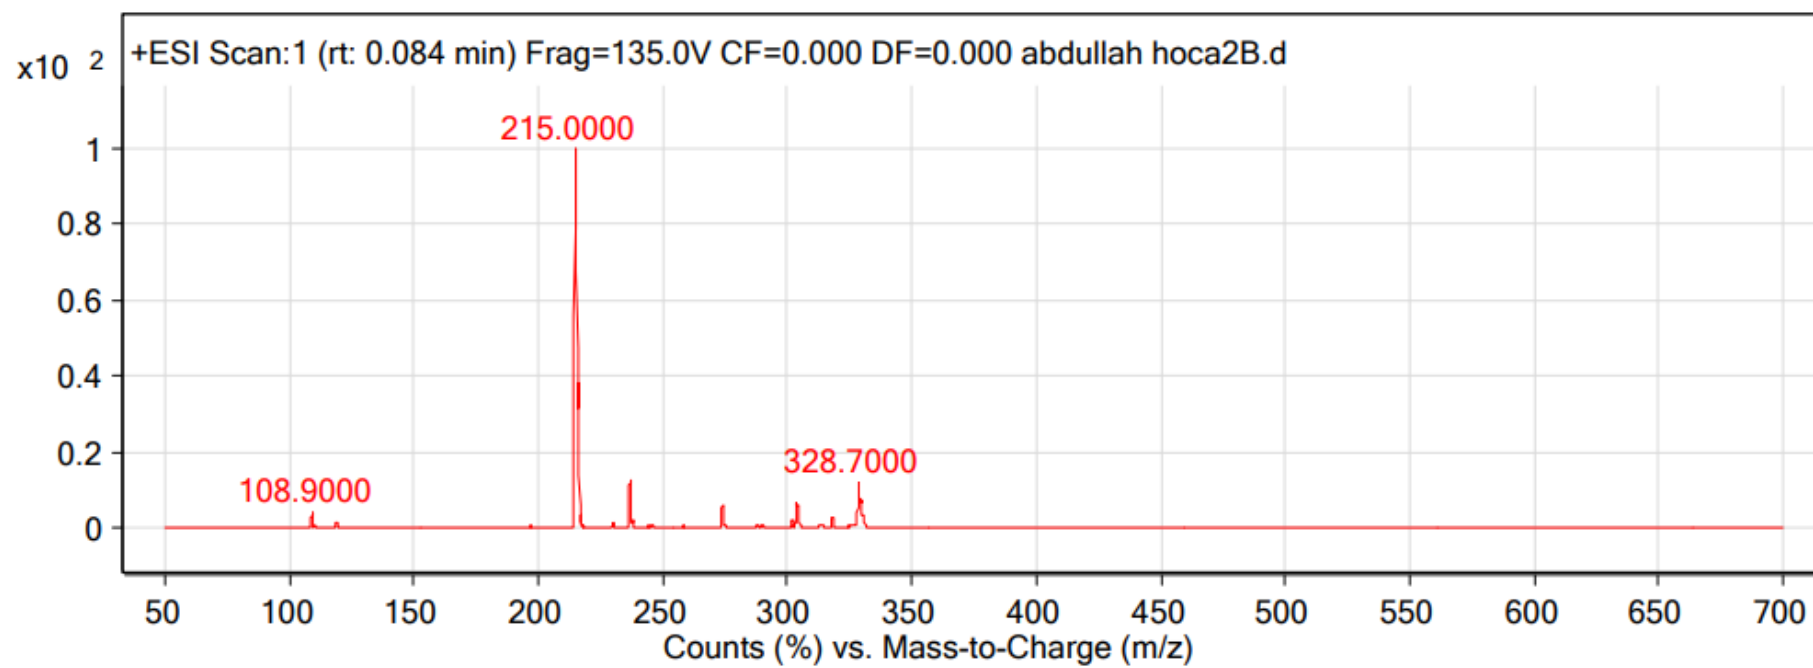



**Data 7.  $^1\text{H}$ -NMR spectrum of compound 2c**

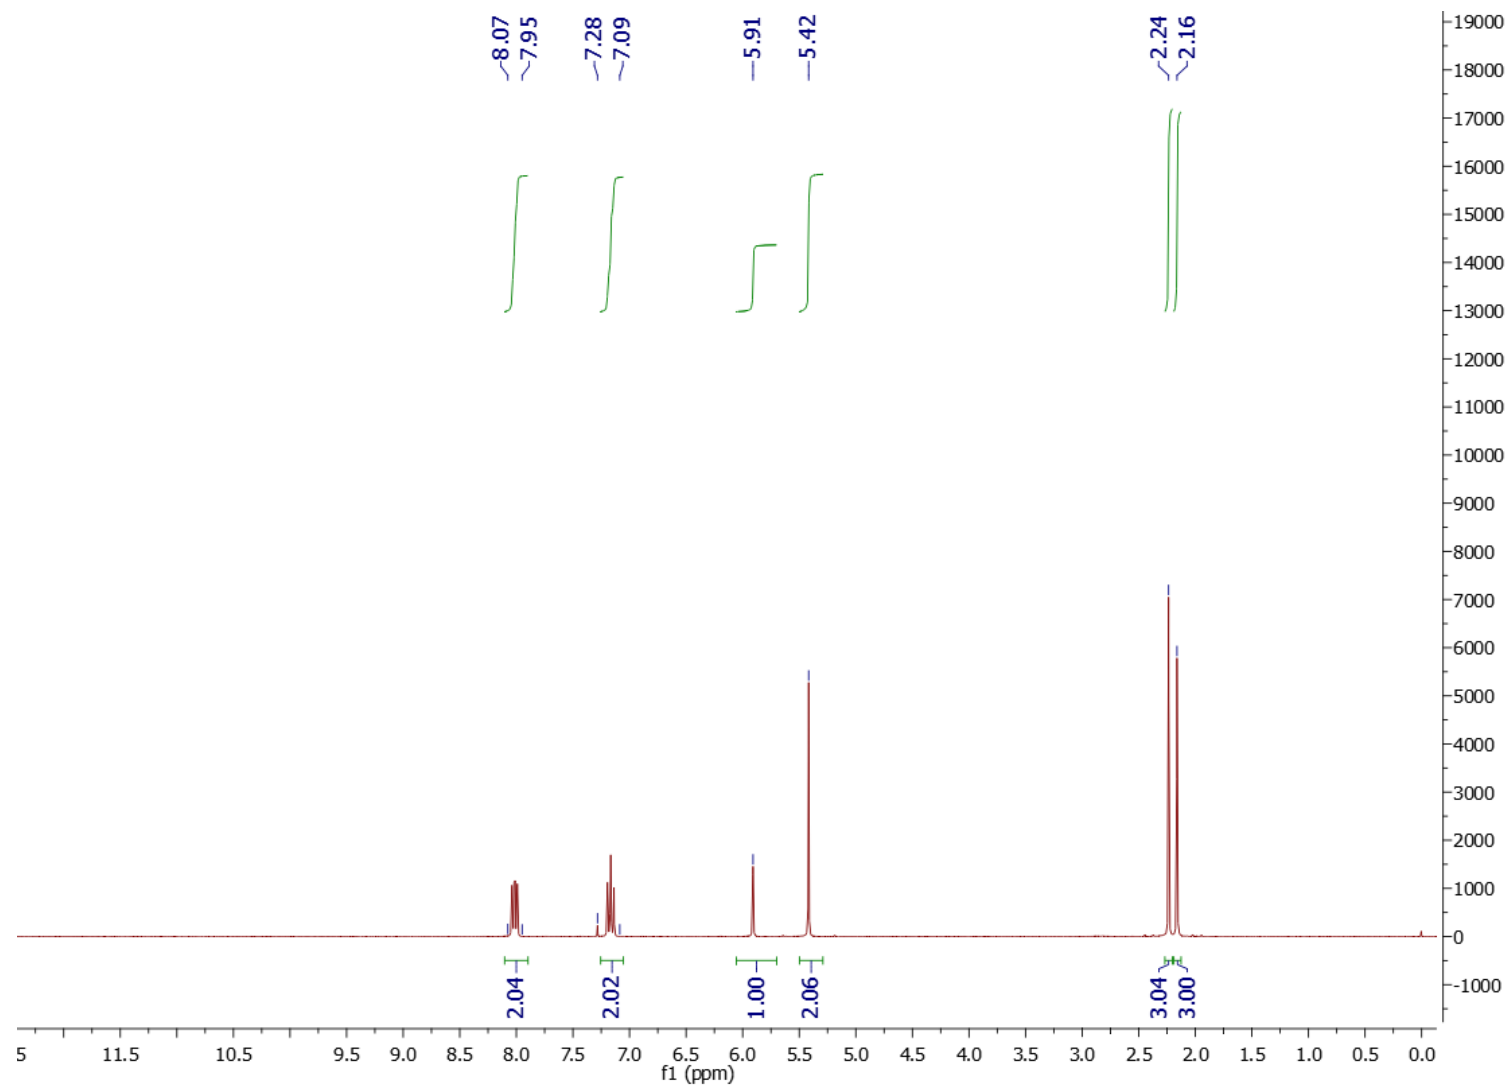

**Data 8.**  $^{13}\text{C}$ -NMR spectrum of compound **2c**

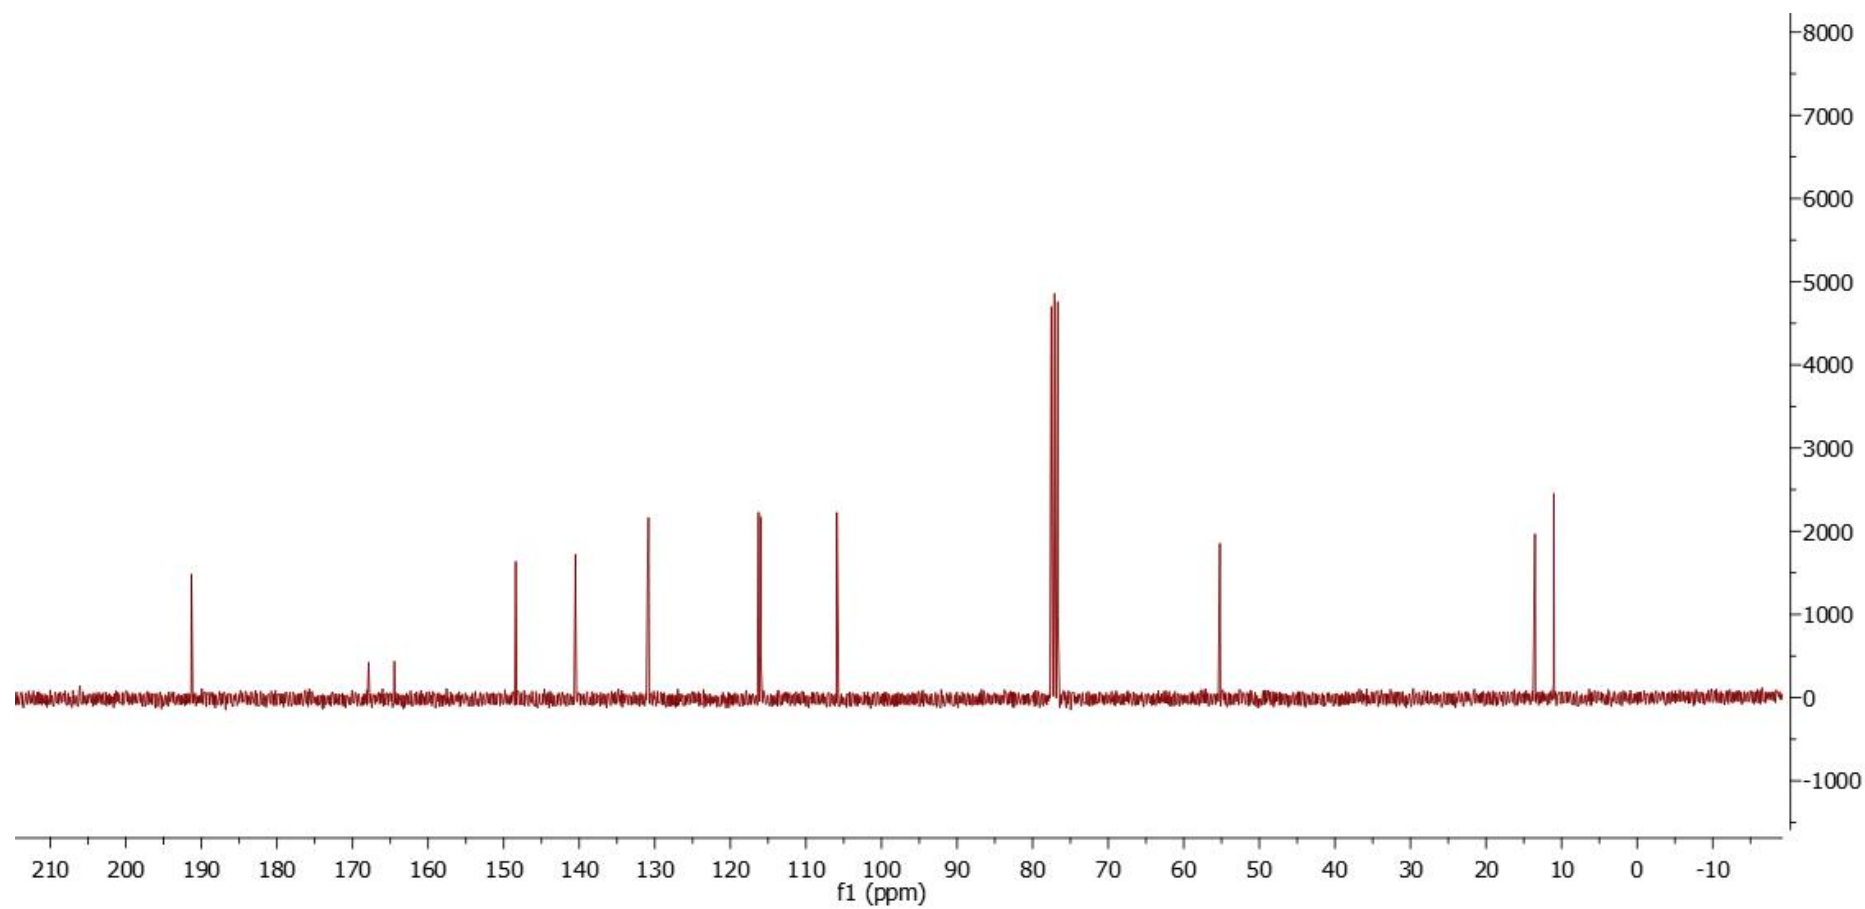

**Data 9. Mass spectrum of compound 2c**

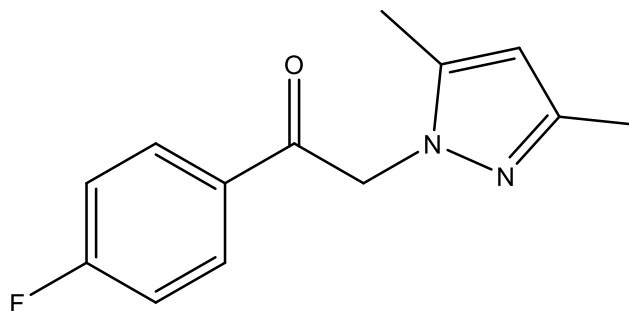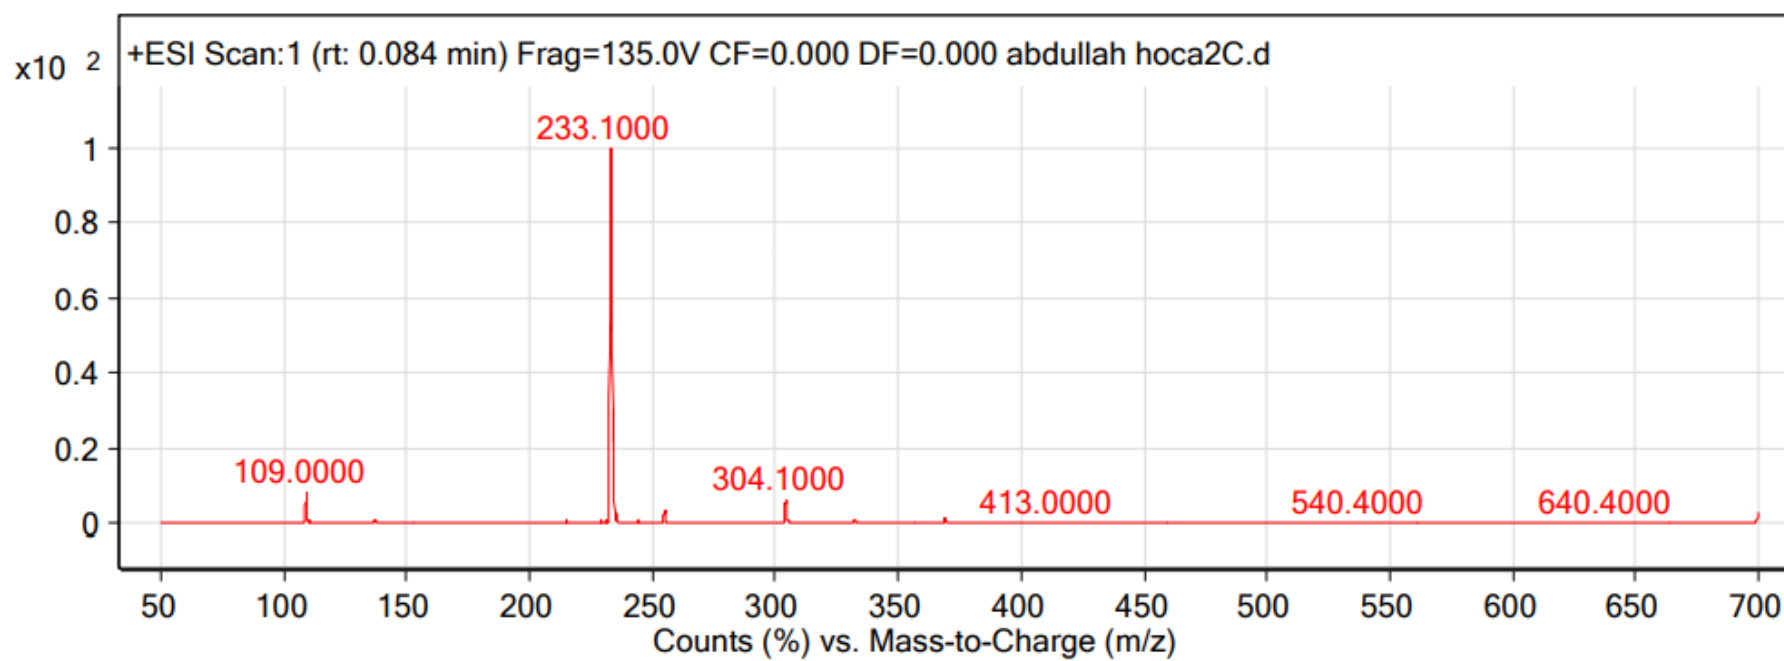

**Data 10.  $^1\text{H}$ -NMR spectrum of compound 2d**

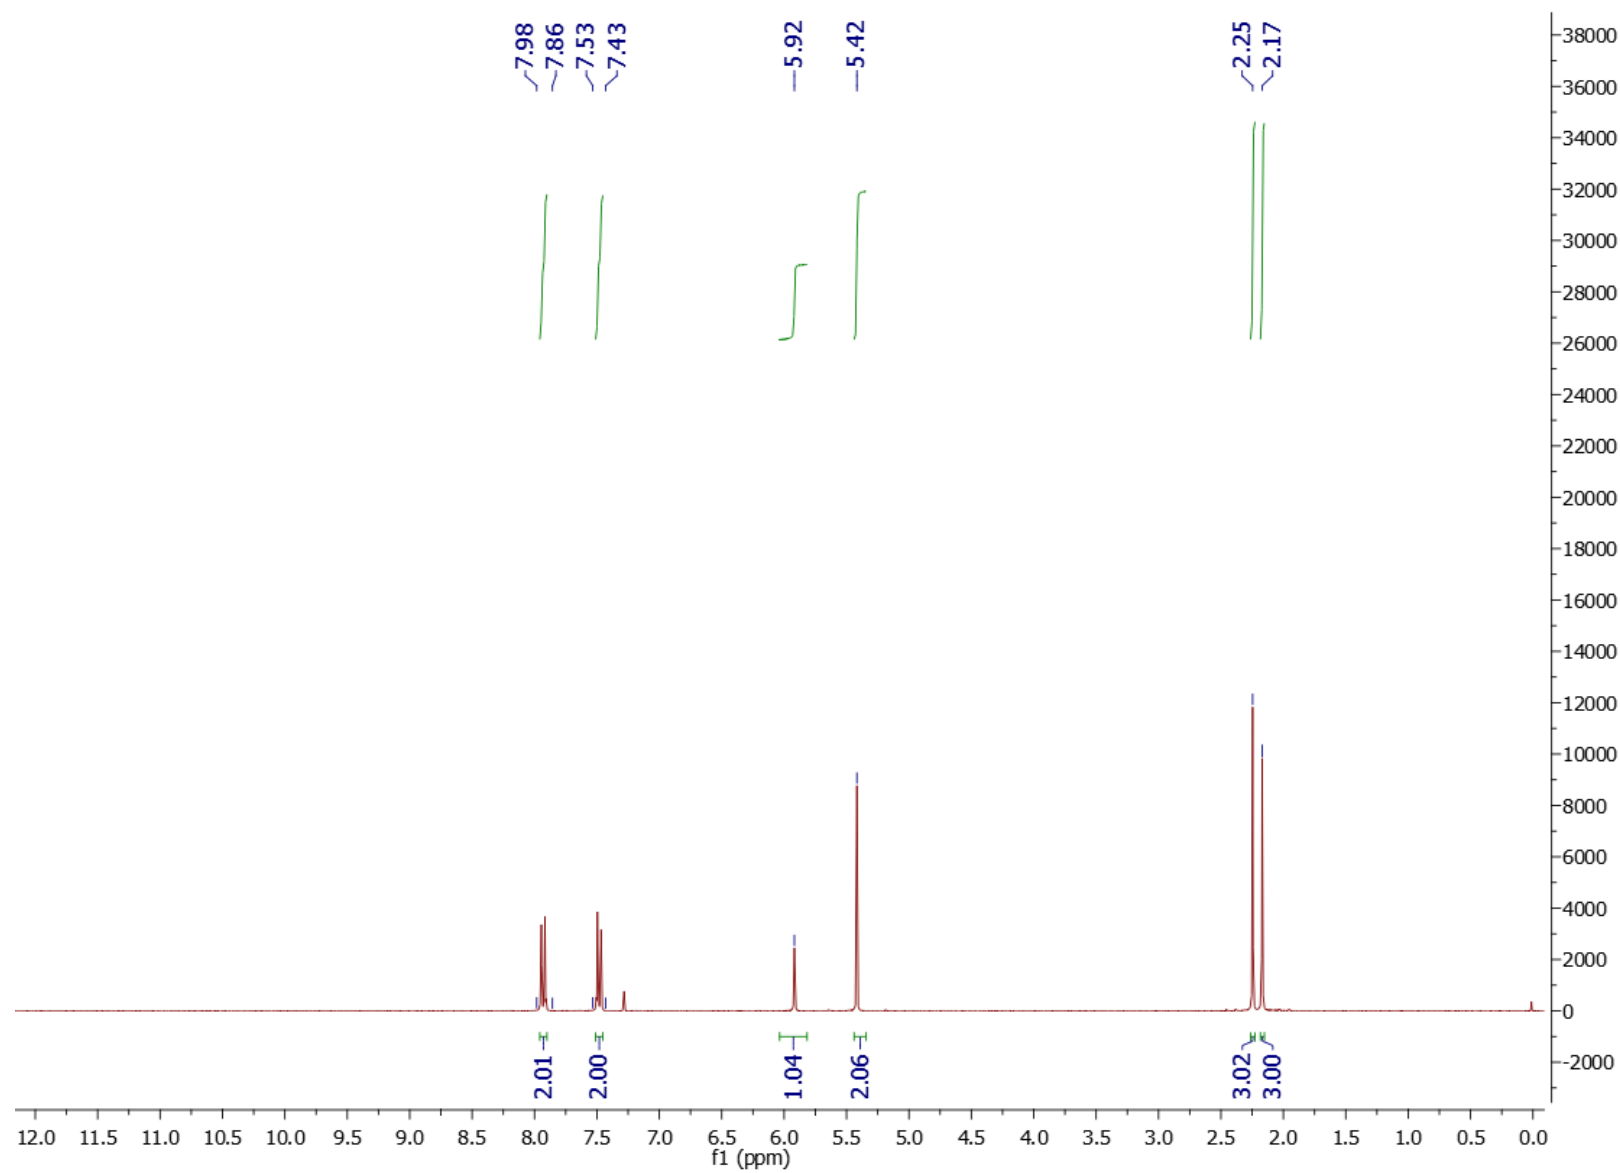

**Data 11.**  $^{13}\text{C}$ -NMR spectrum of compound 2d

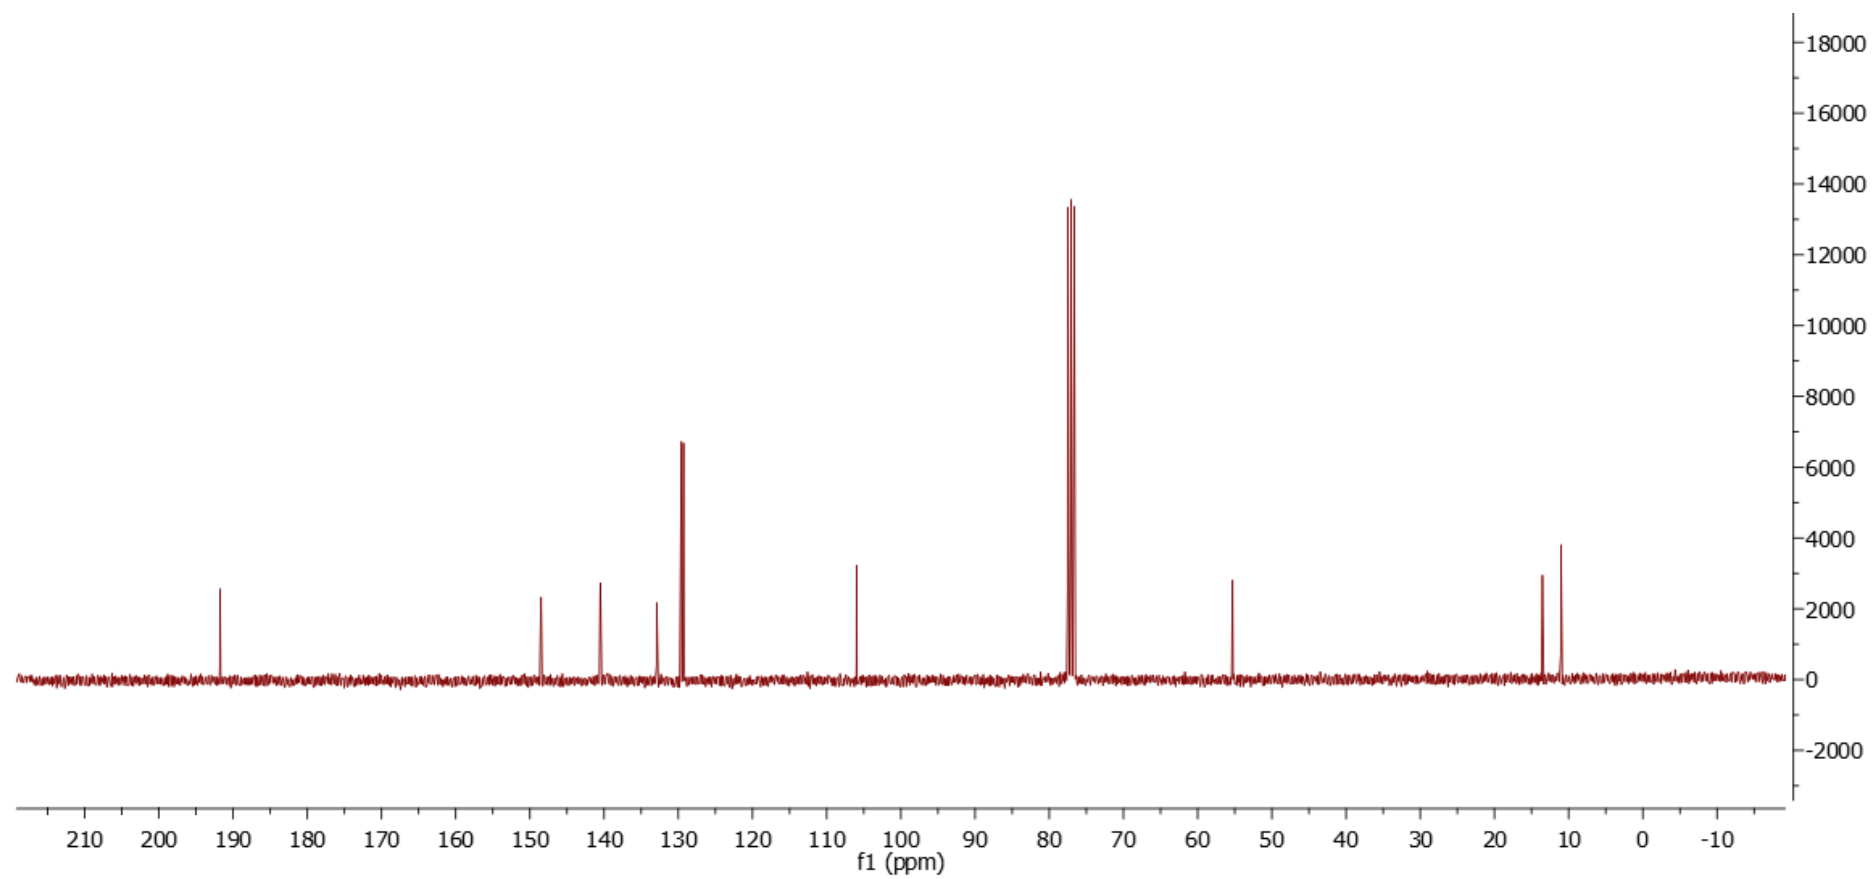

**Data 12. Mass spectrum of compound 2d**

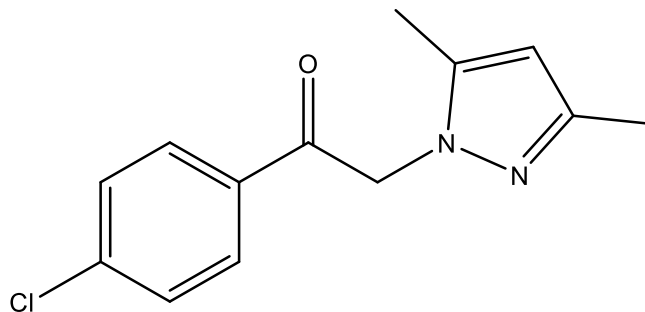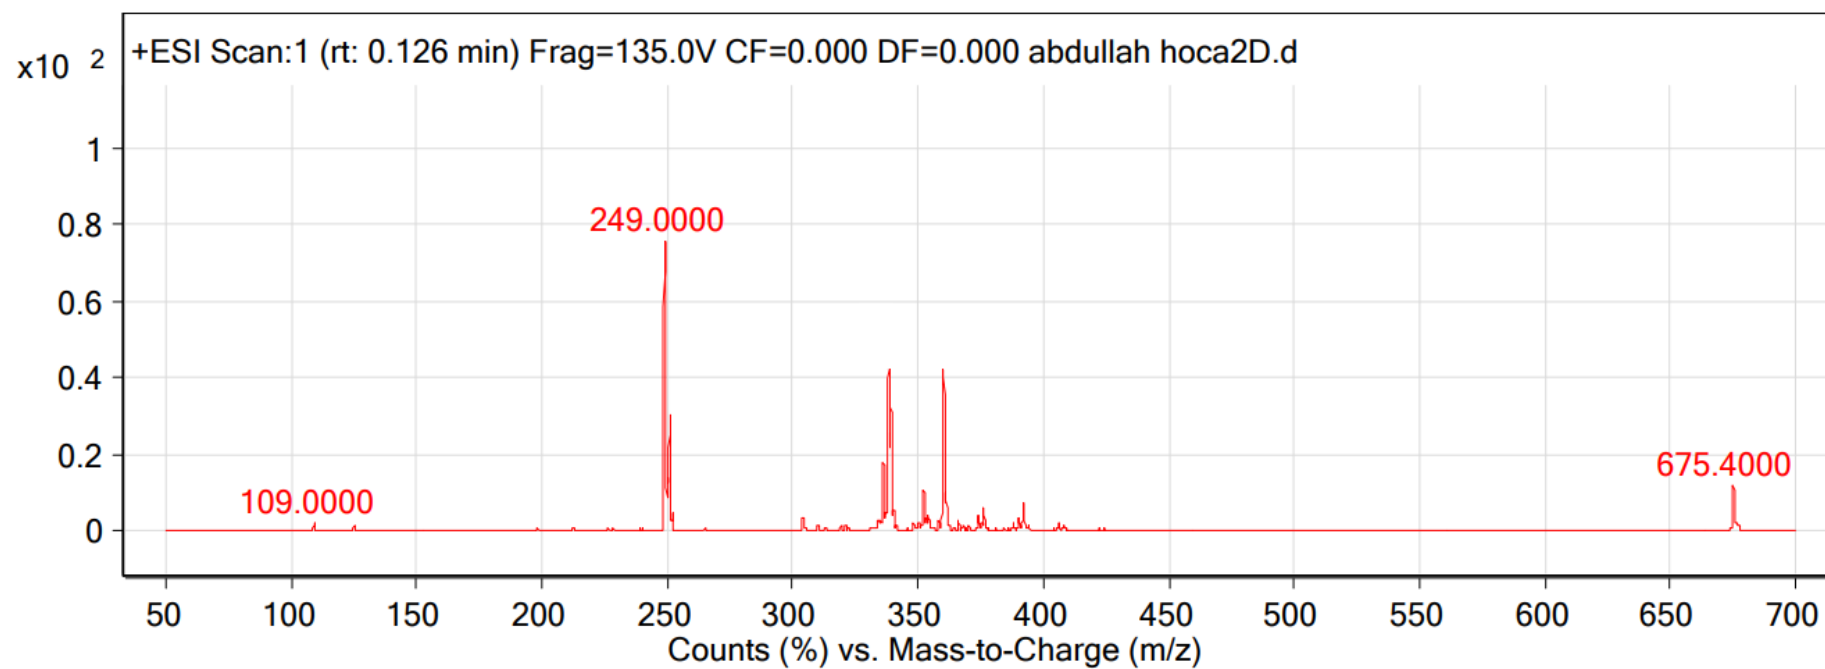

**Data 13.**  $^1\text{H}$ -NMR spectrum of compound 2e

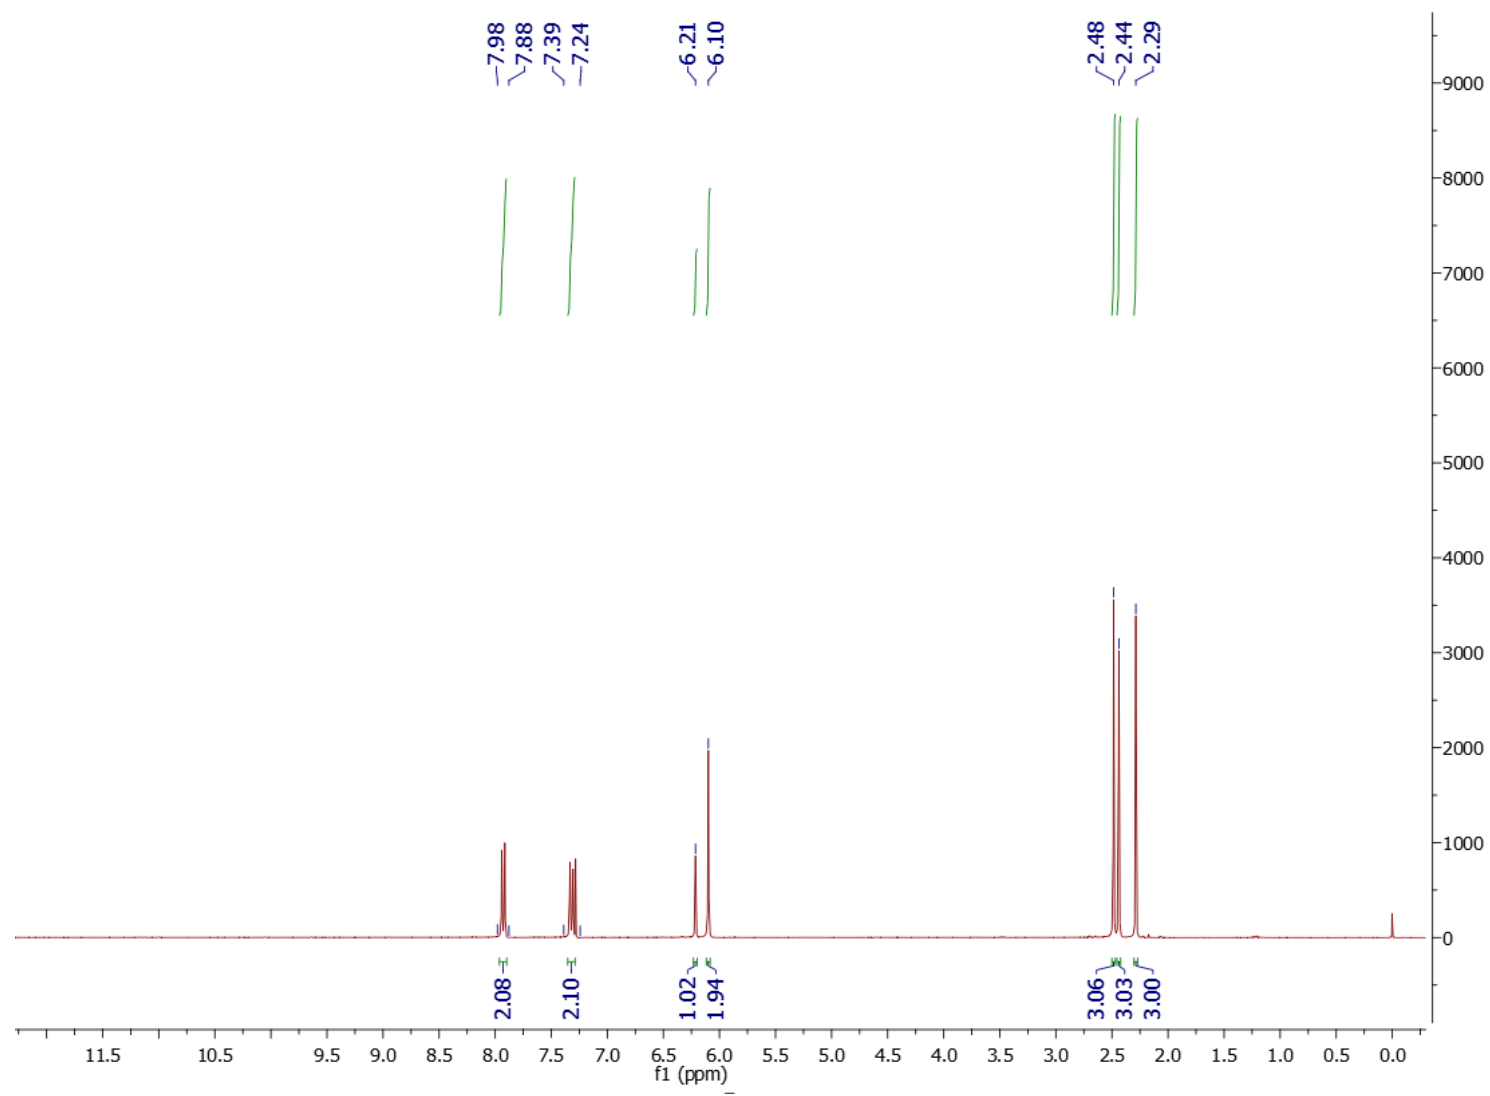

**Data 14.**  $^{13}\text{C}$ -NMR spectrum of compound 2e

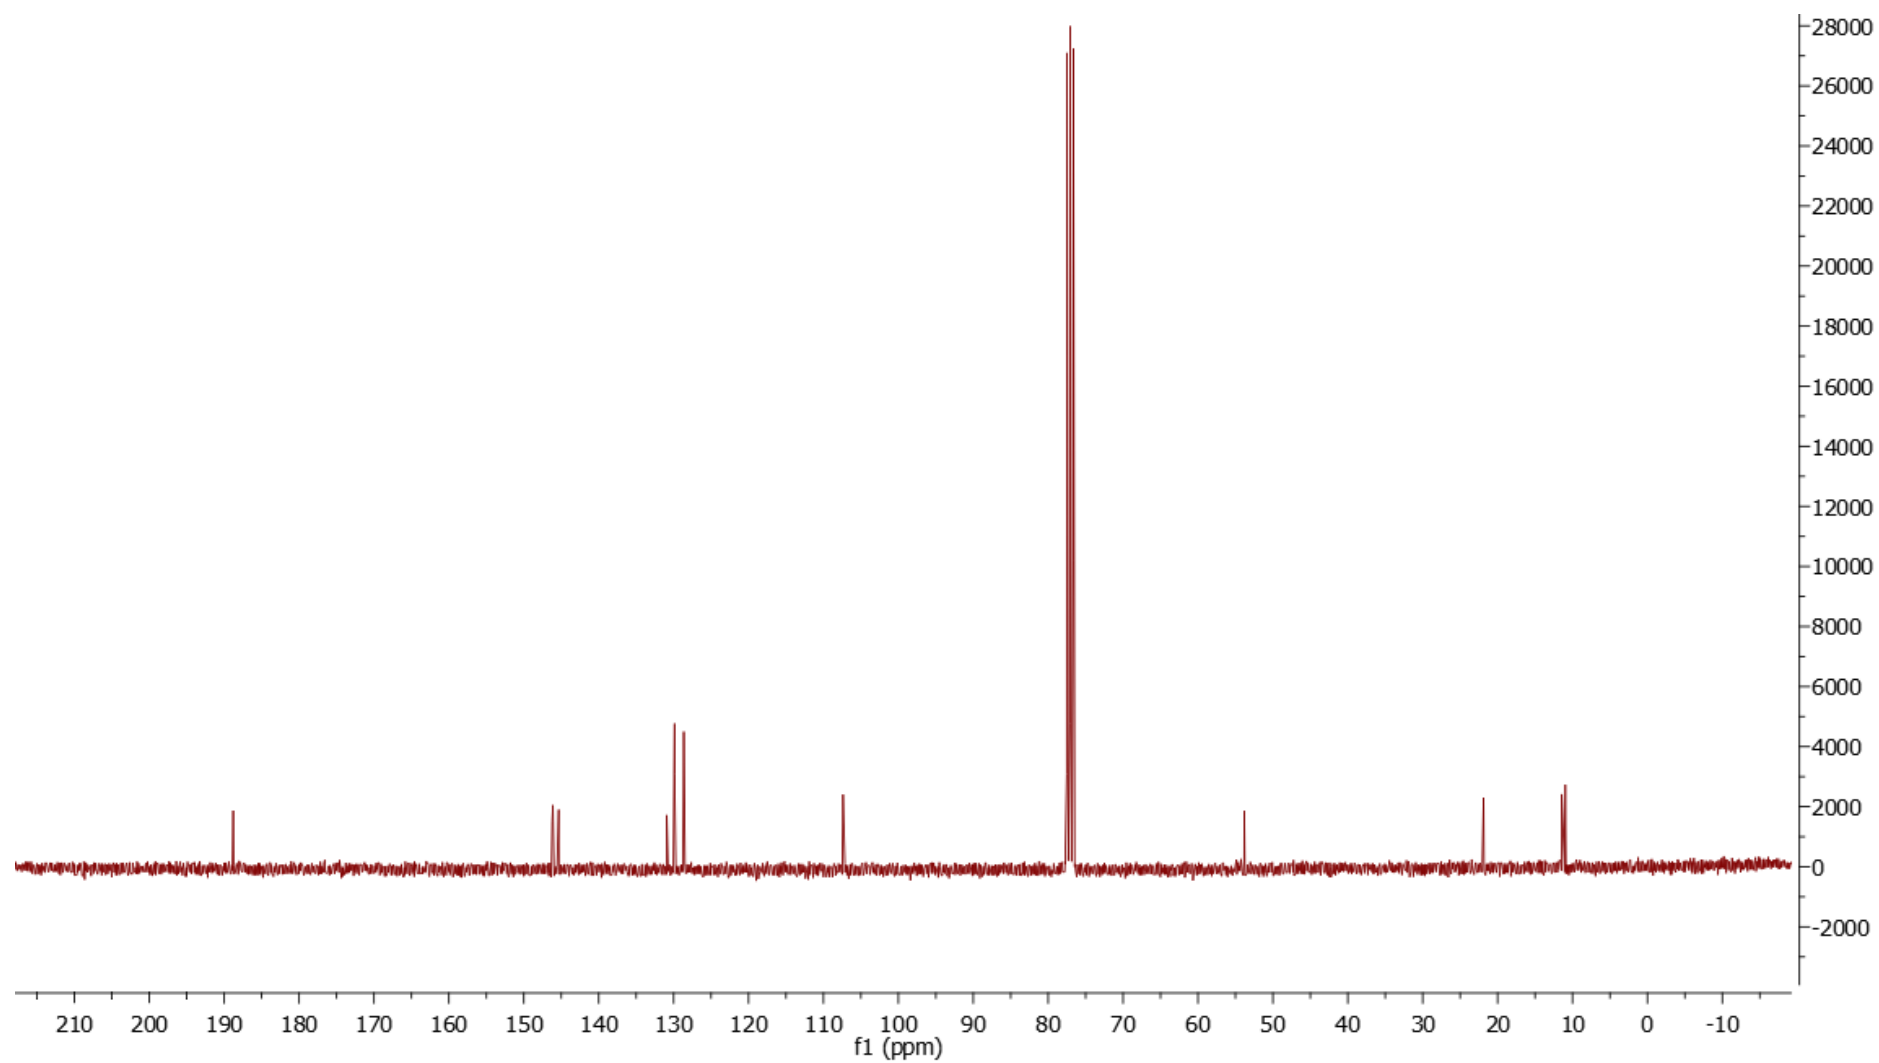



**Data 15. Mass spectrum of compound 2e**

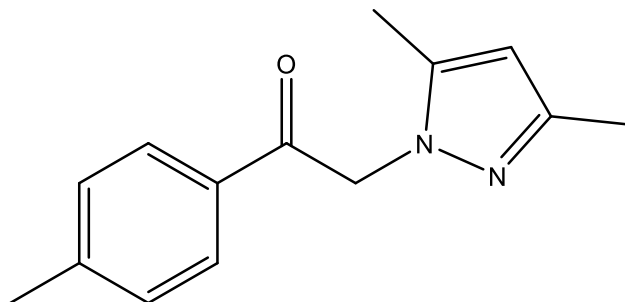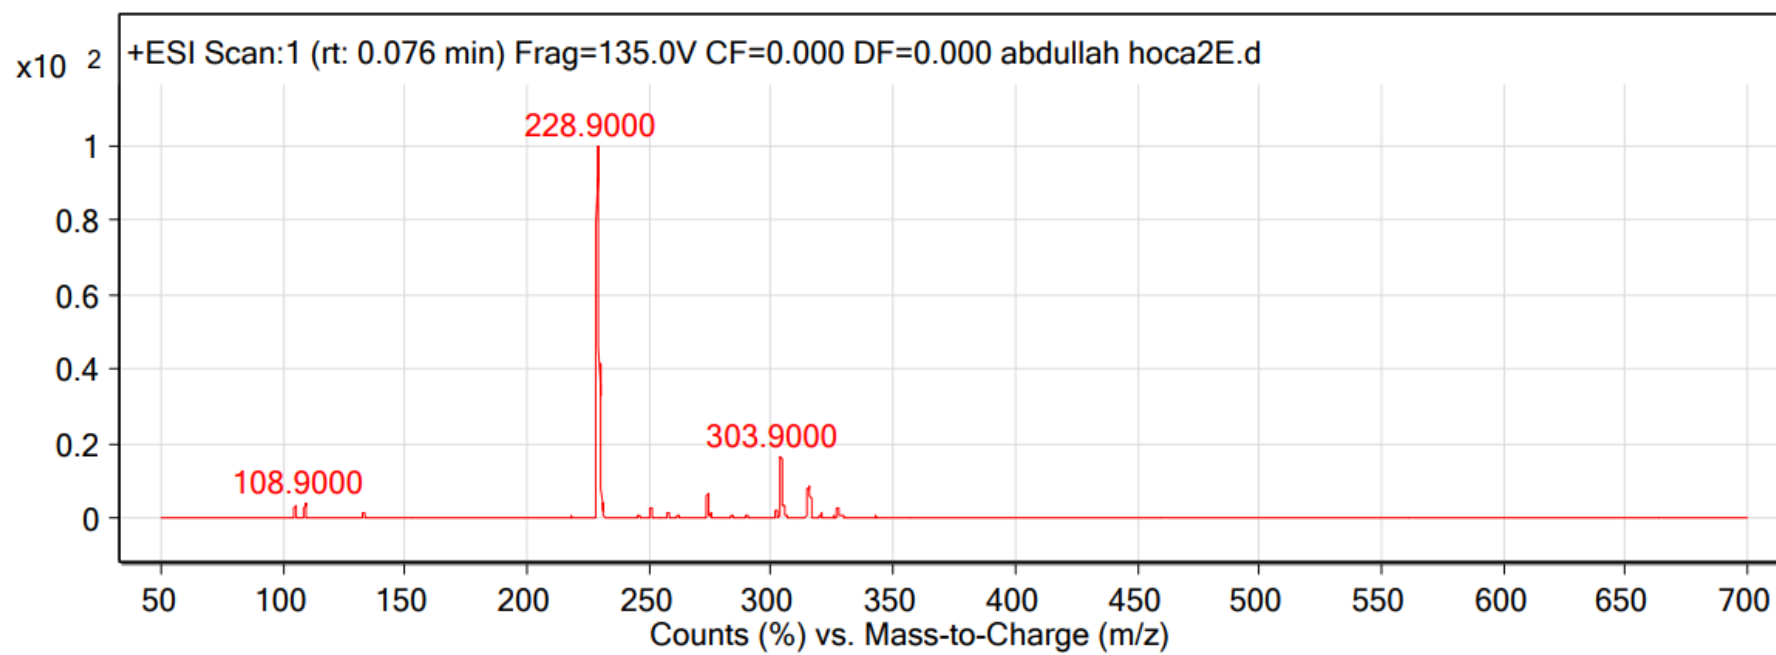

**Data 16.  $^1\text{H}$ -NMR spectrum of compound 2f**

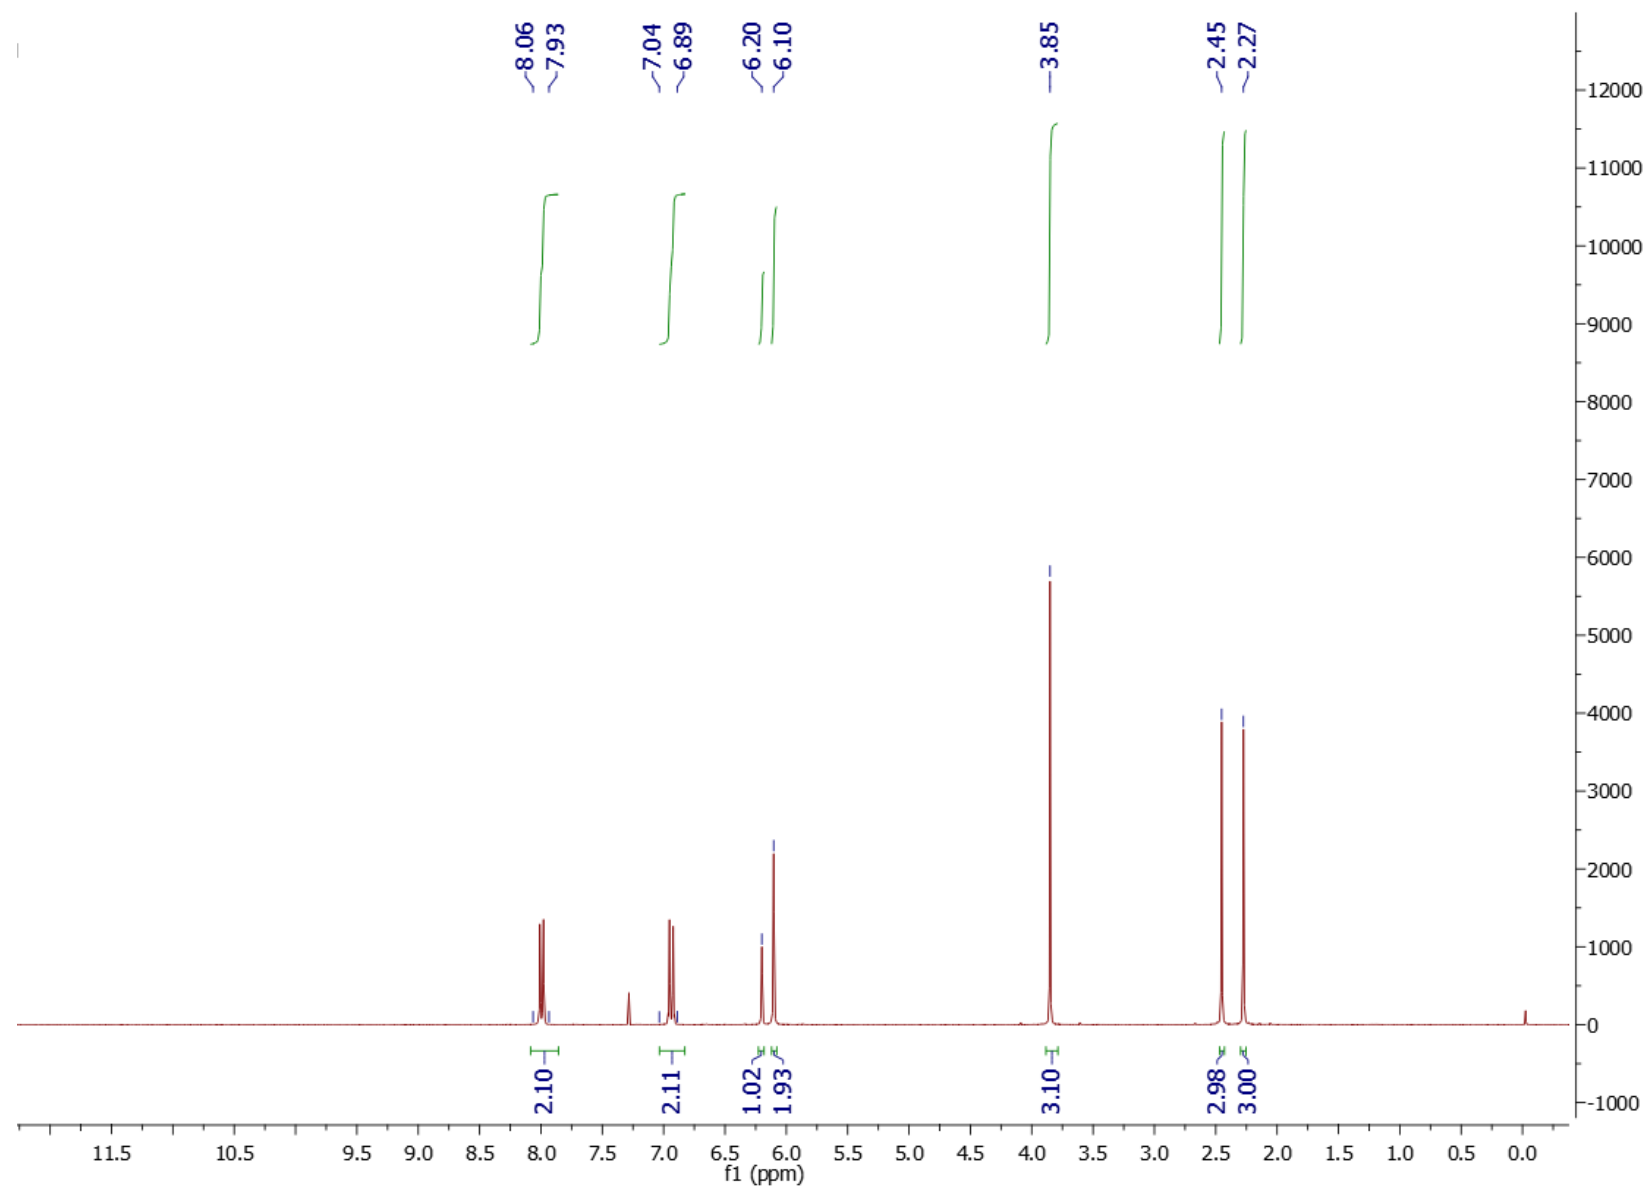

**Data 17.**  $^{13}\text{C}$ -NMR spectrum of compound **2f**

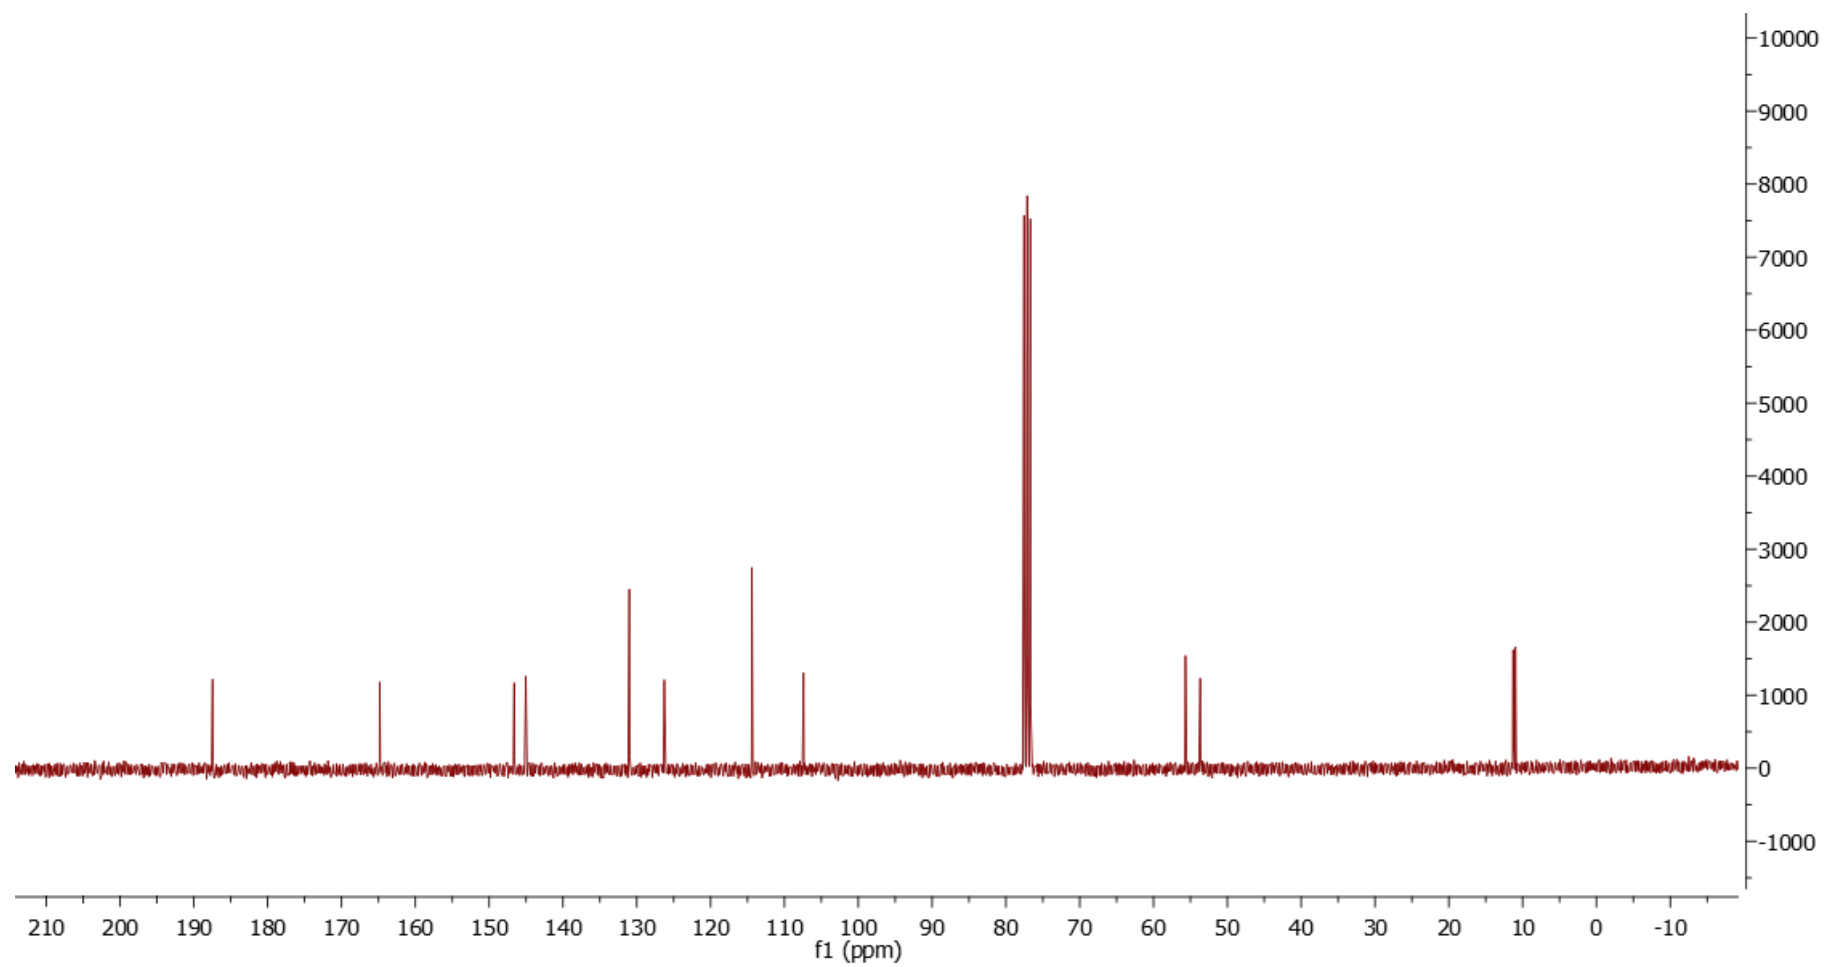

**Data 18. Mass spectrum of compound 2f**

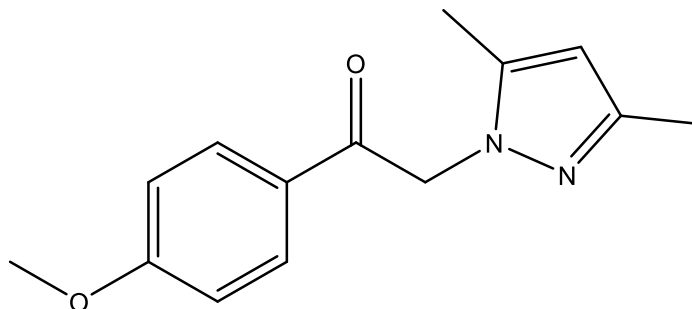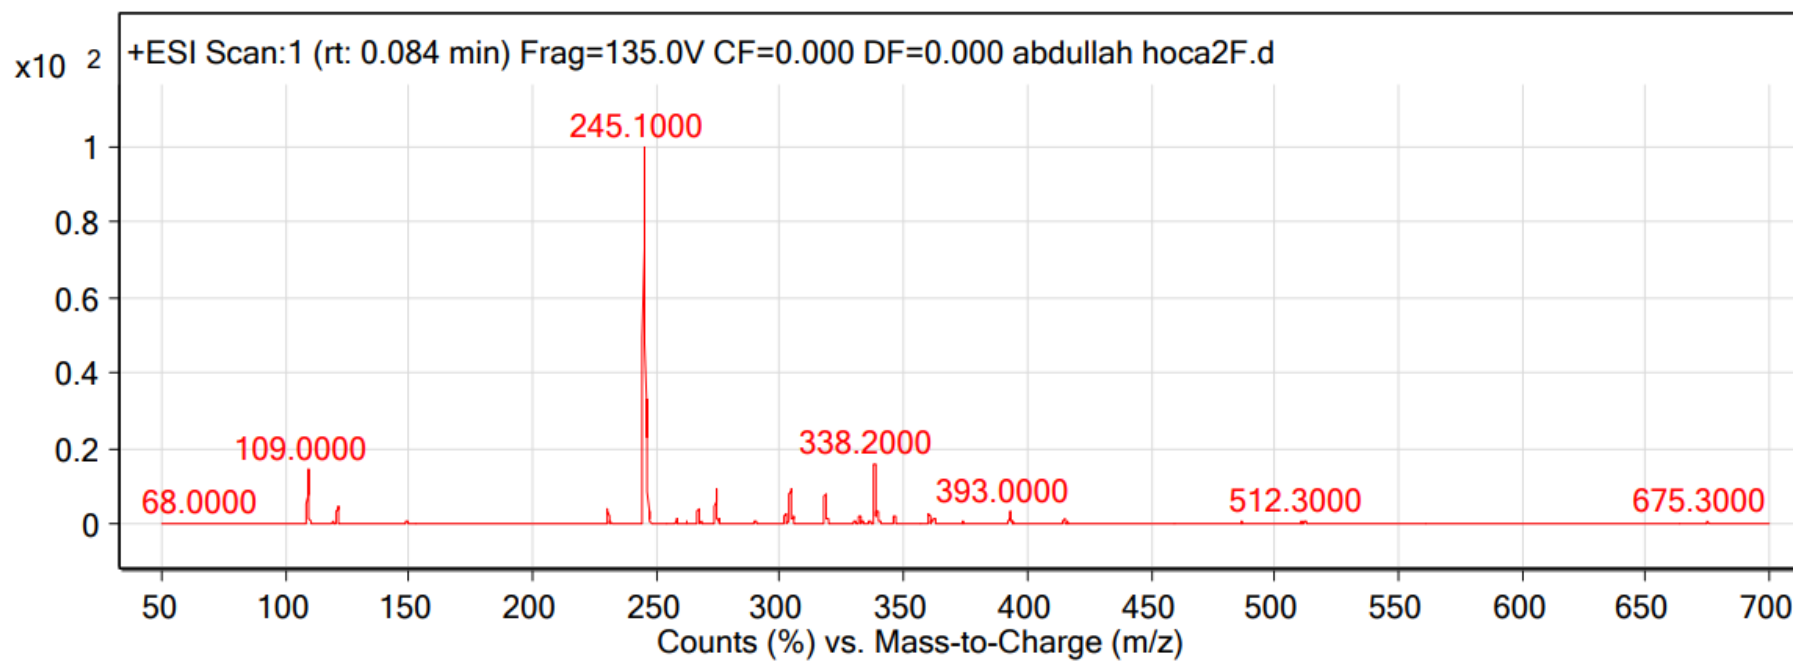

**Data 19.**  $^1\text{H}$ -NMR spectrum of compound 3a

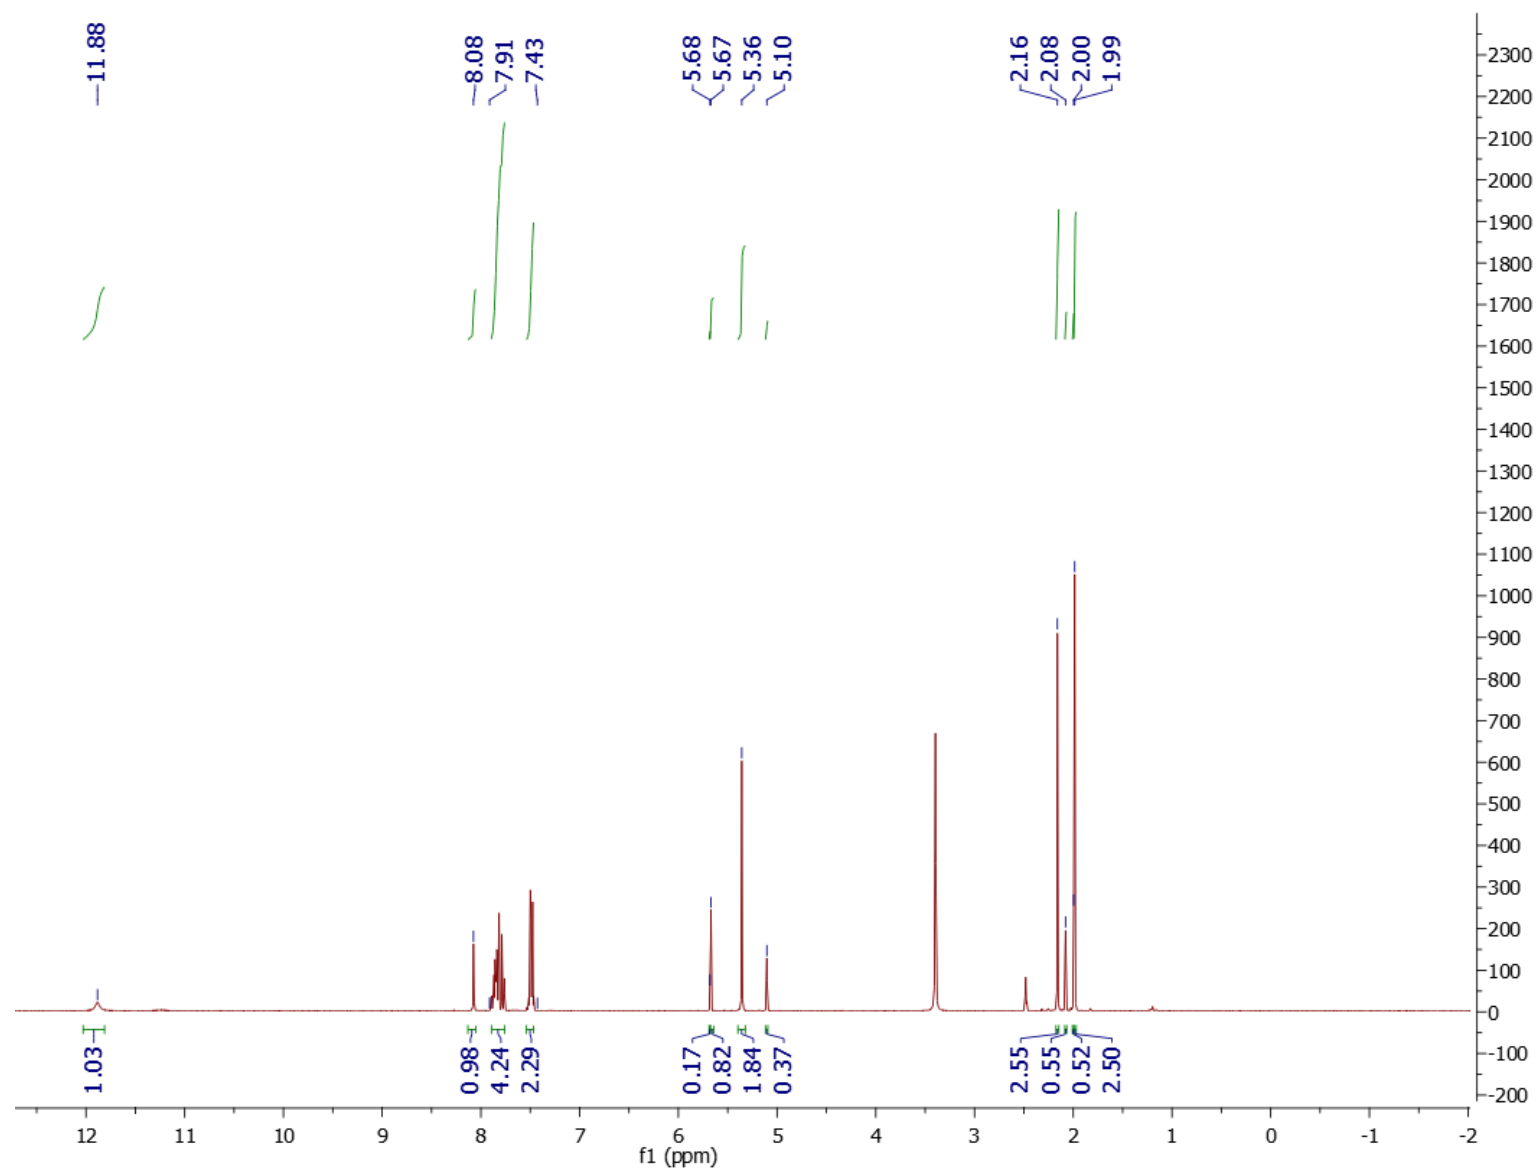

**Data 20.**  $^{13}\text{C}$ -NMR spectrum of compound 3a

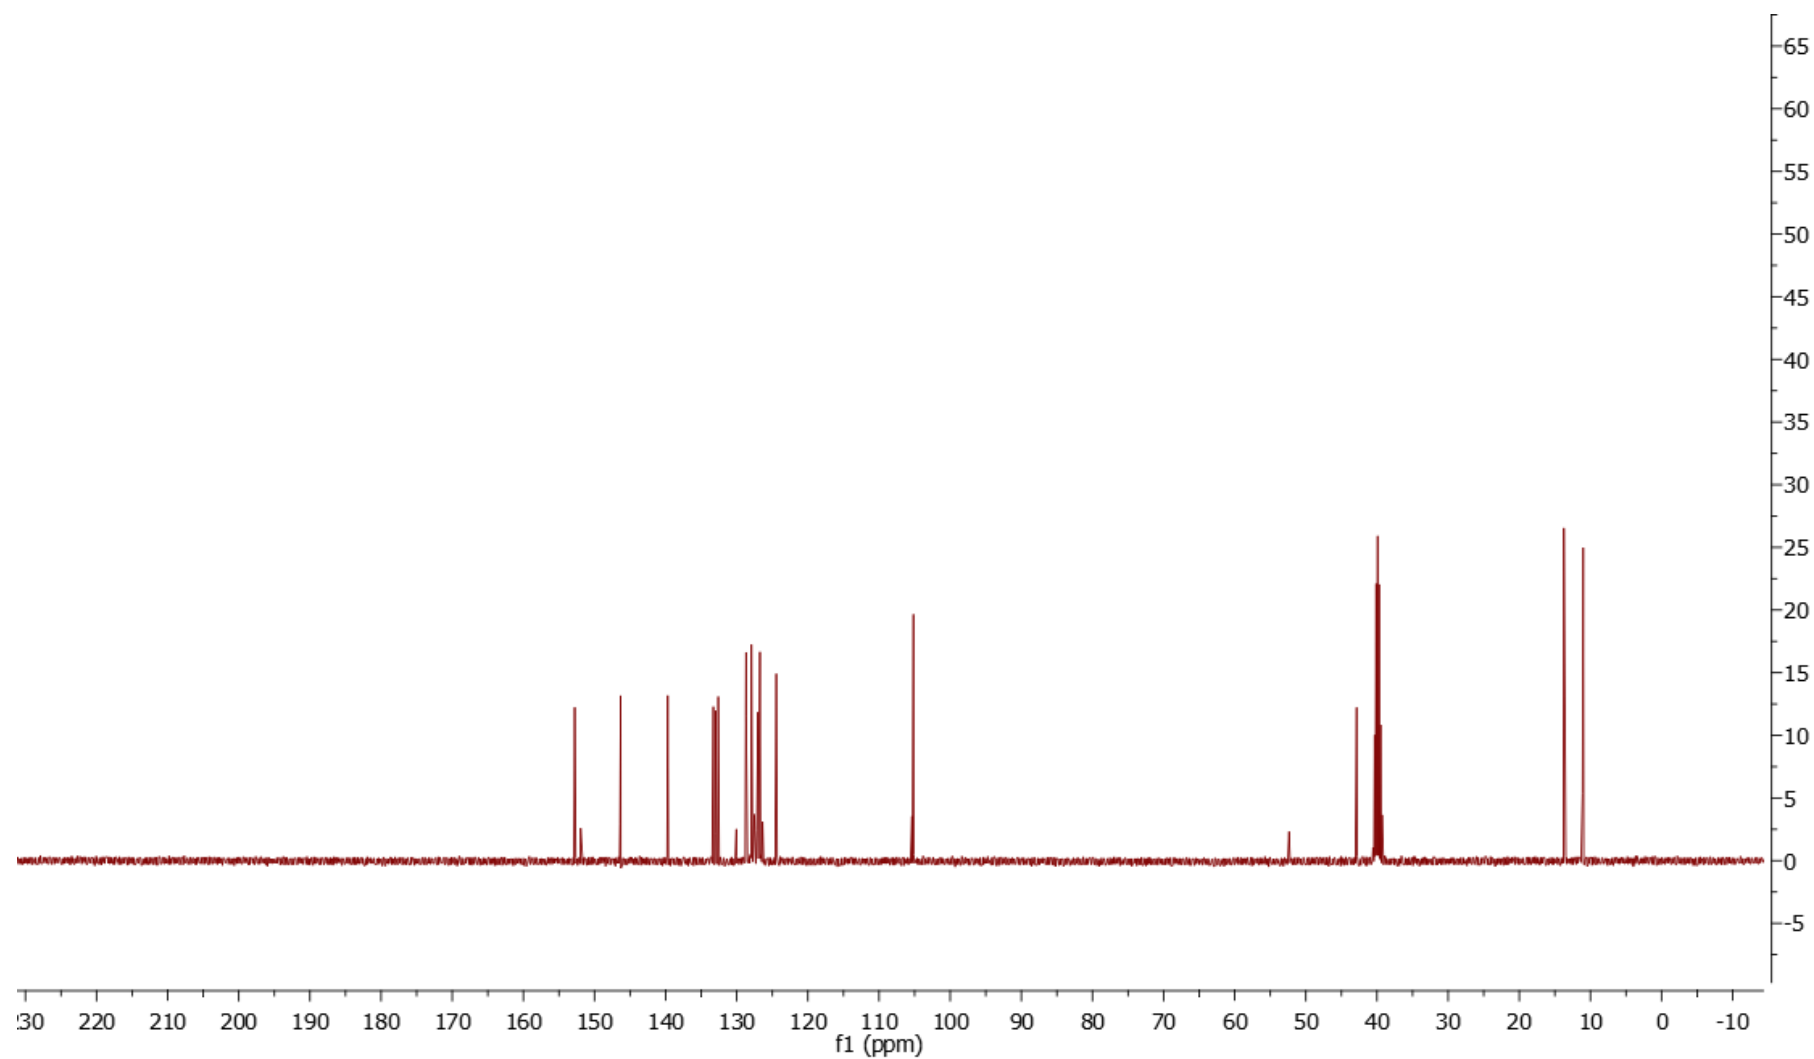

**Data 21. Mass spectrum of compound 3a**

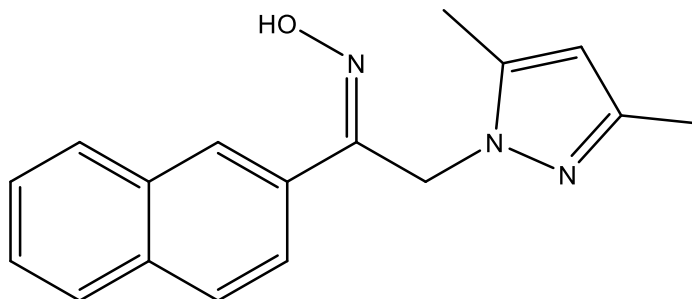

NFOK\_01 128 (4.456) Cm (128-(31:40+185:192))

1: TOF MS ES+  
1.23e5

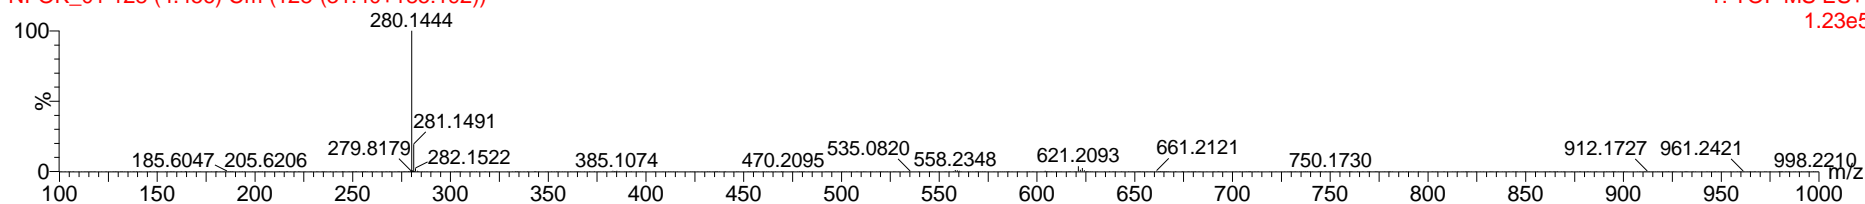

**Data 22.**  $^1\text{H}$ -NMR spectrum of compound **3b**

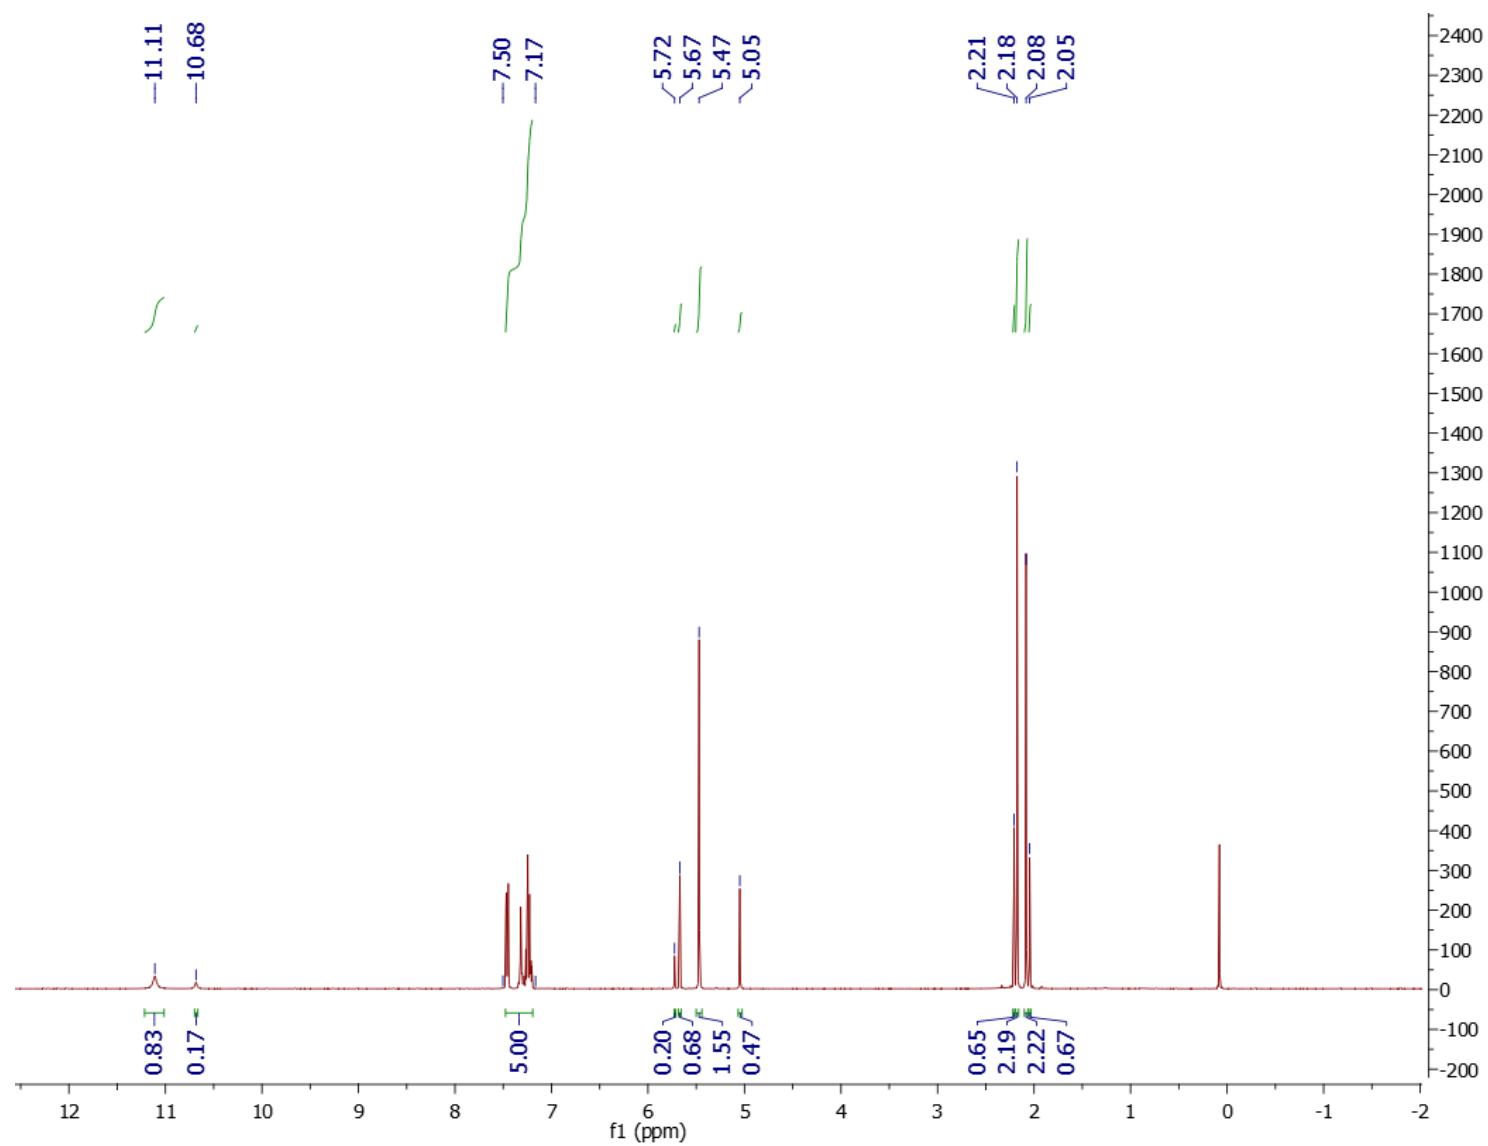



**Data 23.**  $^{13}\text{C}$ -NMR spectrum of compound 3b

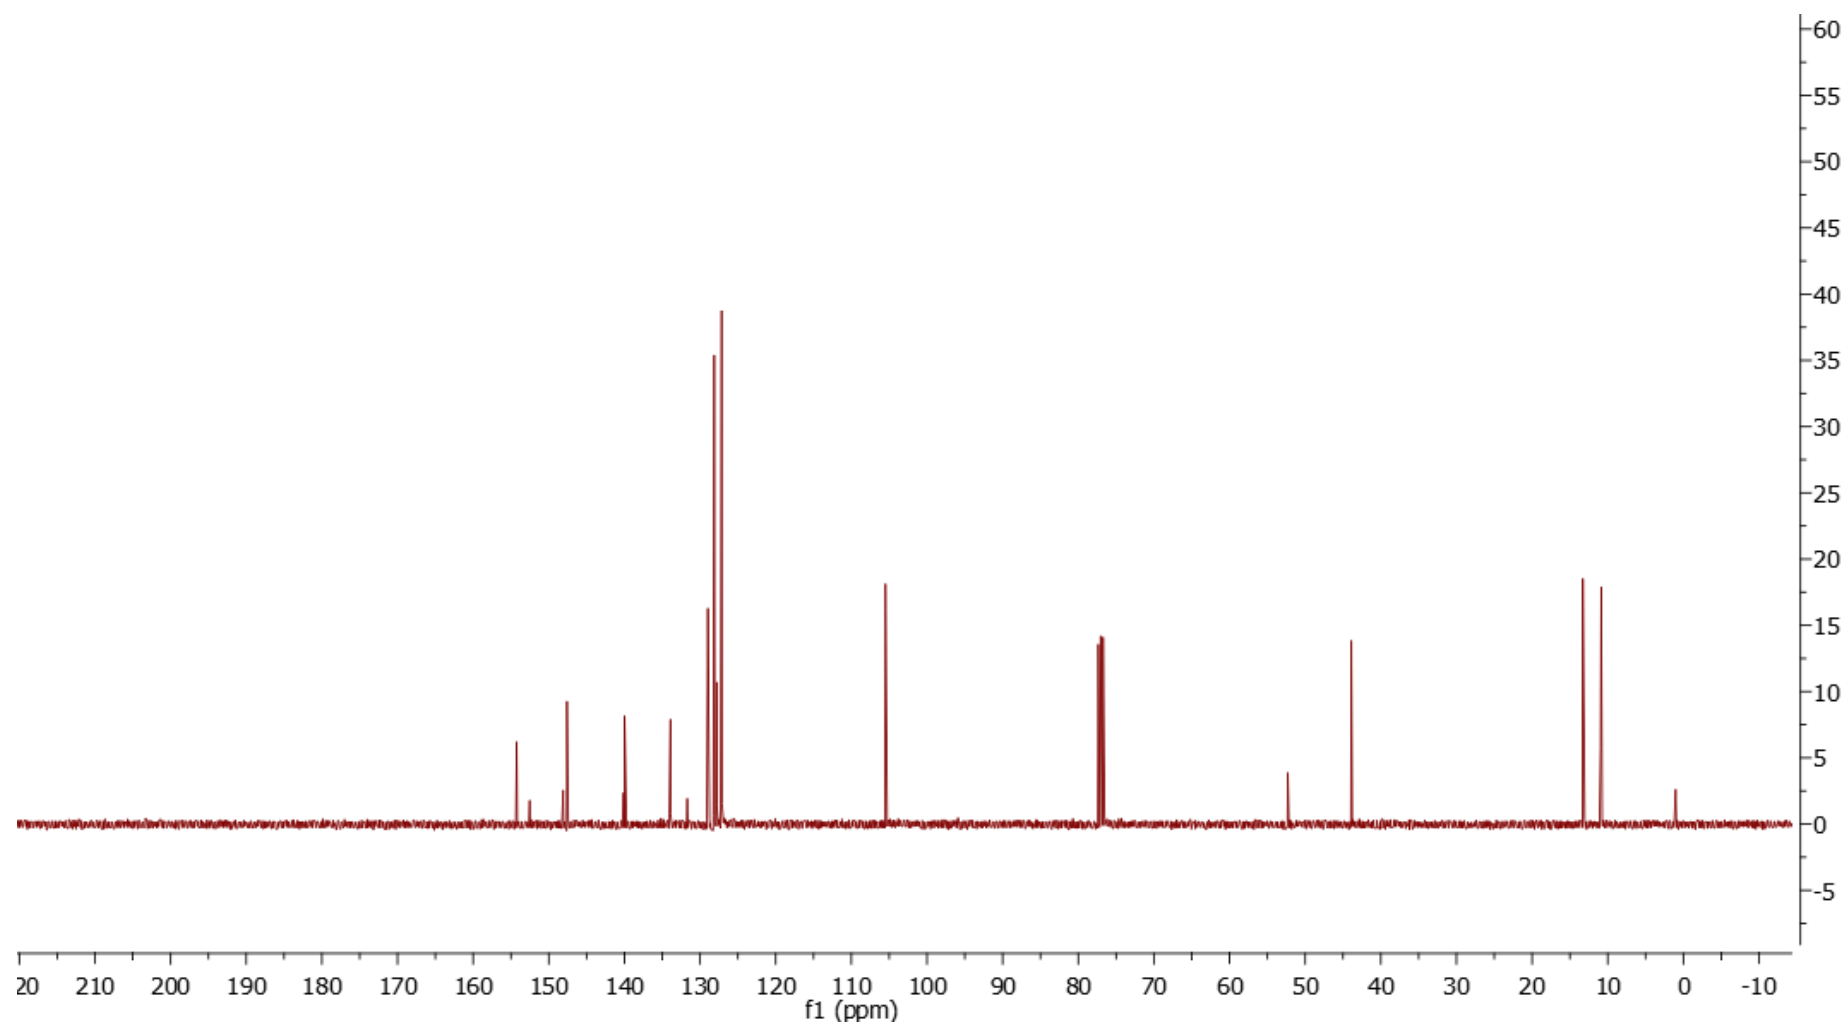

**Data 24. Mass spectrum of compound 3b**

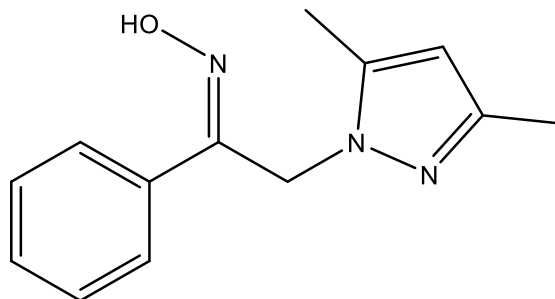

FNOK\_01 108 (3.764) Cm (108-(31:41+149:166))

1: TOF MS ES+  
6.01e4

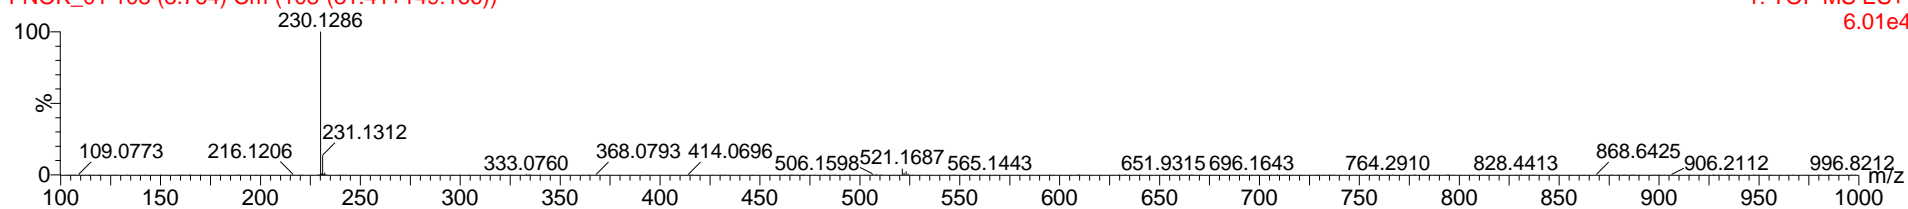

**Data 25.**  $^1\text{H}$ -NMR spectrum of compound **3c**

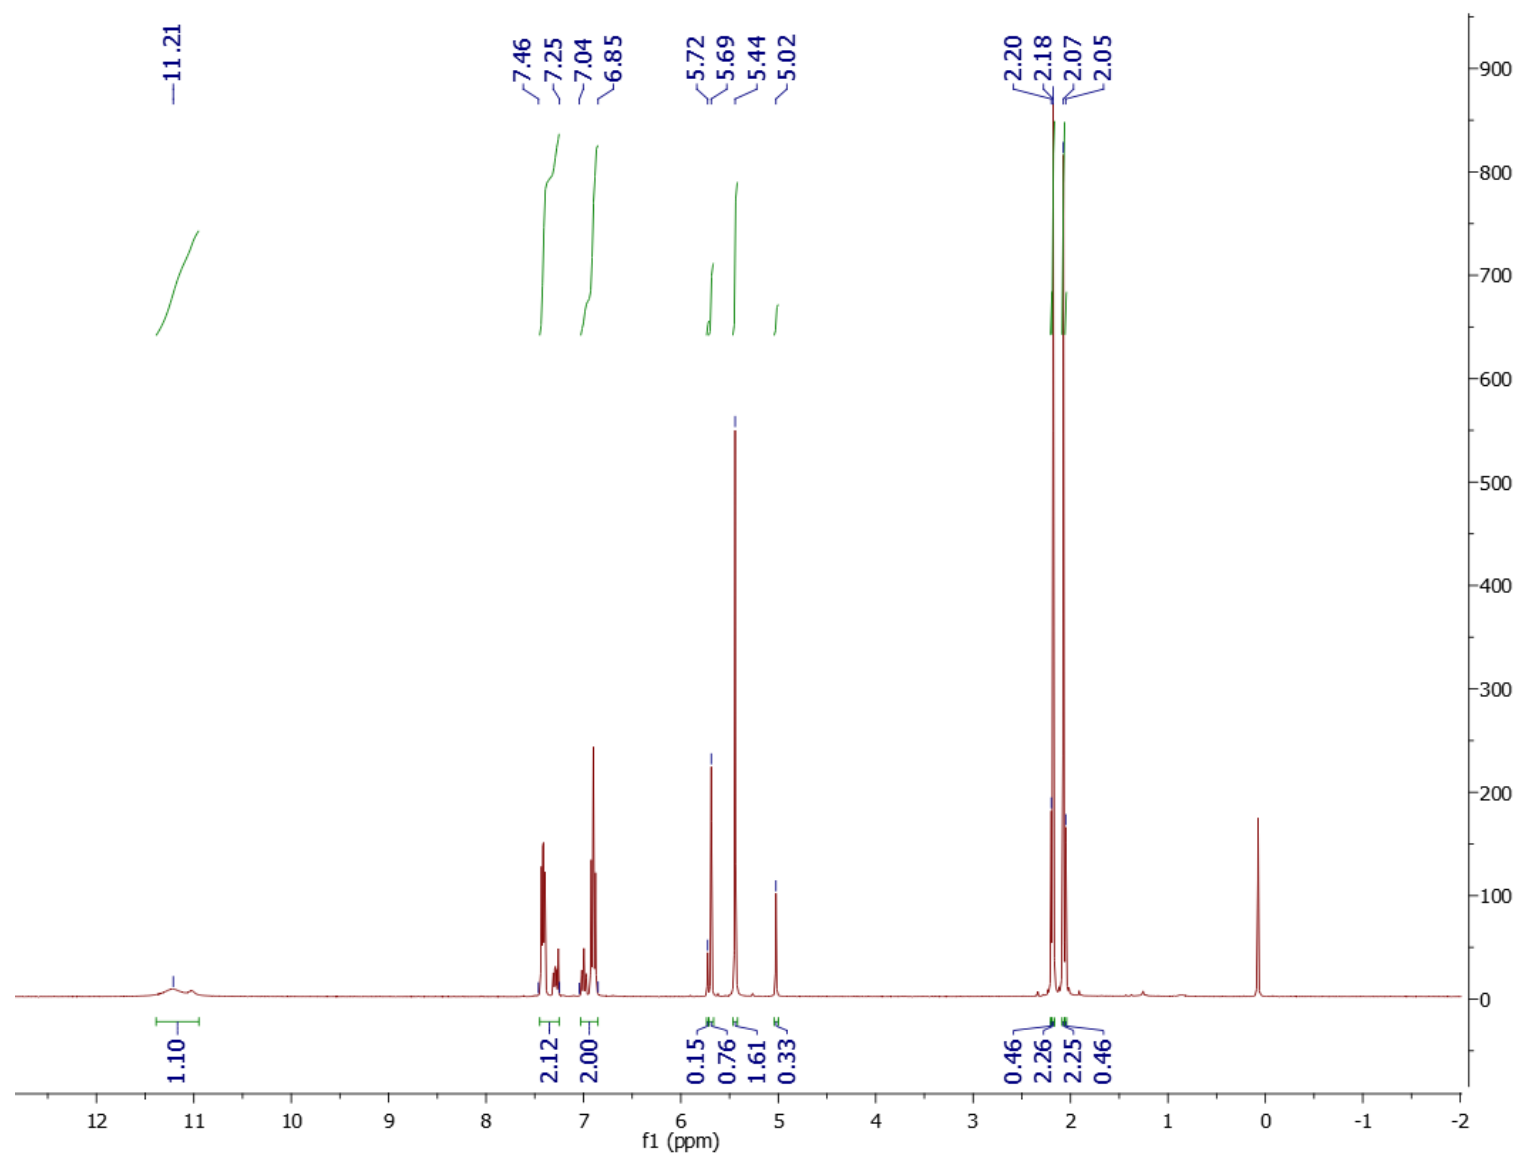

**Data 26.**  $^{13}\text{C}$ -NMR spectrum of compound **3c**

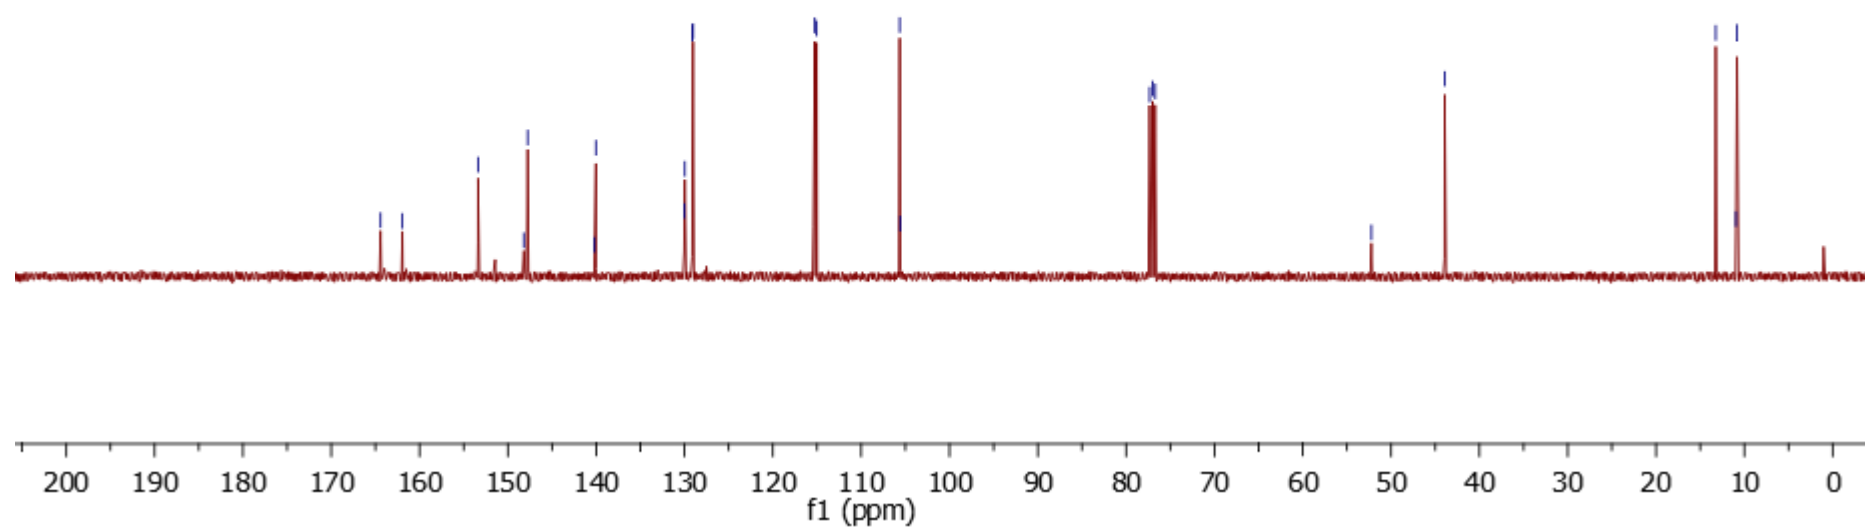

**Data 27. Mass spectrum of compound 3c**

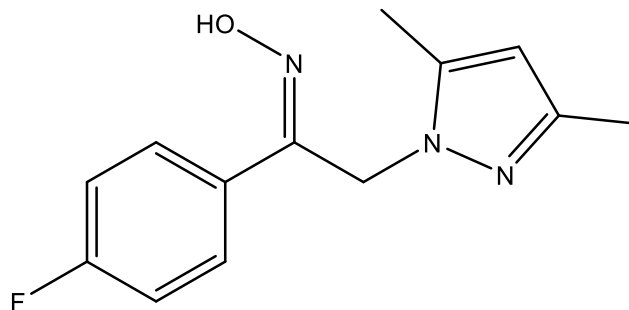

FLOK 109 (3.812)

1: TOF MS ES+  
3.00e4

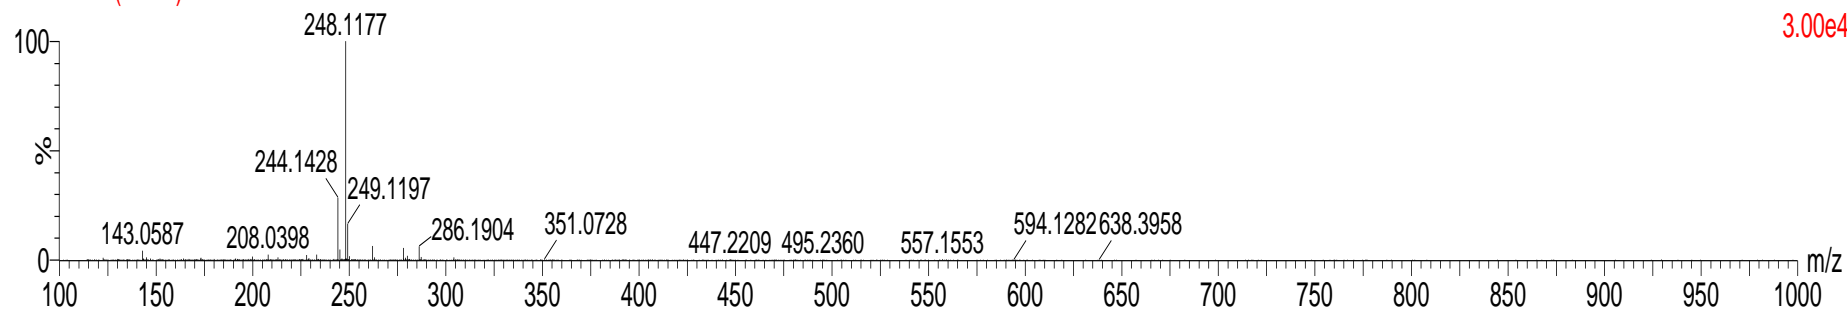

**Data 28.**  $^1\text{H}$ -NMR spectrum of compound 3d

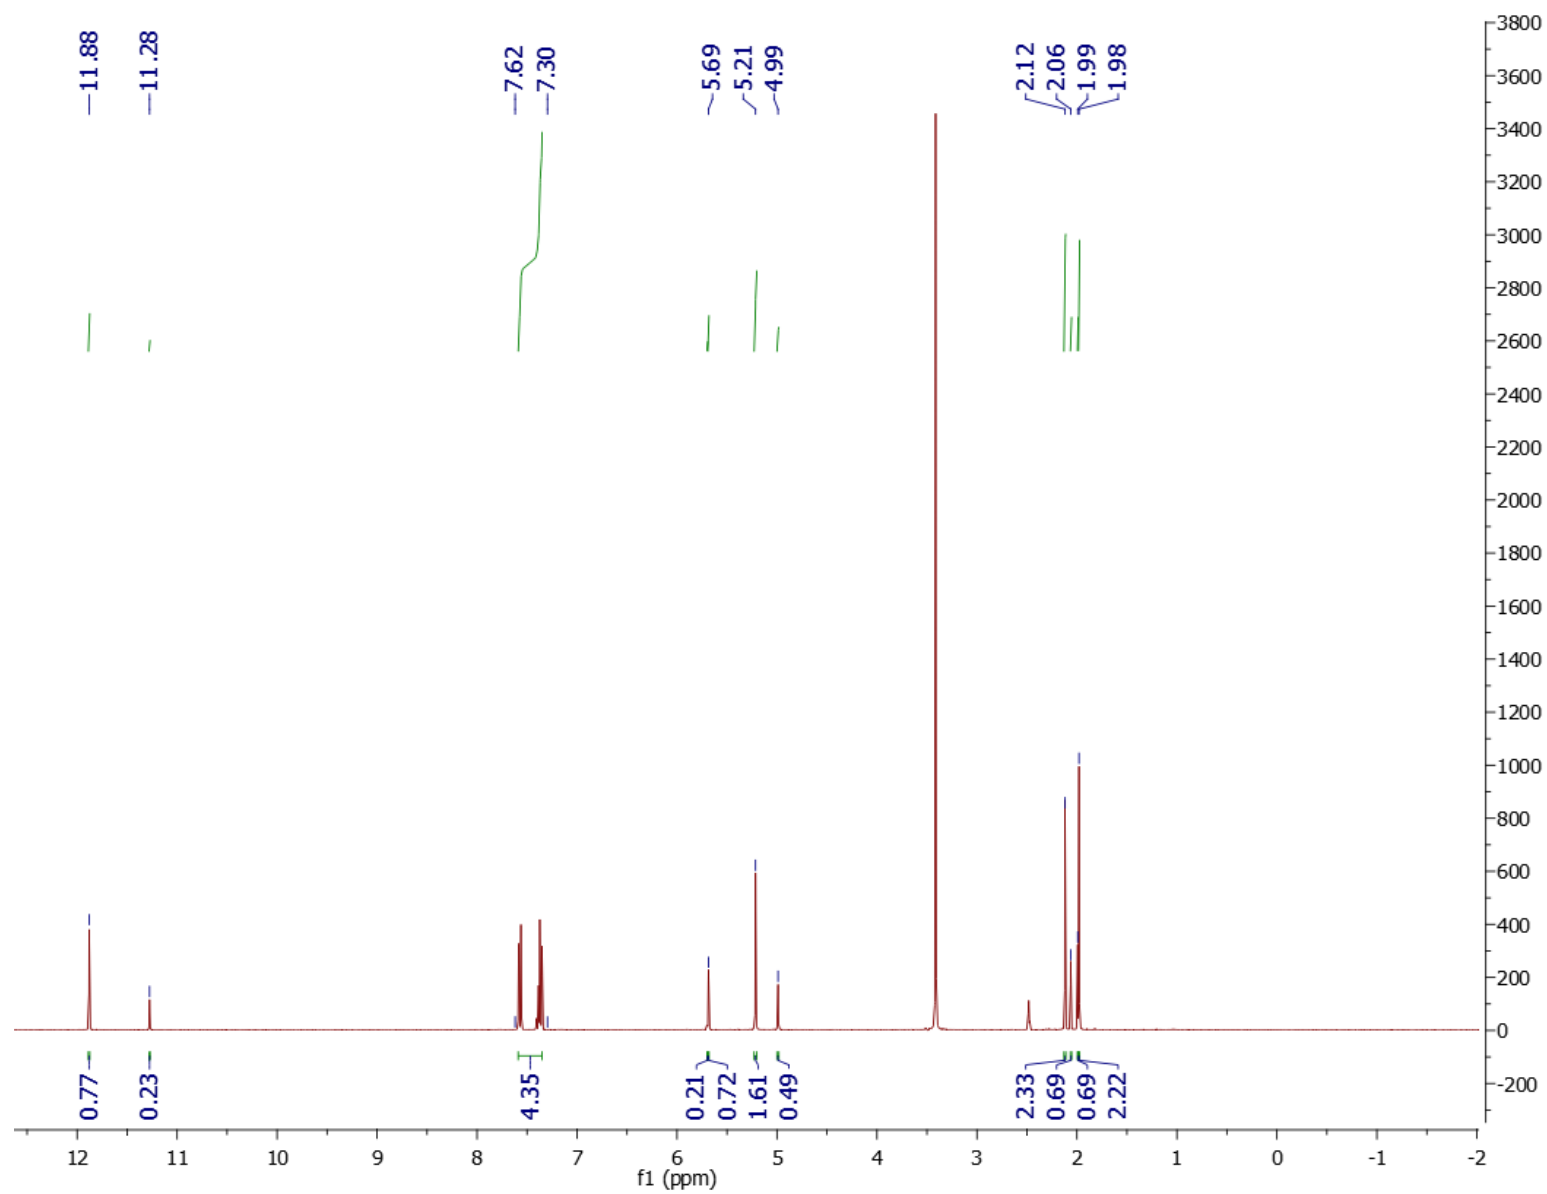

**Data 29.**  $^{13}\text{C}$ -NMR spectrum of compound 3d

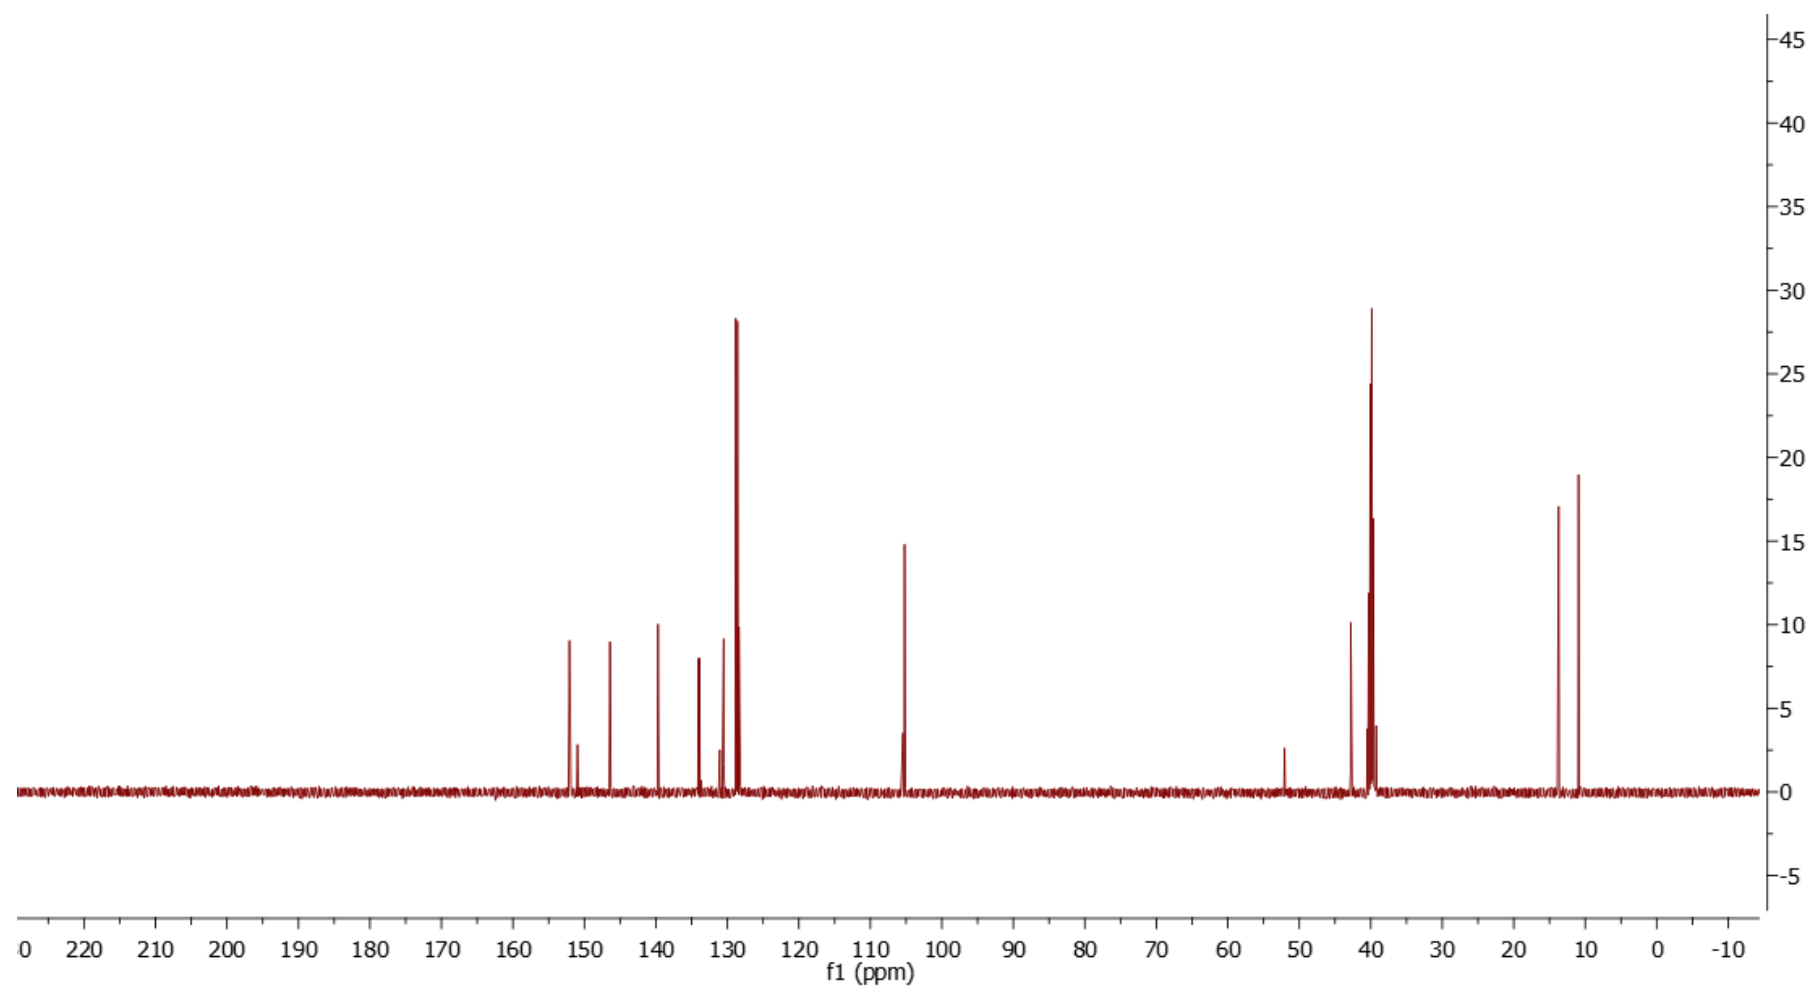

**Data 30. Mass spectrum of compound 3d**

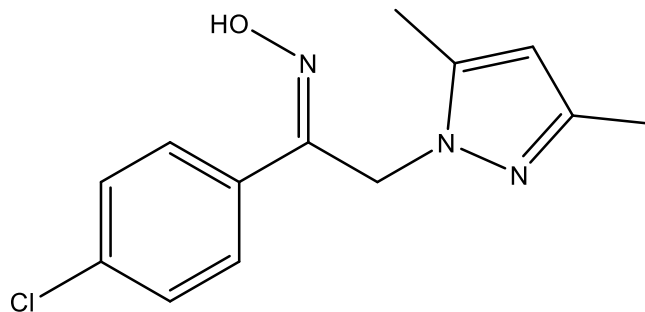

CLOK 118 (4.119)

1: TOF MS ES+  
2.45e5

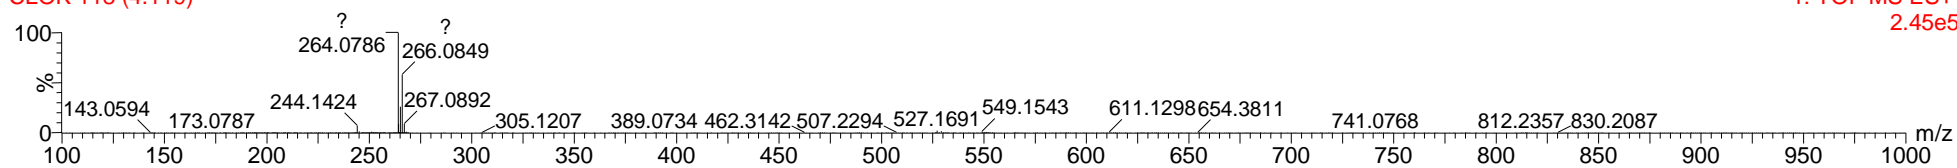



Data 31.  $^1\text{H}$ -NMR spectrum of compound 3e

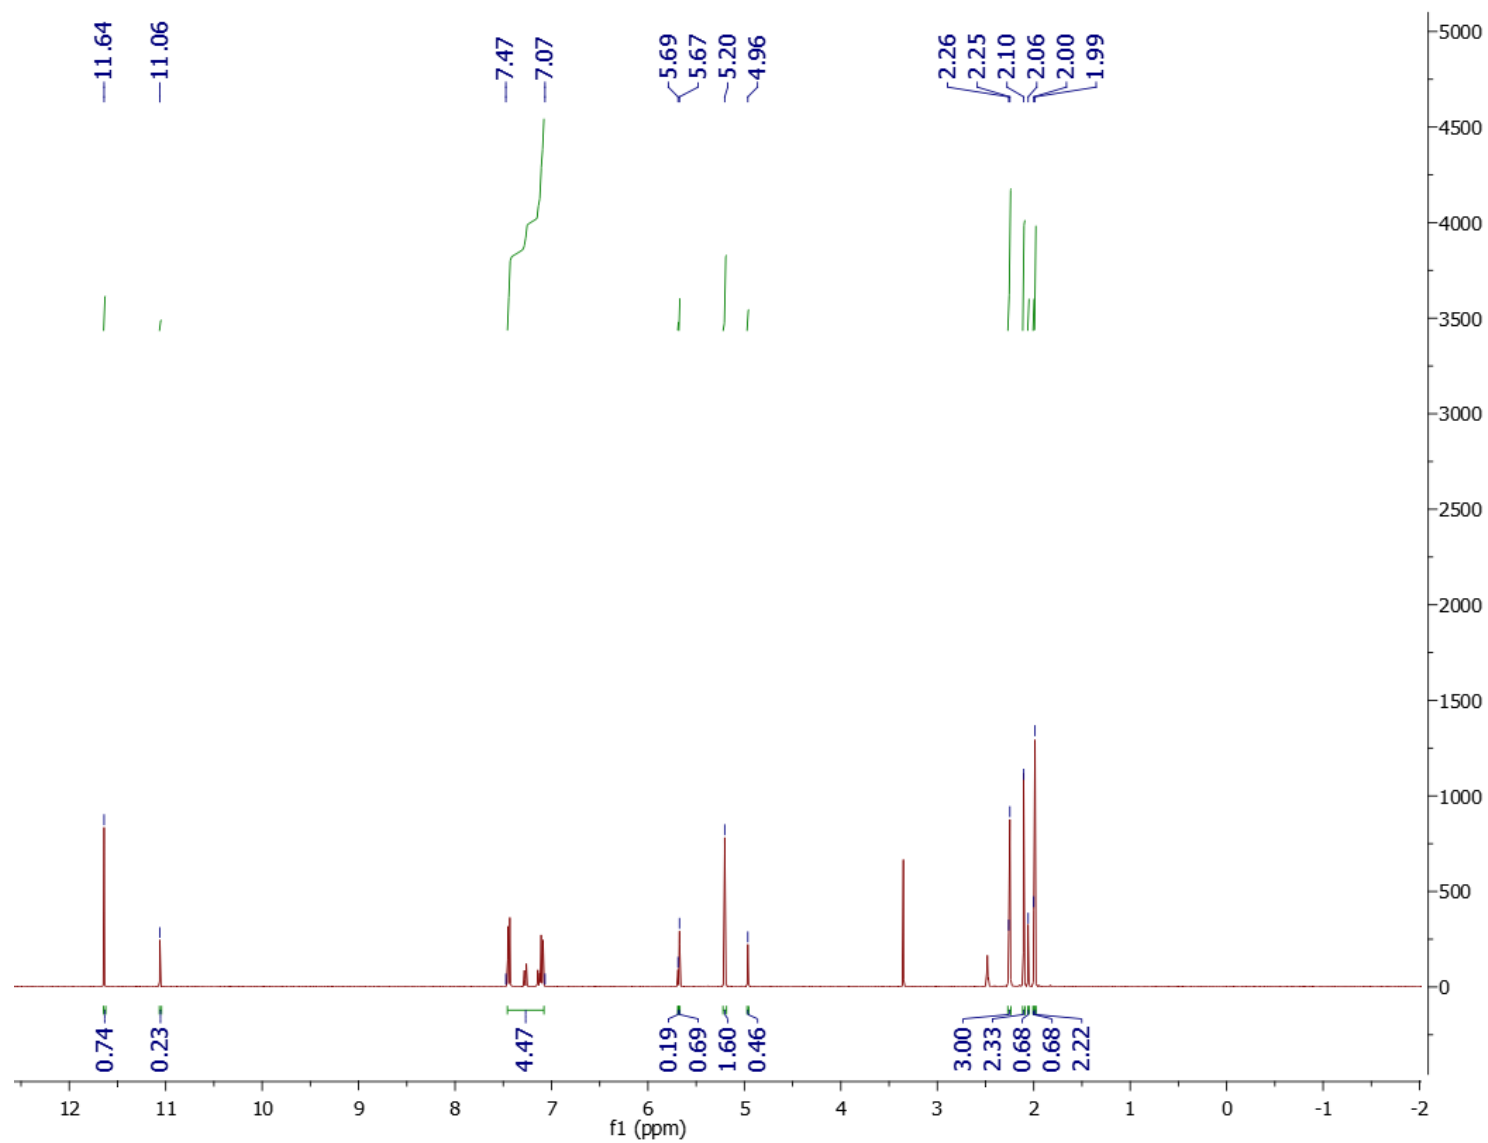

**Data 32.**  $^{13}\text{C}$ -NMR spectrum of compound 3e

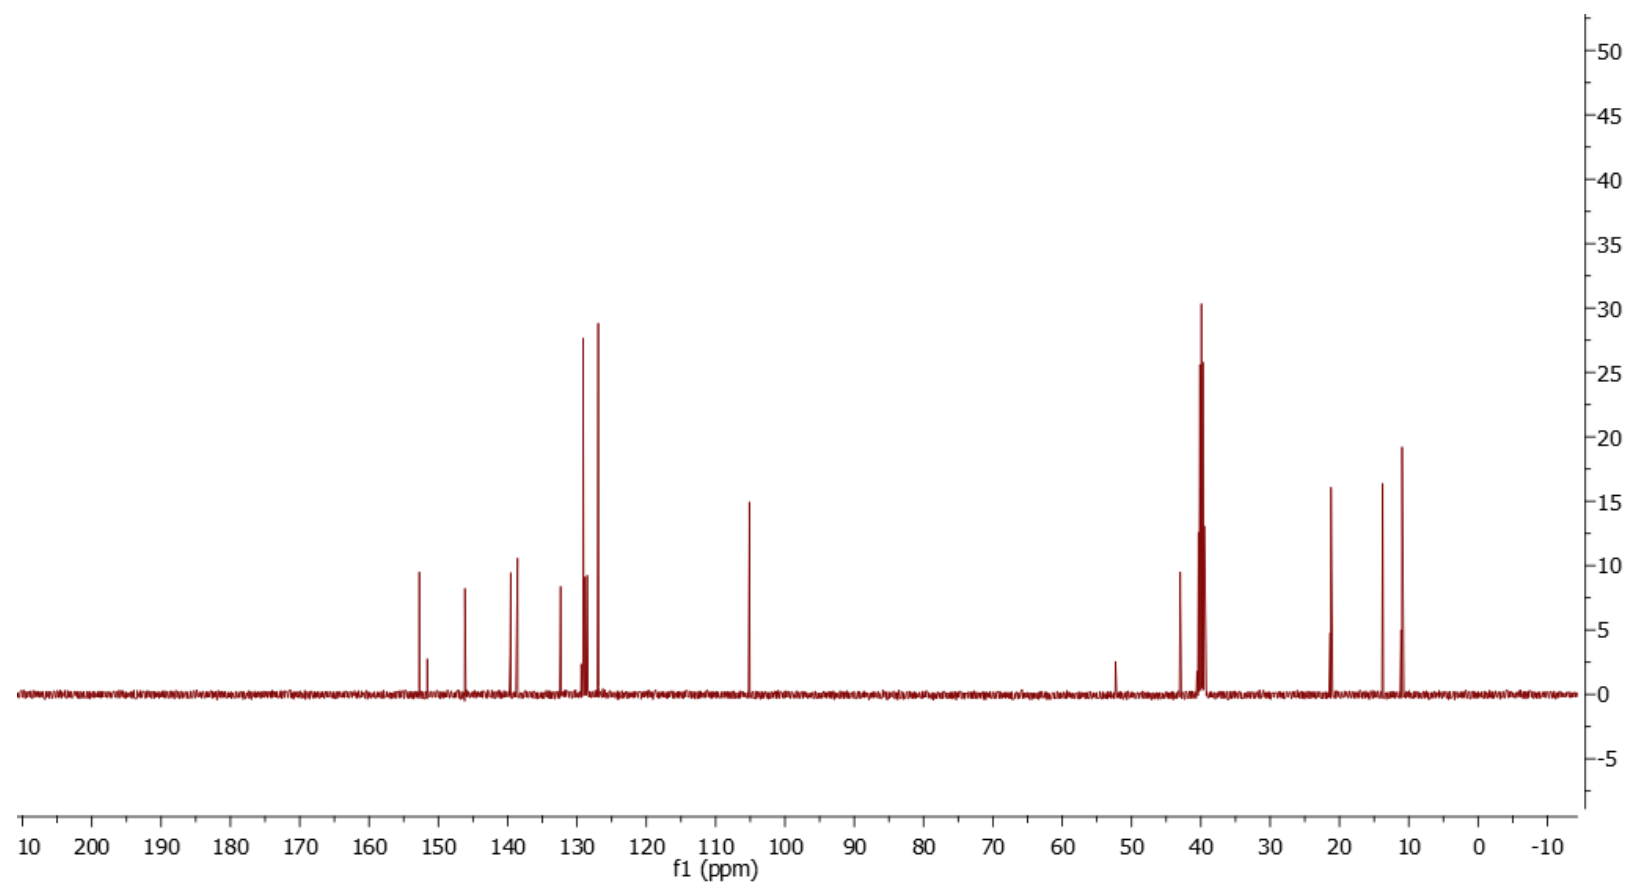

**Data 33. Mass spectrum of compound 3e**

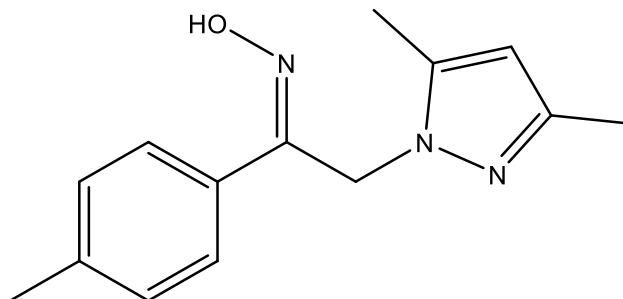

MEOK 125 (4.371)

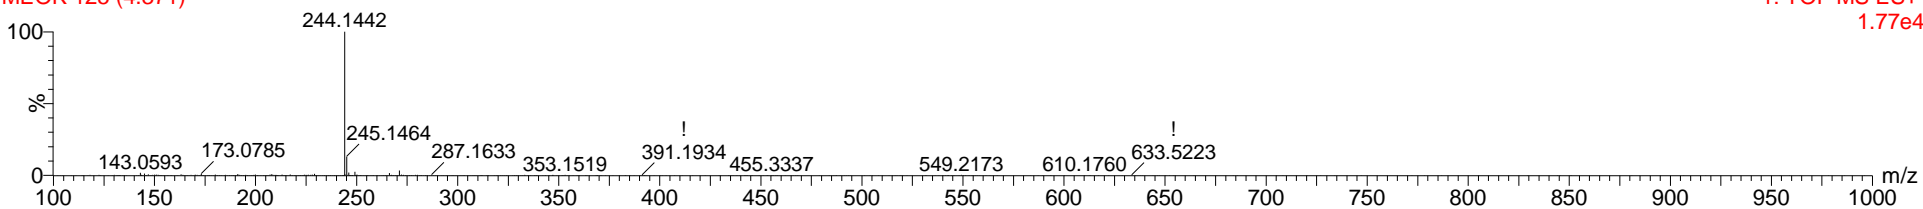

1: TOF MS ES+  
1.77e4

Data 34.  $^1\text{H}$ -NMR spectrum of compound 3f

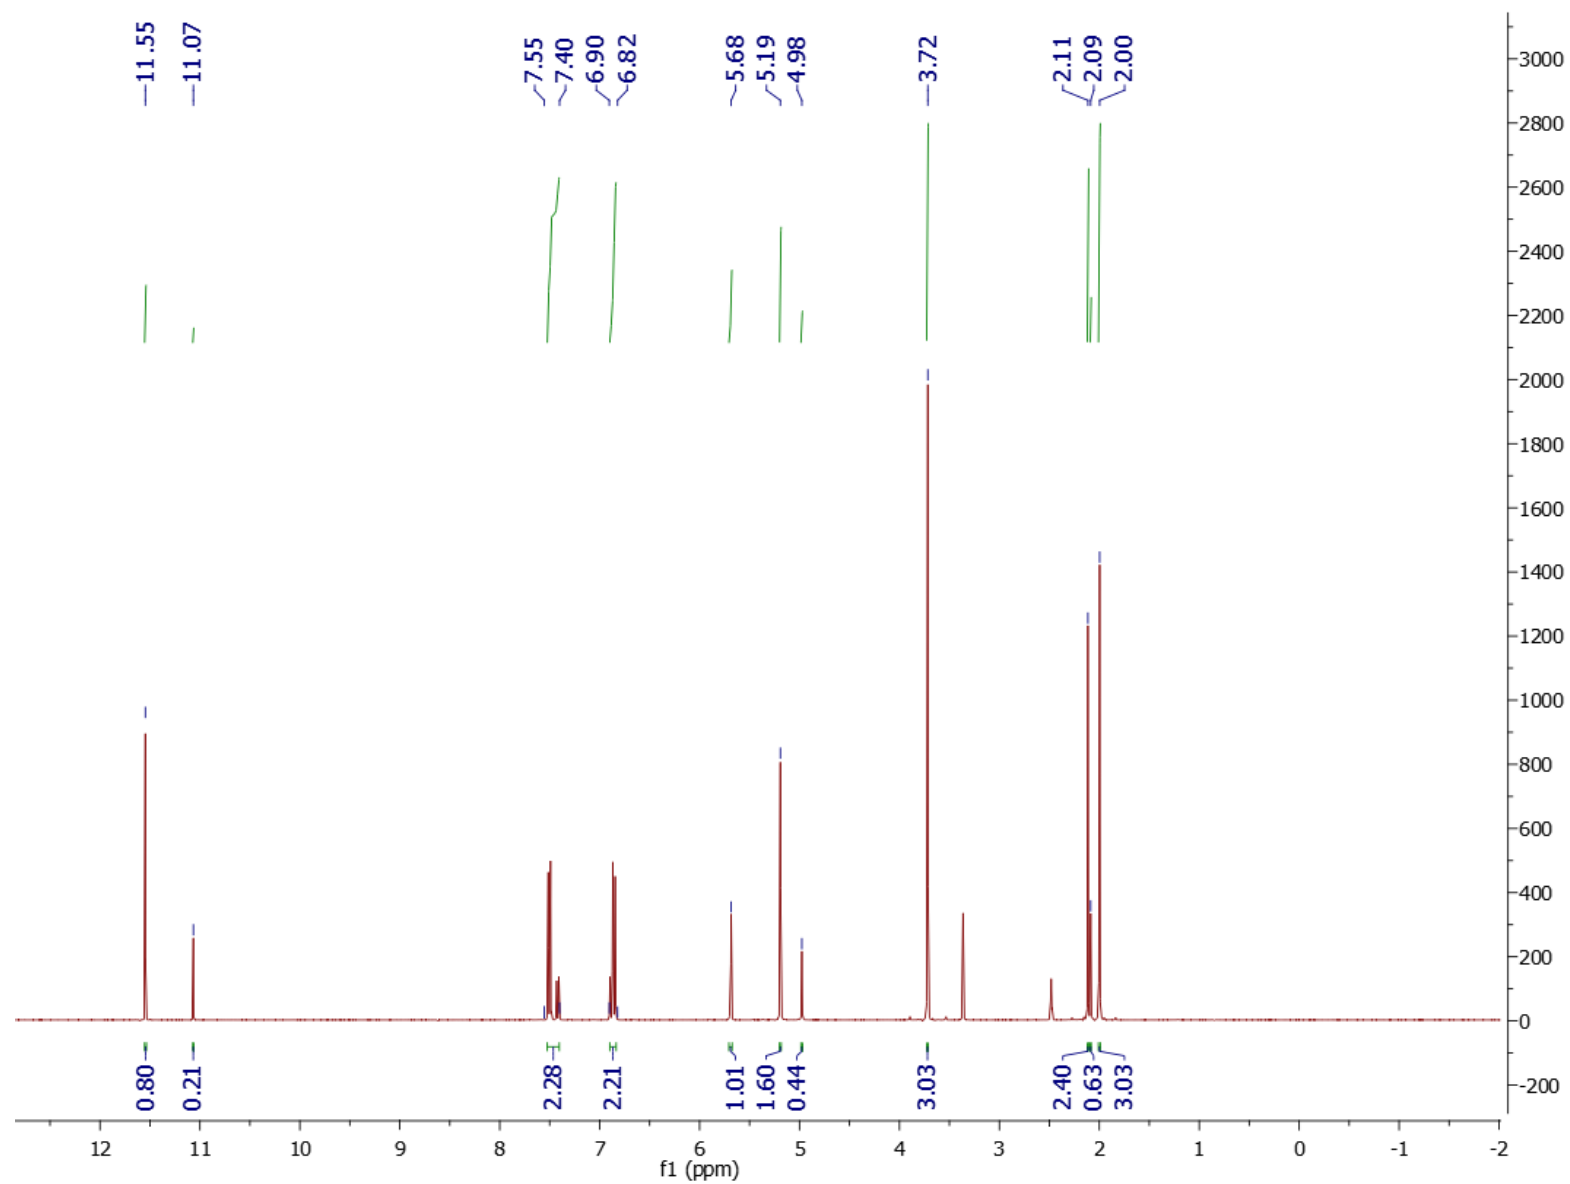

**Data 35.**  $^{13}\text{C}$ -NMR spectrum of compound 3f

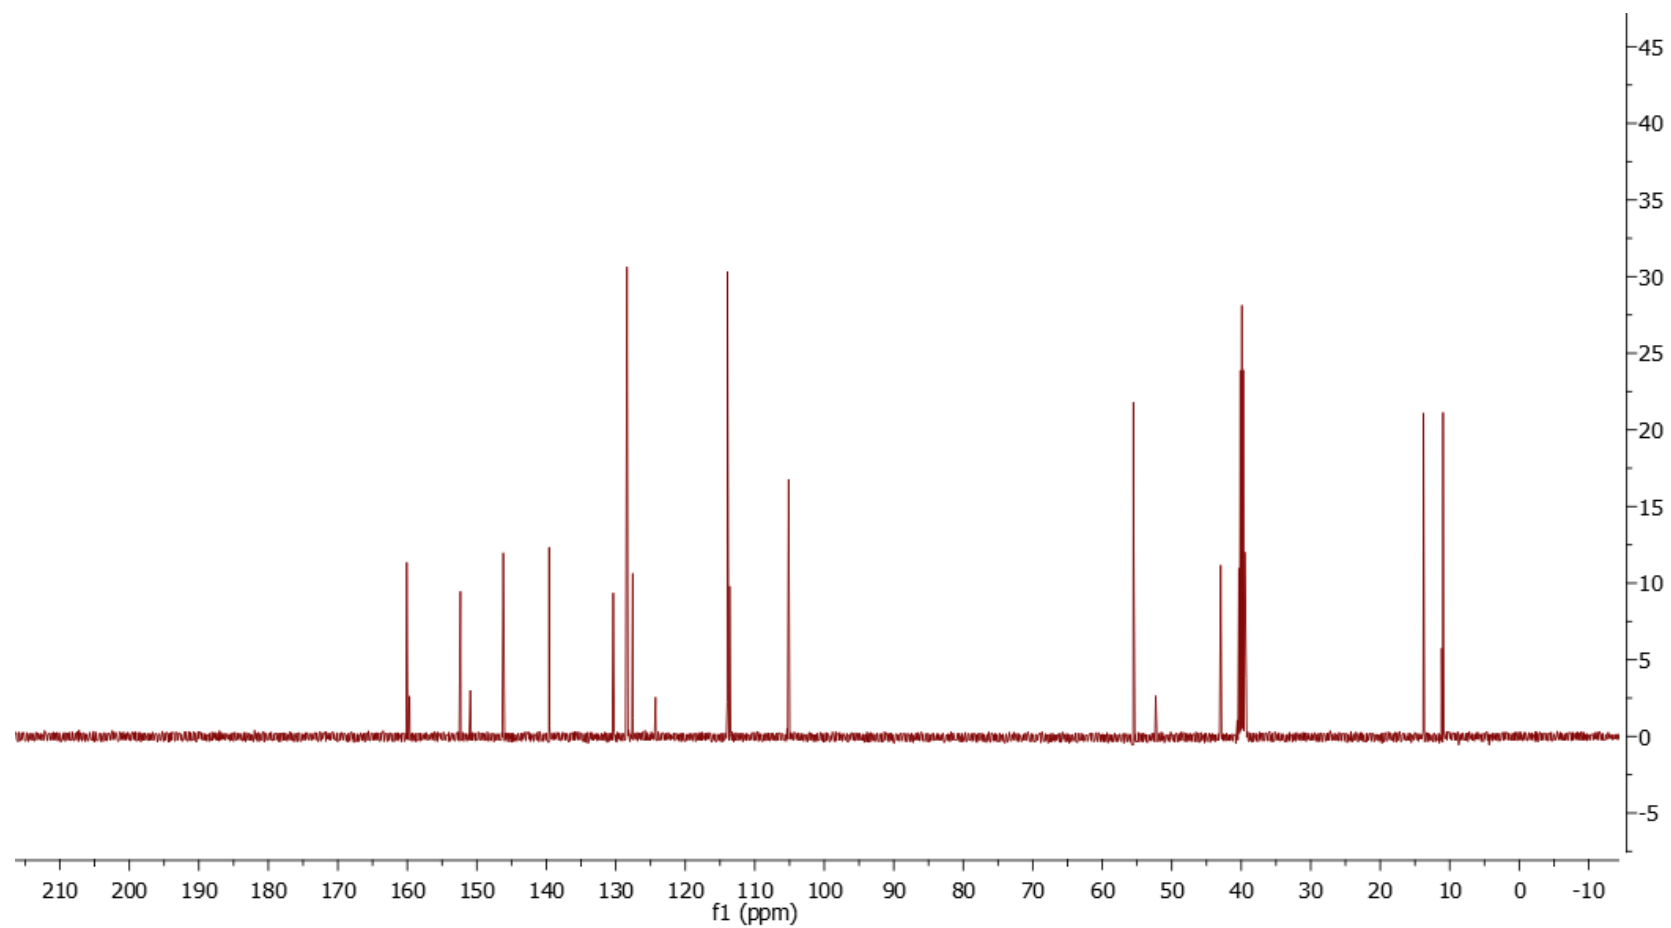

**Data 36. Mass spectrum of compound 3f**

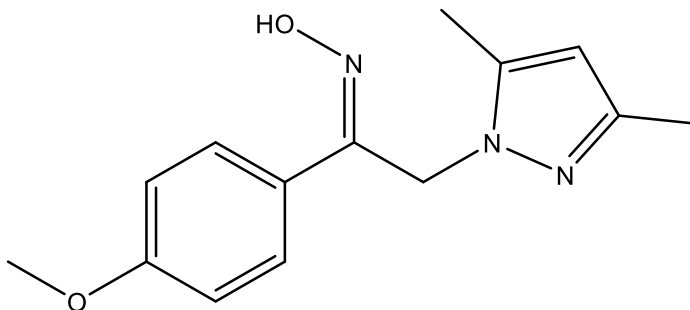

MOOK\_210616 109 (3.822) Cm (109-(16:23+181:190))

1: TOF MS ES+  
2.65e4

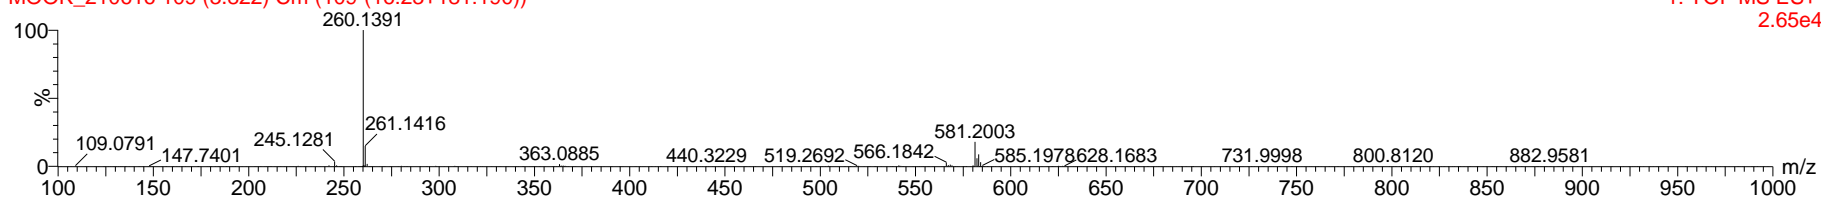

Data 37.  $^1\text{H}$ -NMR spectrum of compound 4a

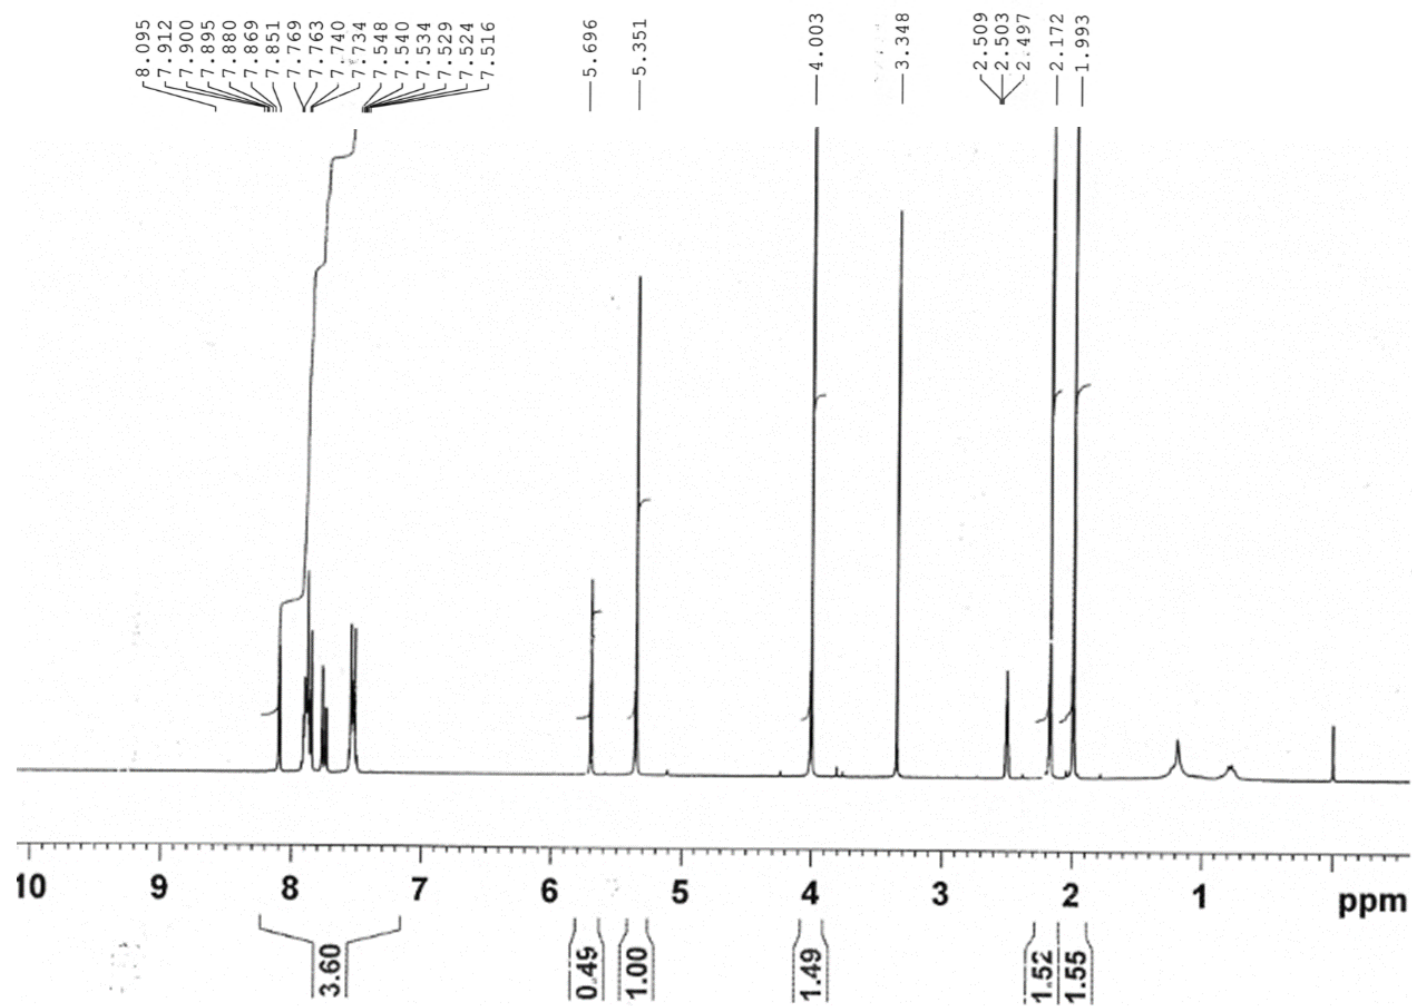

**Data 38.**  $^{13}\text{C}$ -NMR spectrum of compound 4a

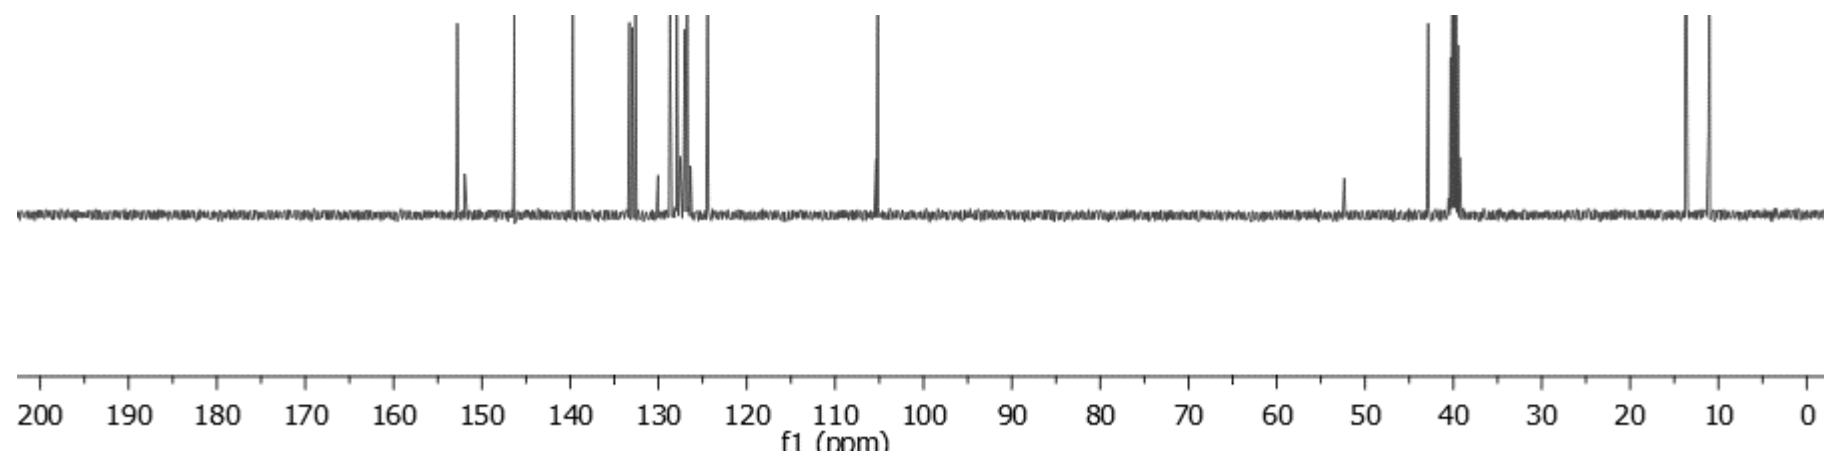



**Data 39. Mass spectrum of compound 4a**

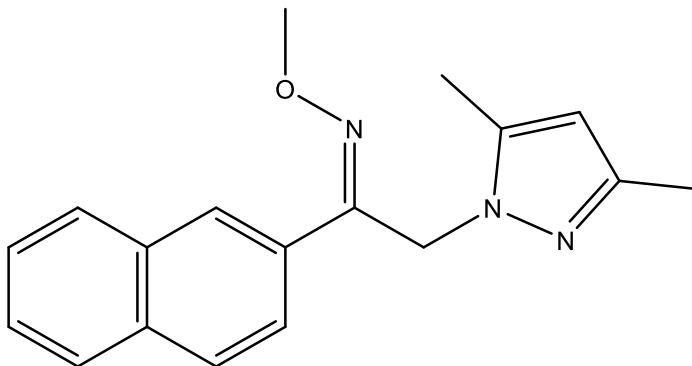

NFMT\_01 182 (6.367) Cm (182-(41:59+202:208))

1: TOF MS ES+  
1.58e4

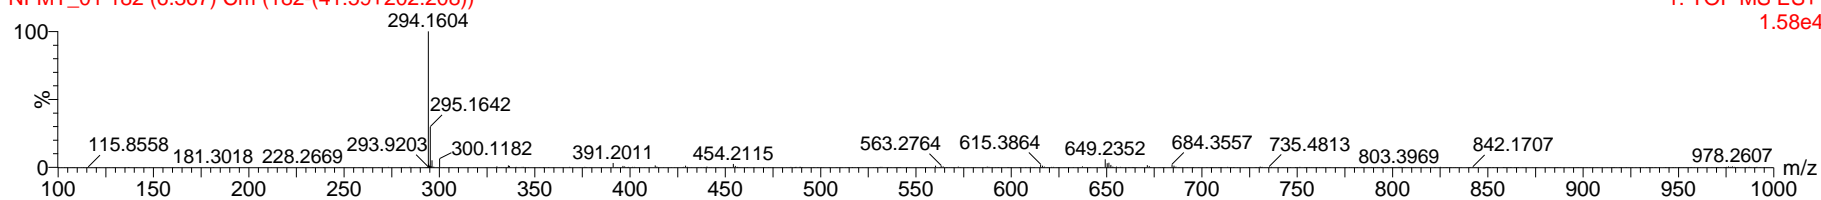

**Data 40.**  $^1\text{H}$ -NMR spectrum of compound 4b

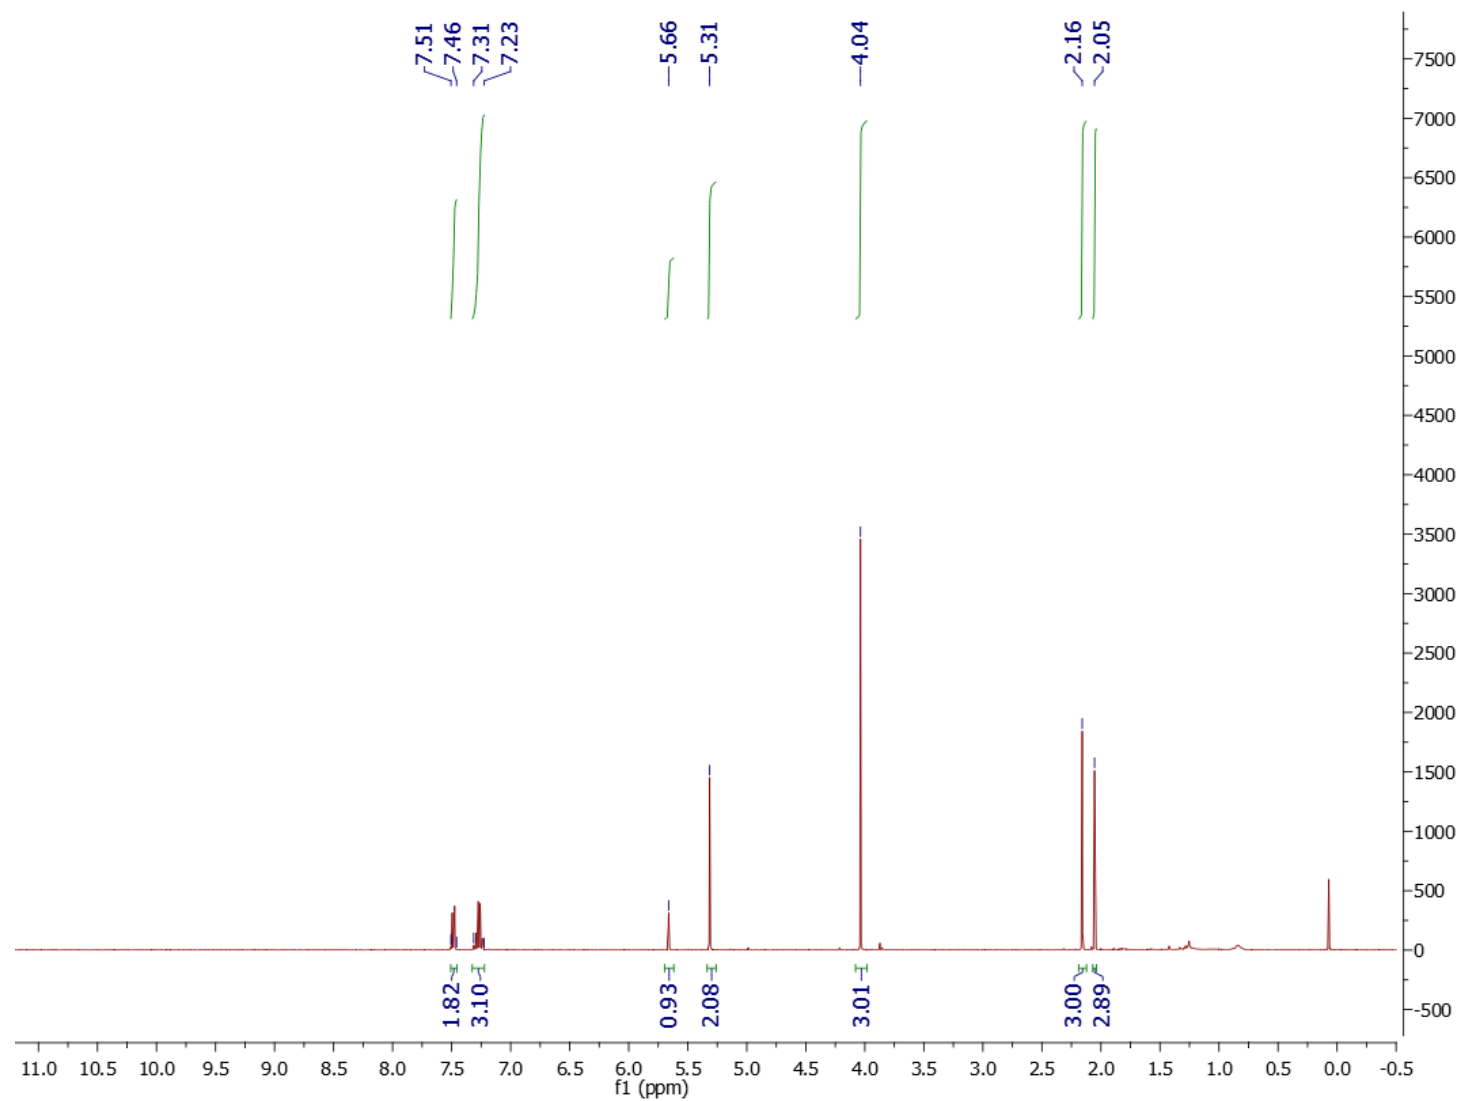

**Data 41.**  $^{13}\text{C}$ -NMR spectrum of compound 4b

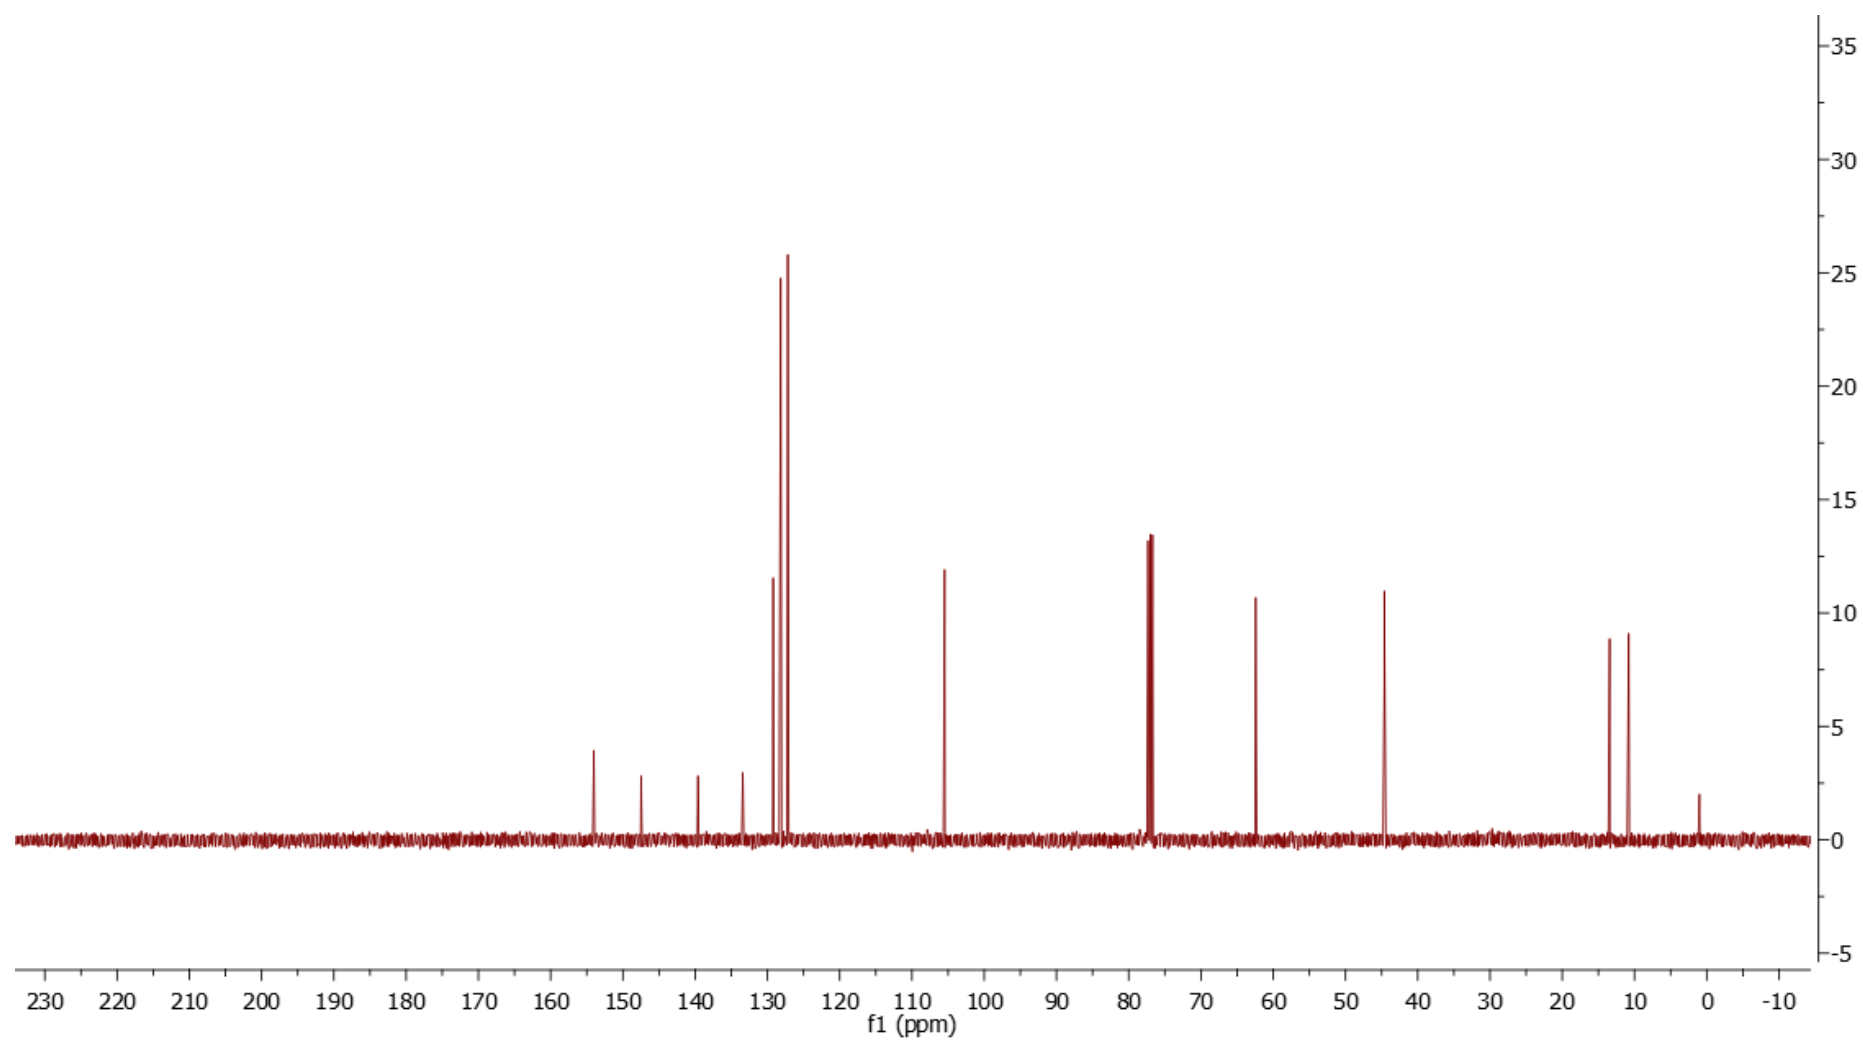

**Data 42. Mass spectrum of compound 4b**

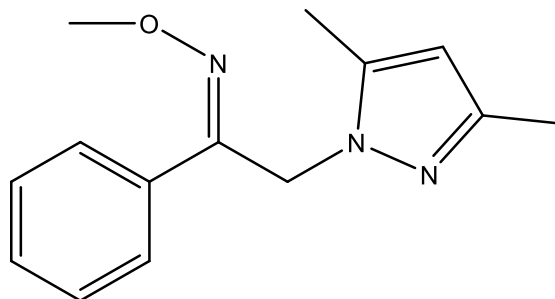

FNMT\_02 138 (4.819)

1: TOF MS ES+  
9.36e3

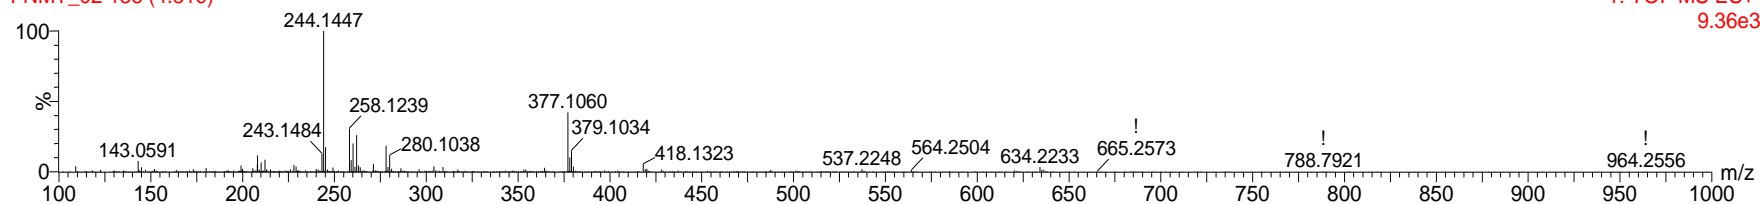

**Data 43.**  $^1\text{H}$ -NMR spectrum of compound **4c**

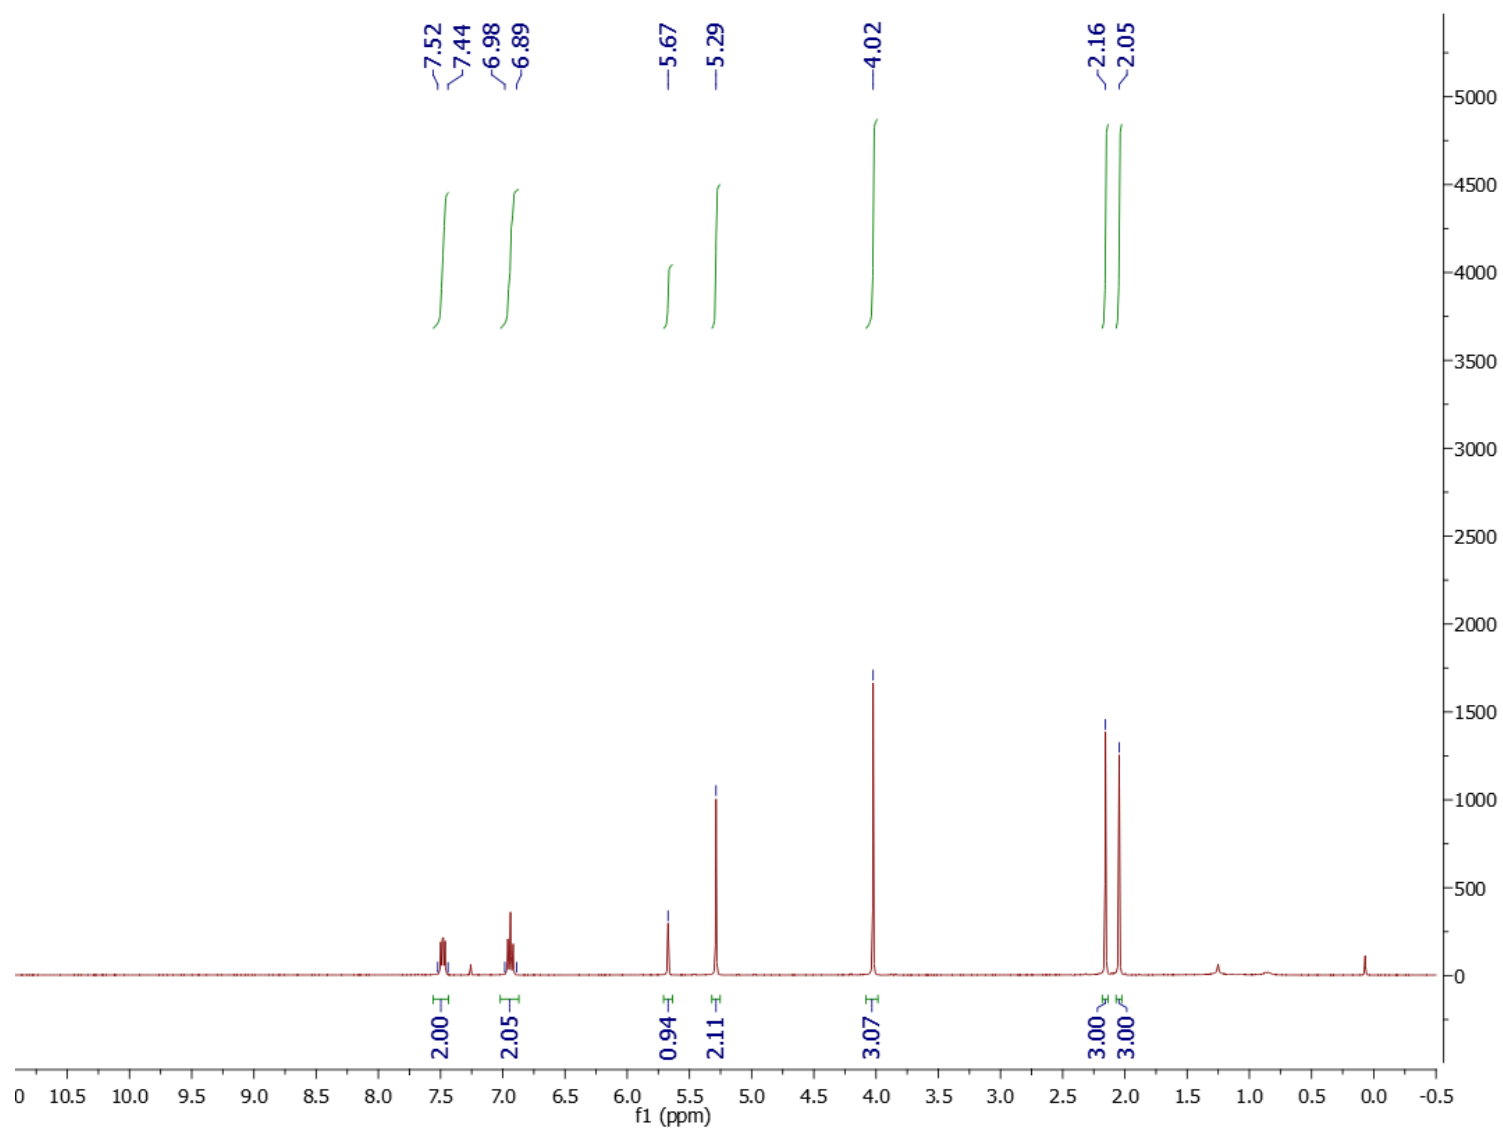

**Data 44.**  $^{13}\text{C}$ -NMR spectrum of compound **4c**

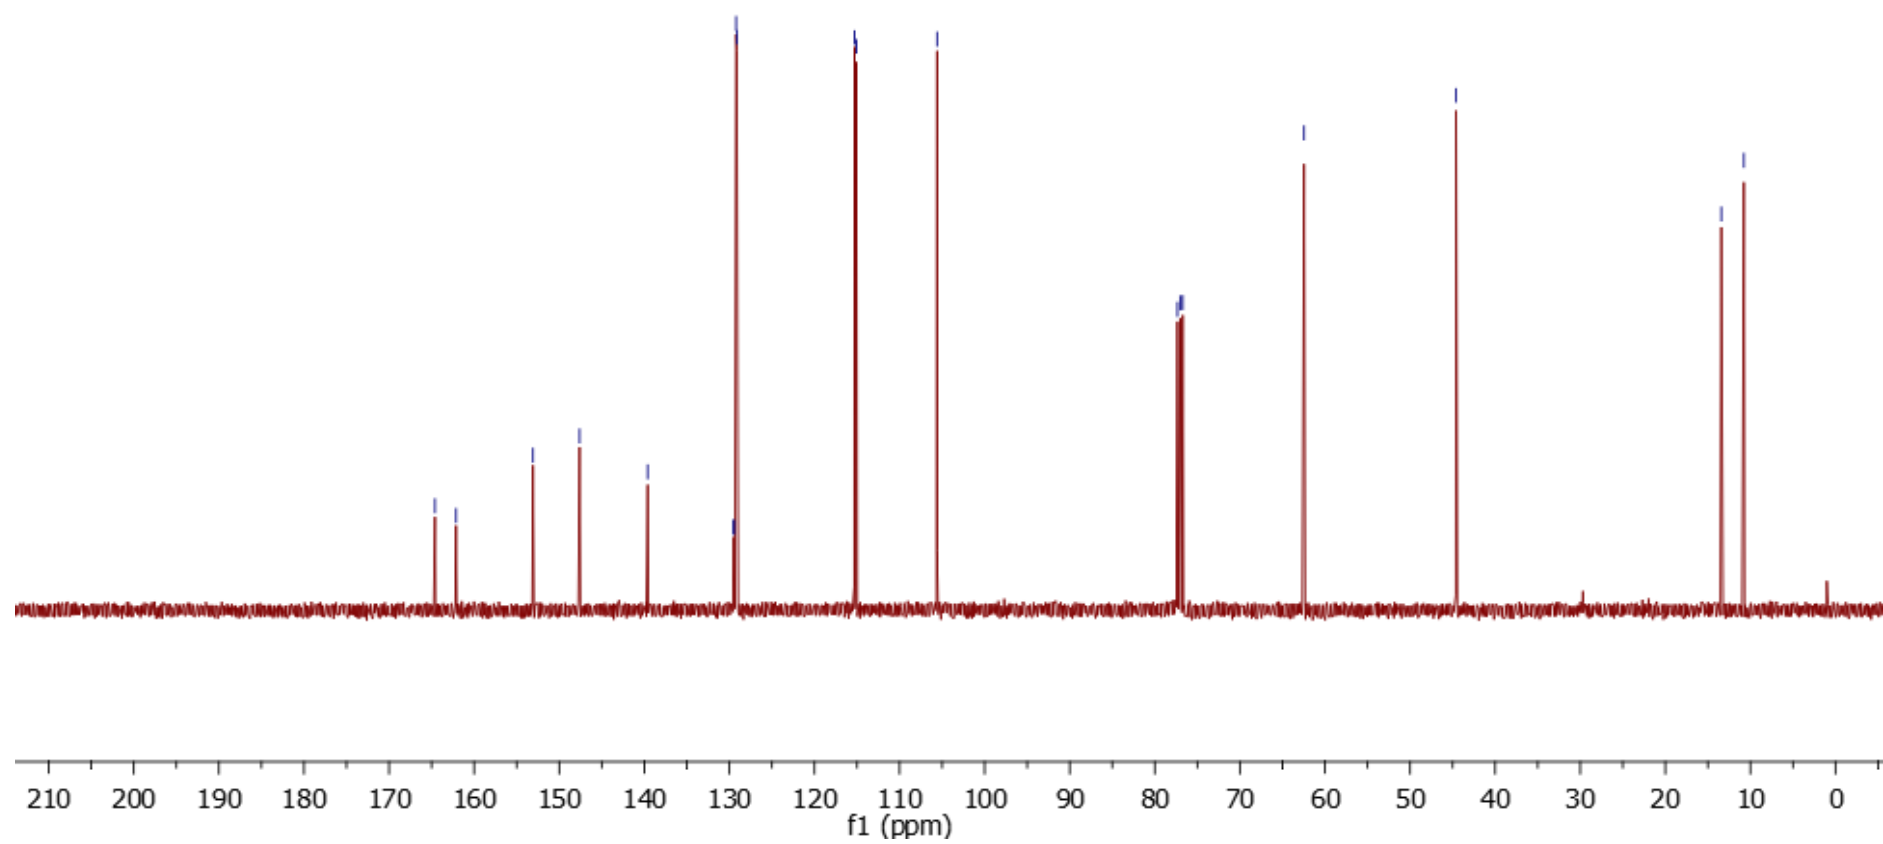

**Data 45. Mass spectrum of compound 4c**

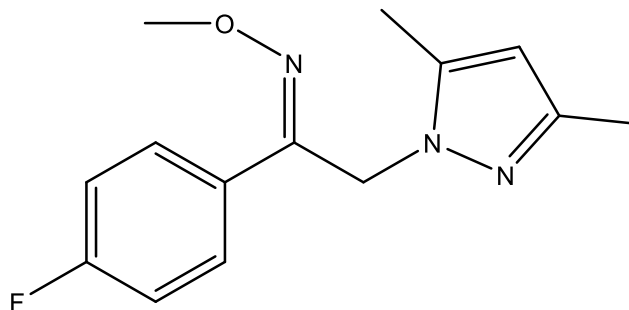

FLMT\_03 157 (5.490)

1: TOF MS ES+  
1.27e5

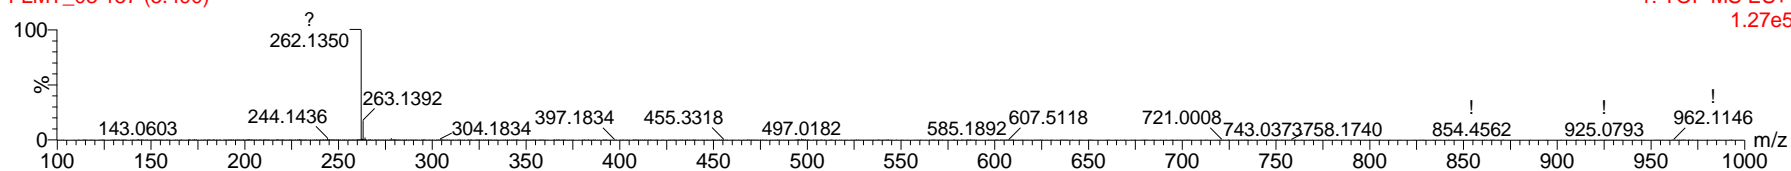

**Data 46.**  $^1\text{H}$ -NMR spectrum of compound 4d

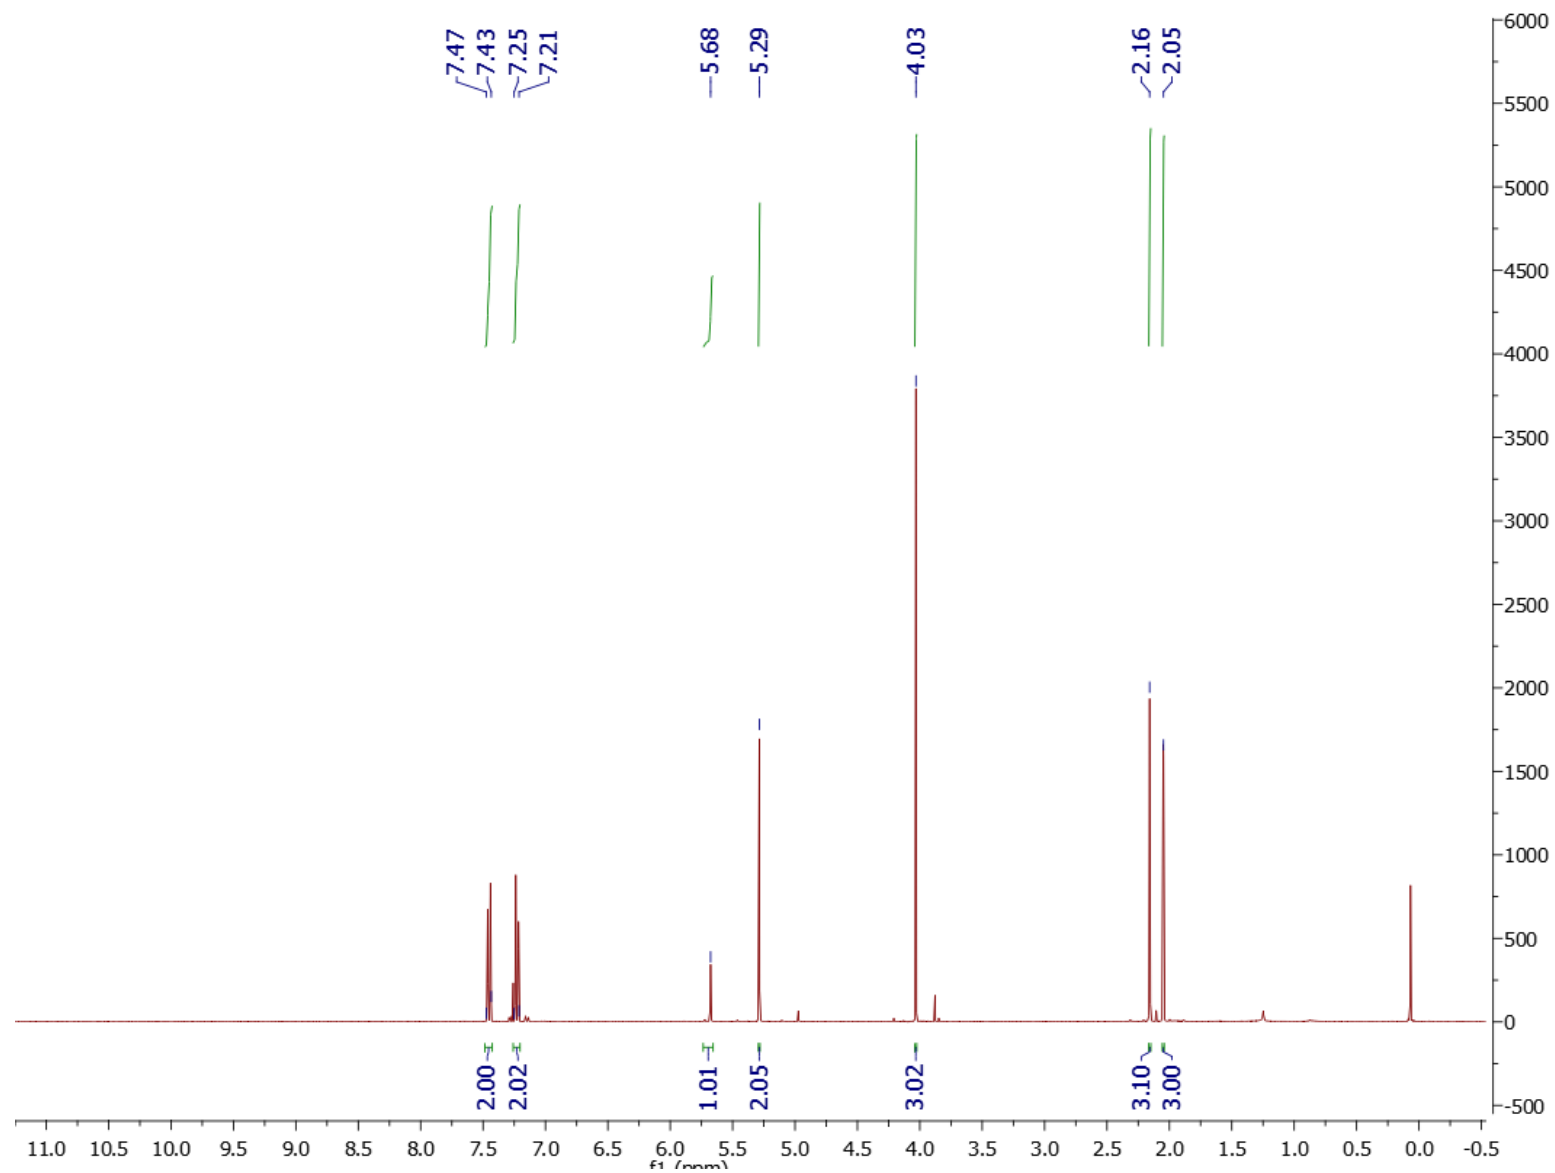



**Data 47.**  $^{13}\text{C}$ -NMR spectrum of compound 4d

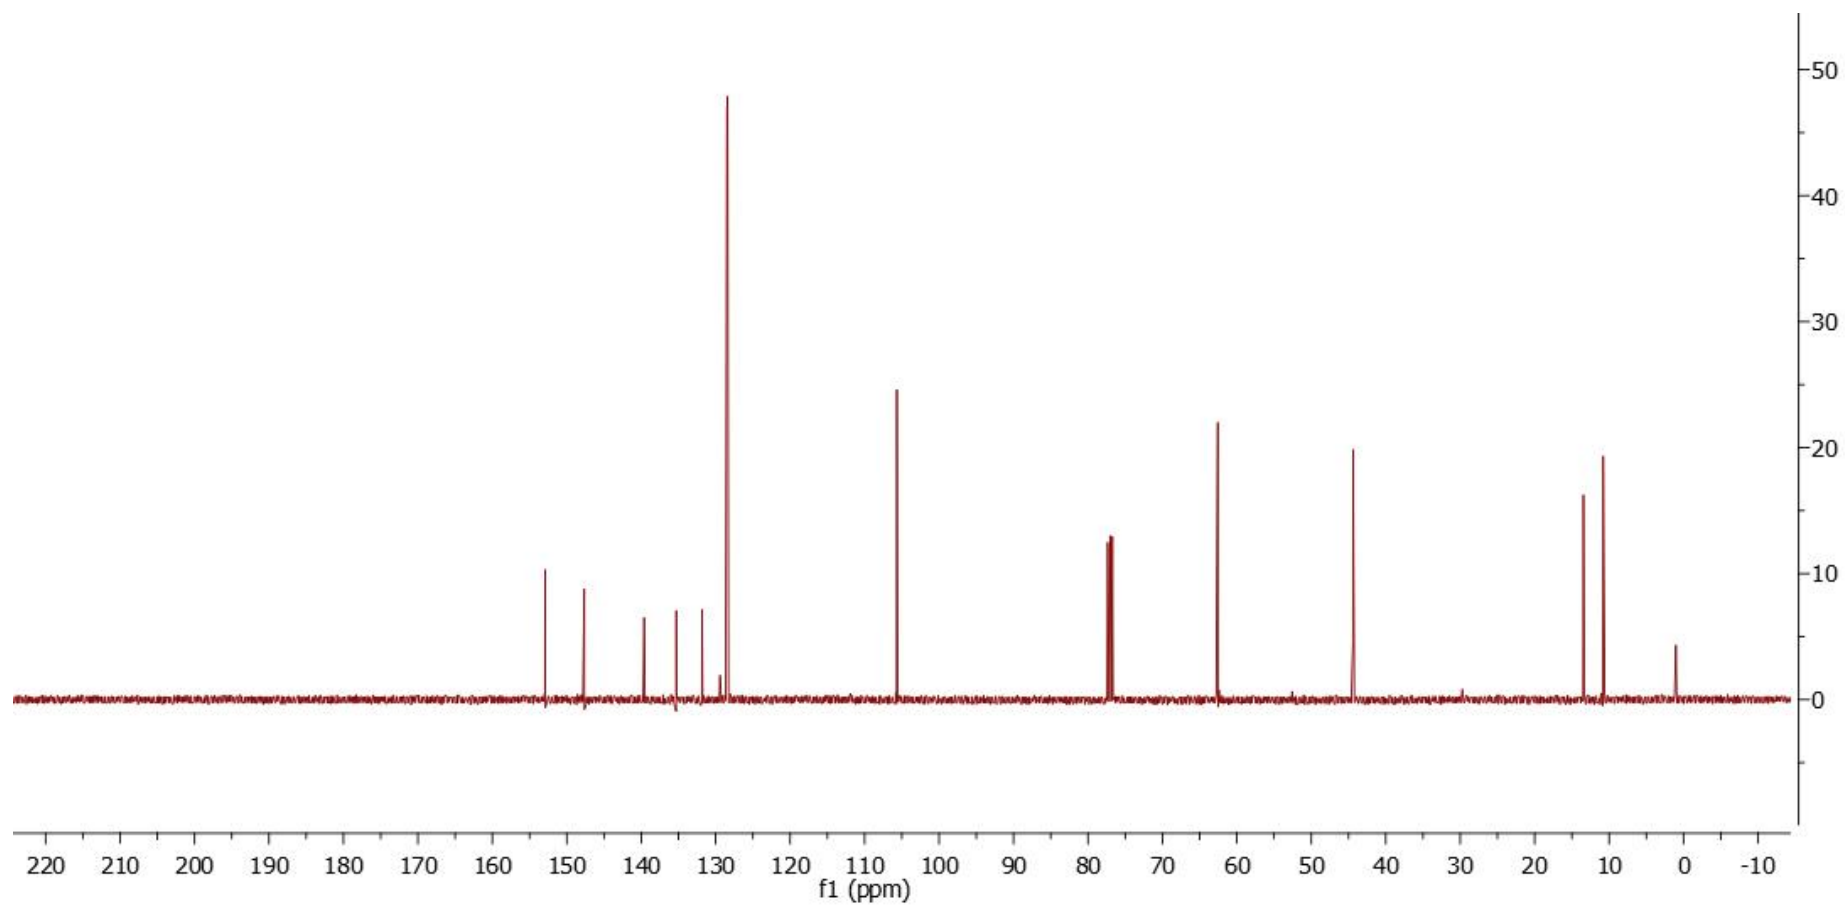

**Data 48. Mass spectrum of compound 4d**

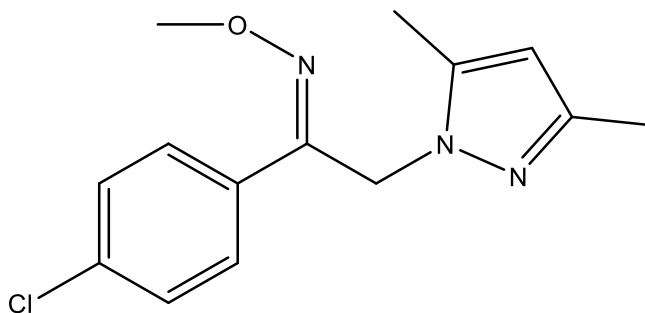

CLMT\_03 166 (5.798)

1: TOF MS ES+  
2.35e4

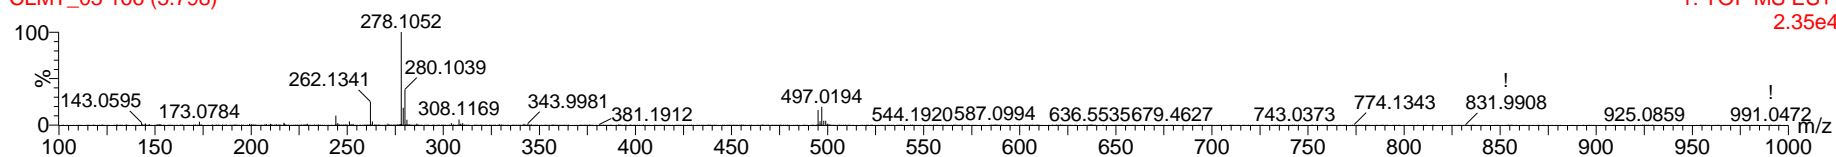

**Data 49.**  $^1\text{H}$ -NMR spectrum of compound **4e**

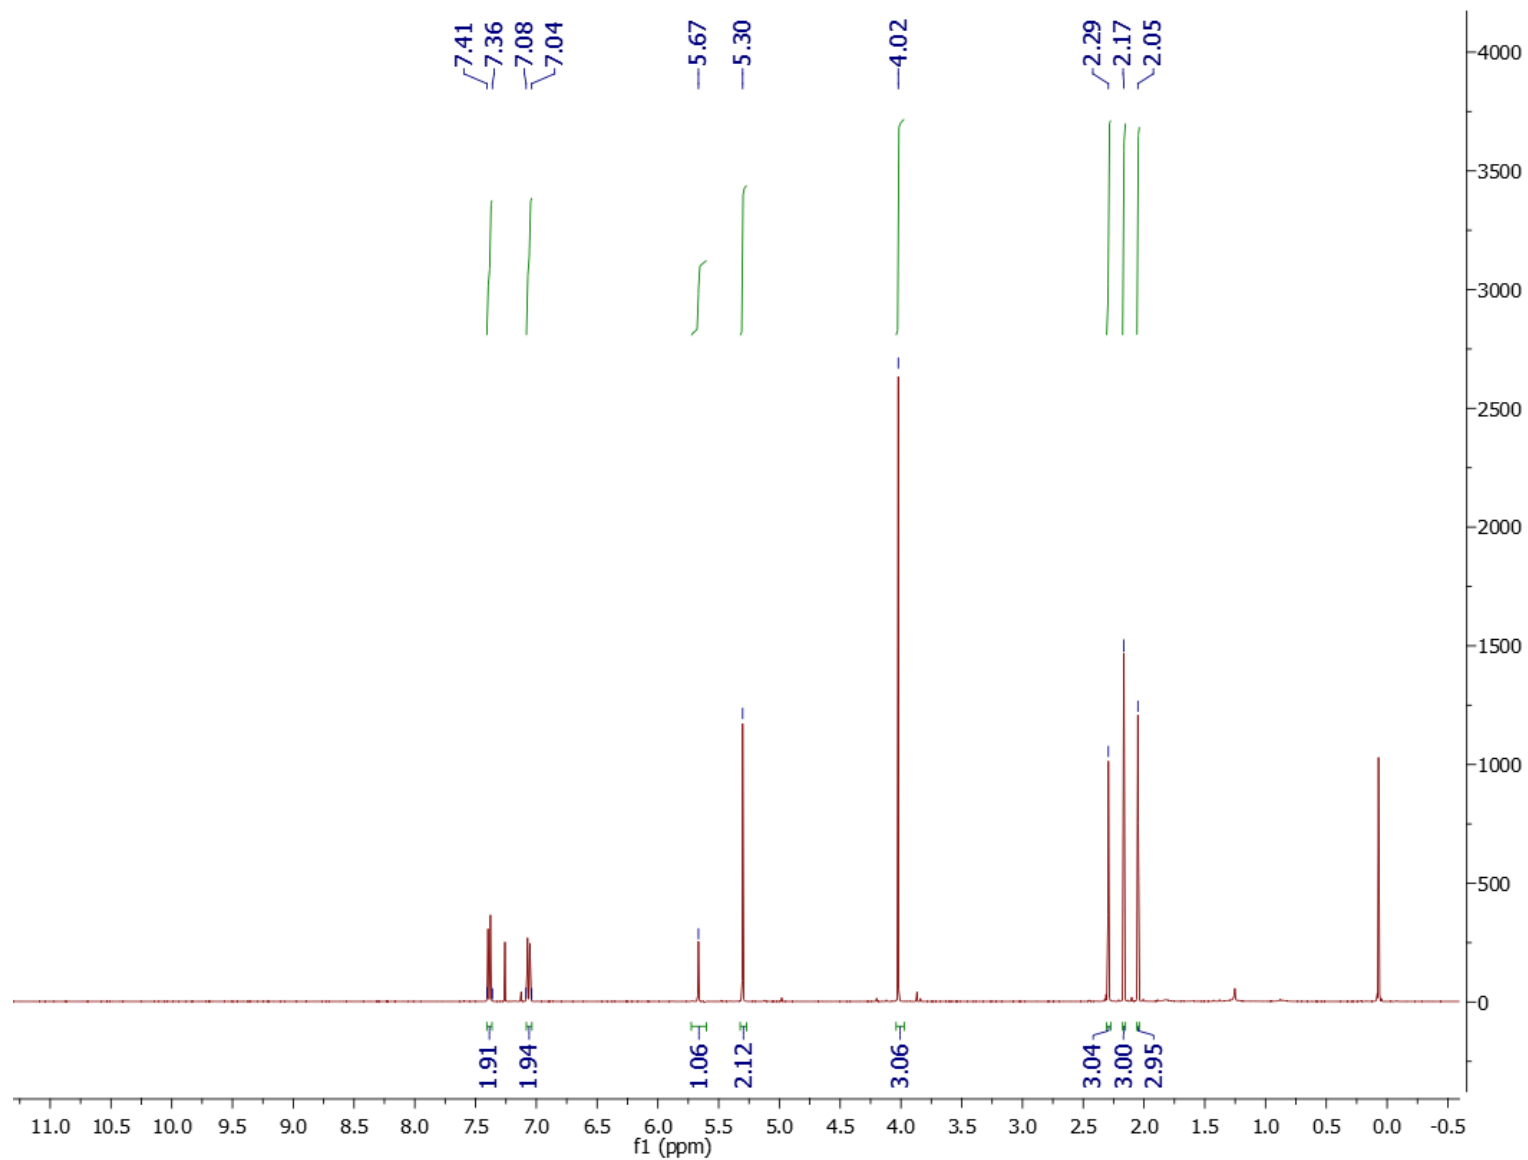

**Data 50.**  $^{13}\text{C}$ -NMR spectrum of compound **4e**

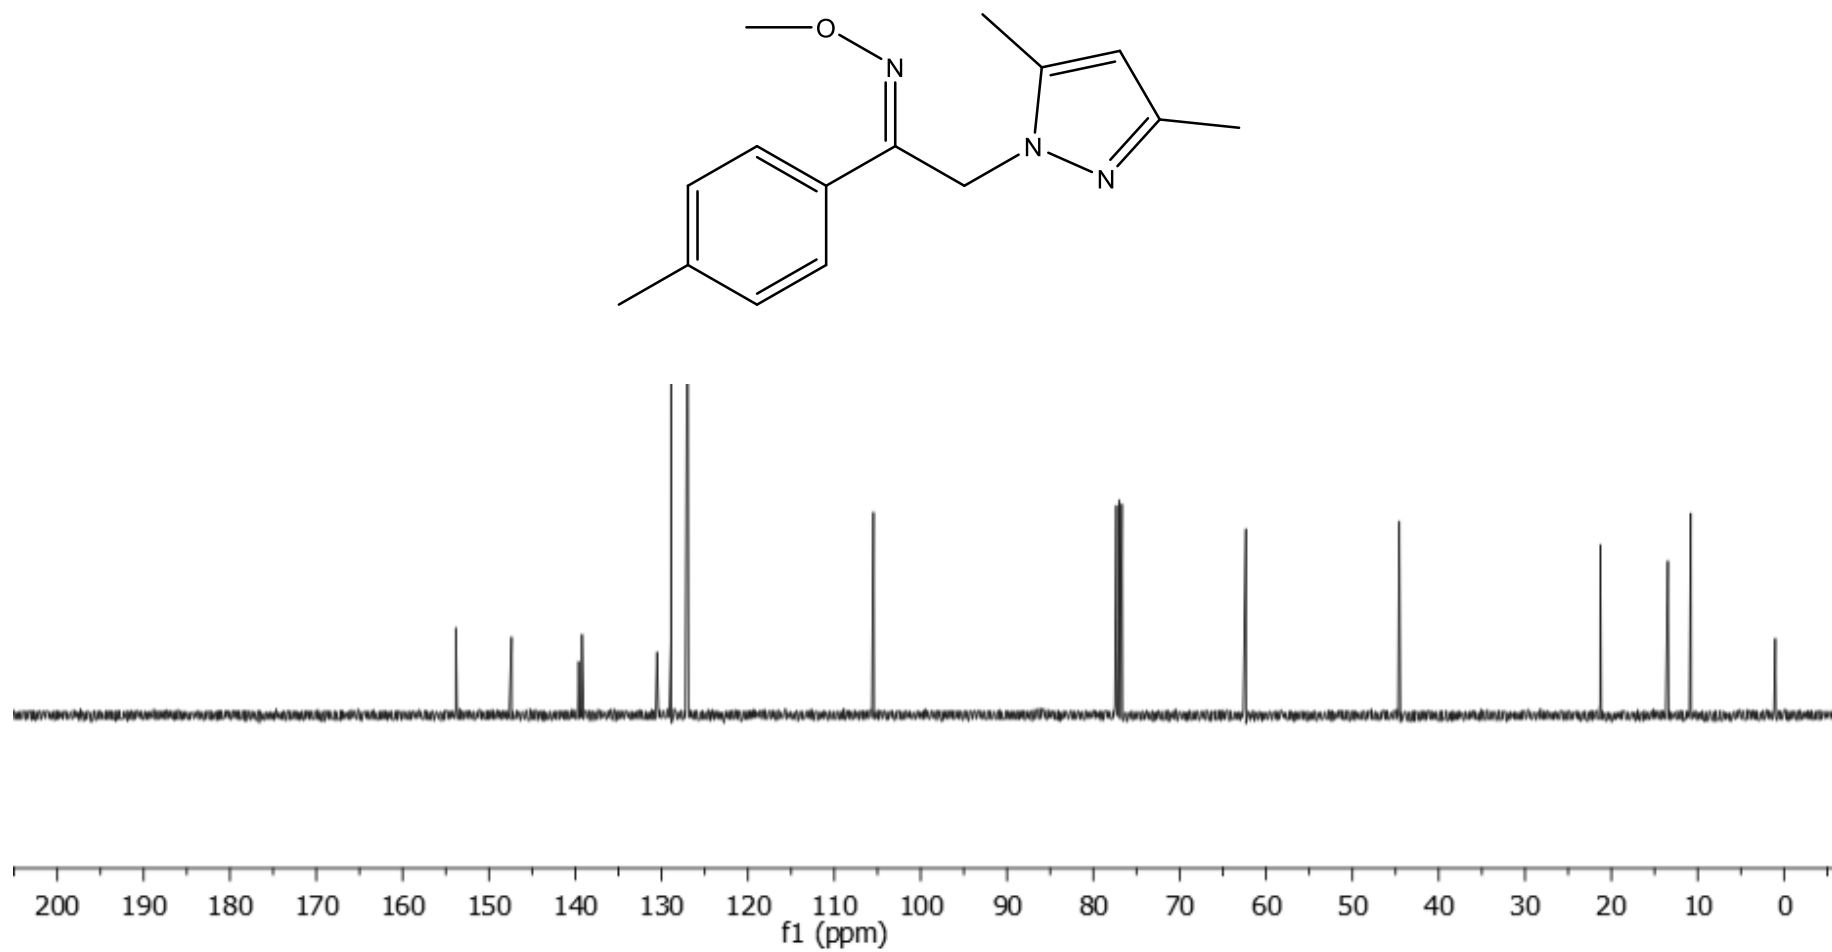

**Data 51. Mass spectrum of compound 4e**

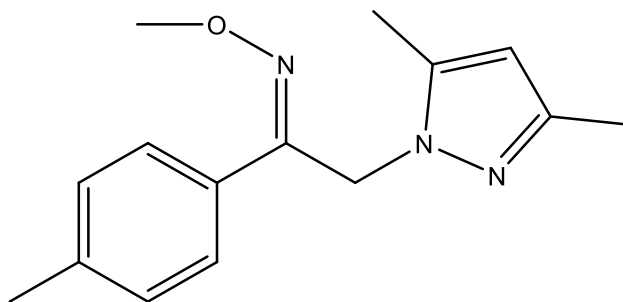

MEMT\_240616\_2 166 (5.799)

1: TOF MS ES+  
5.66e4

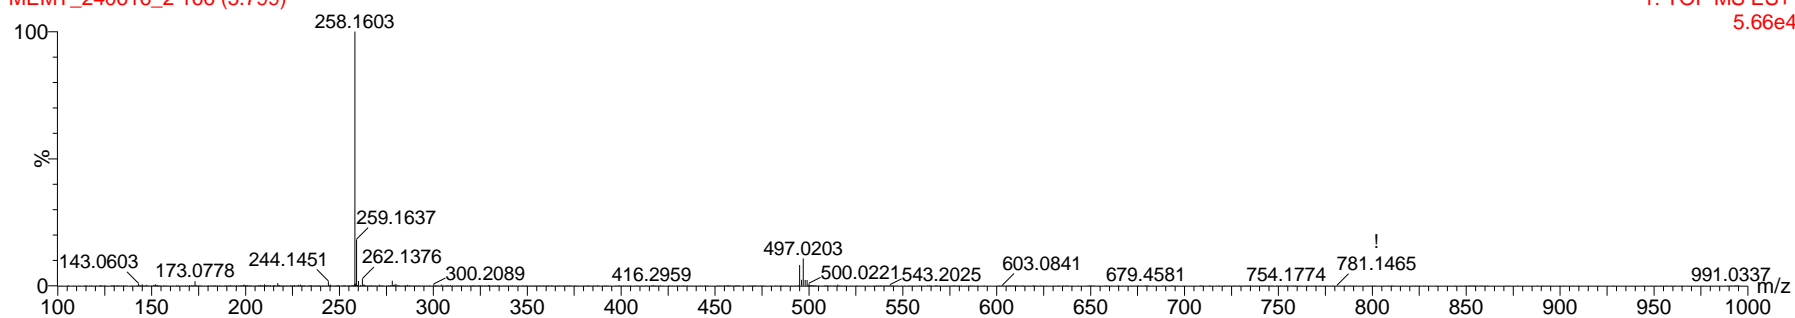

**Data 52.**  $^1\text{H}$ -NMR spectrum of compound 4f

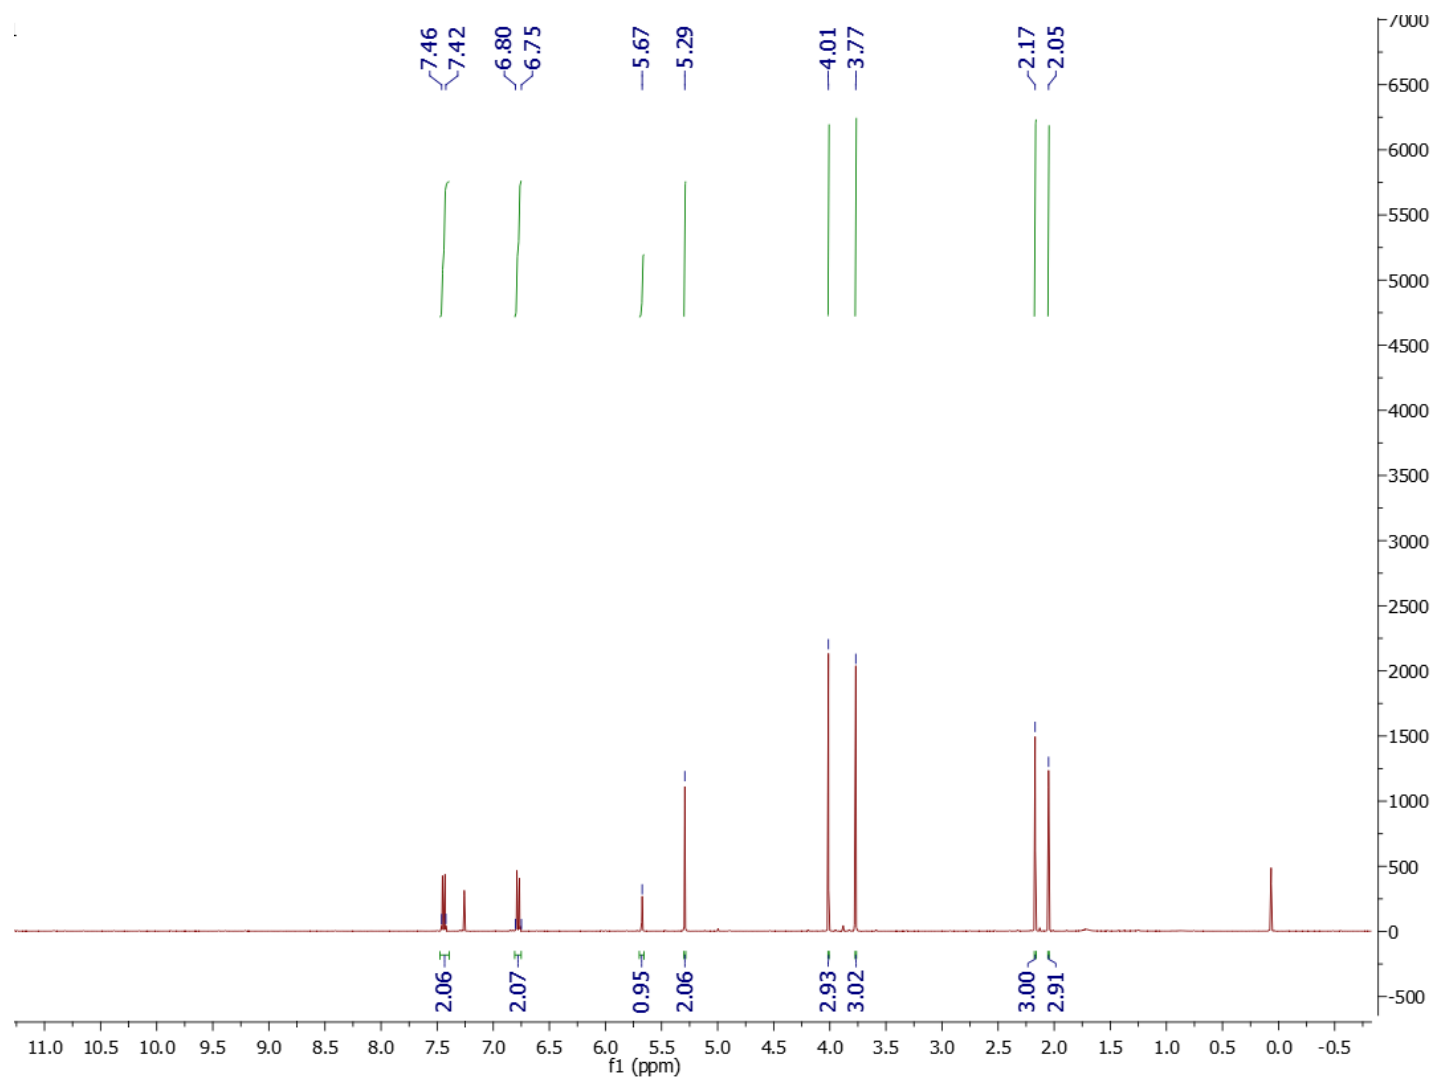

**Data 53.**  $^{13}\text{C}$ -NMR spectrum of compound **4f**

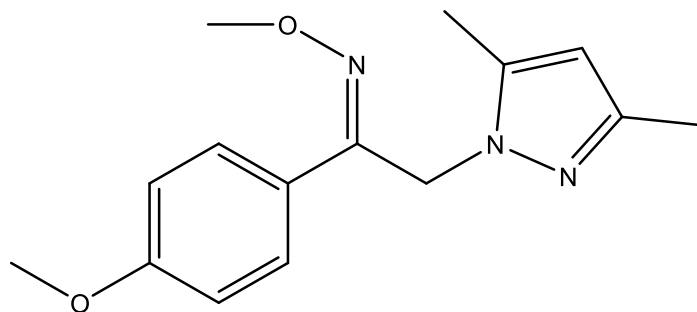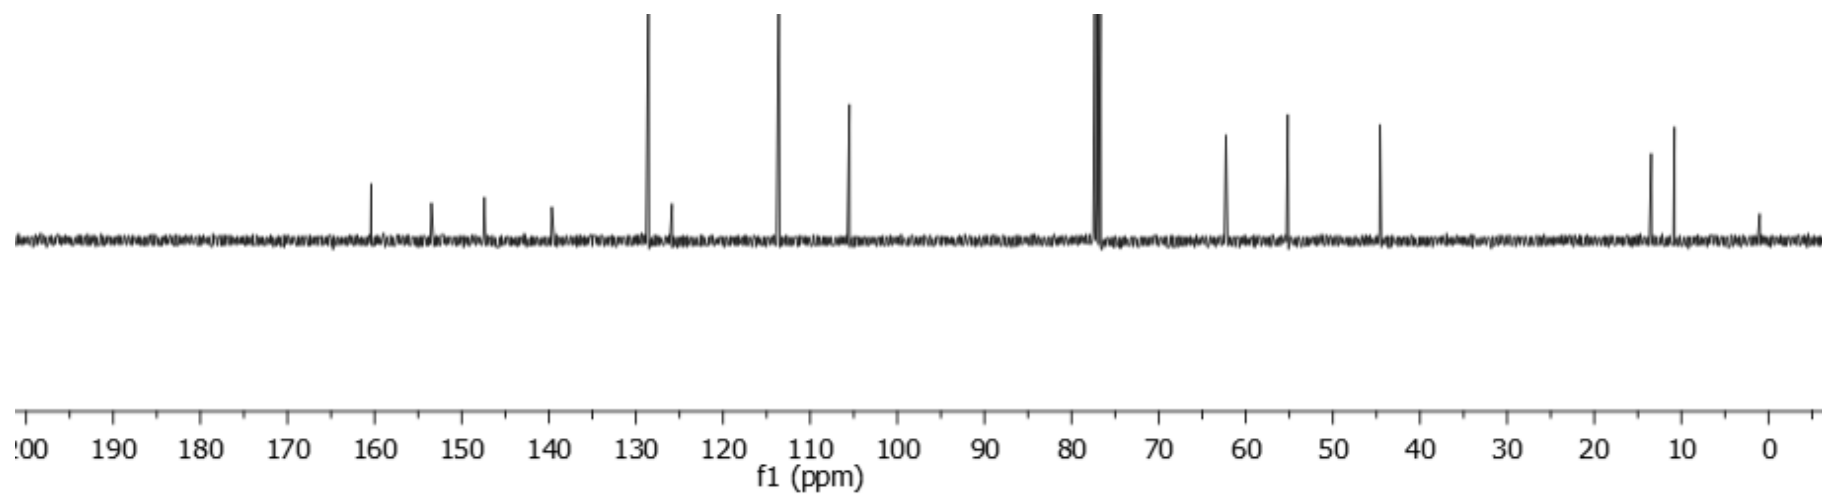

**Data 54. Mass spectrum of compound 4f**

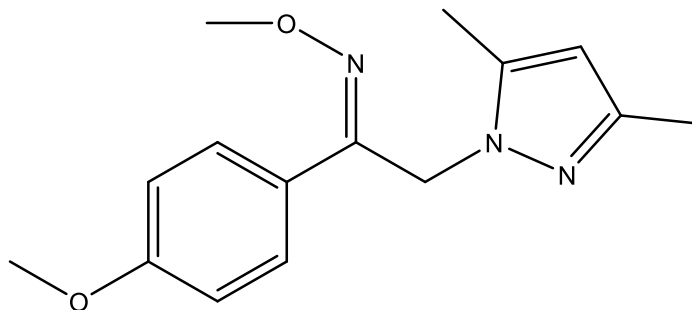

MOMT\_200616 120 (4.173)

1: TOF MS ES+  
8.98e4

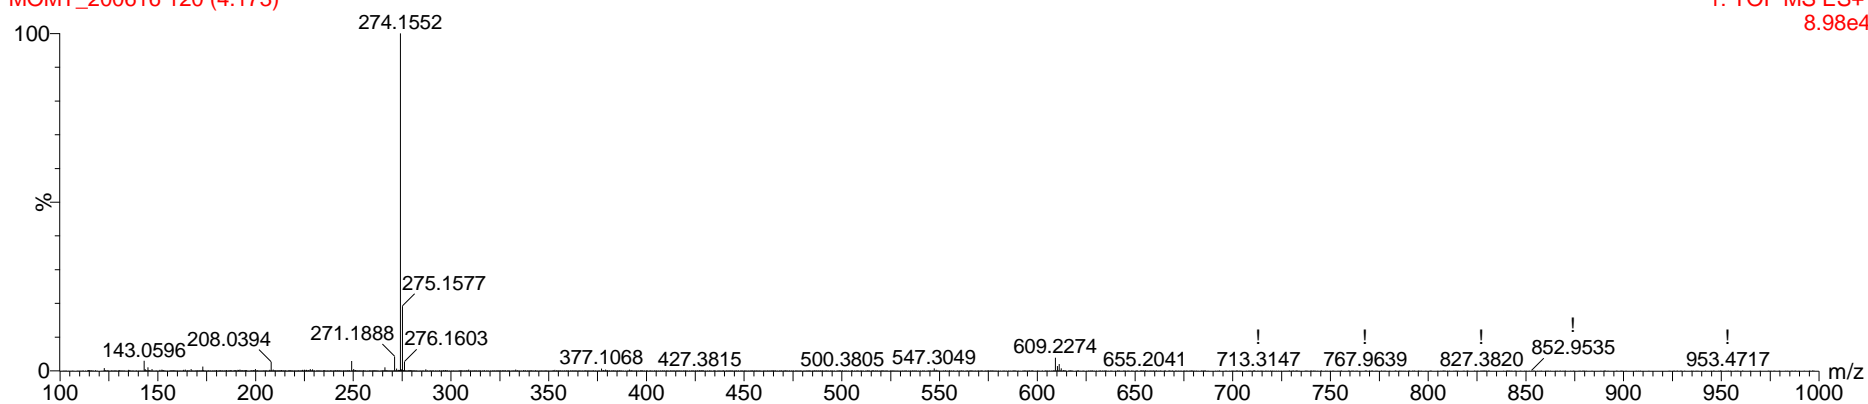



Data 55.  $^1\text{H}$ -NMR spectrum of compound 5a

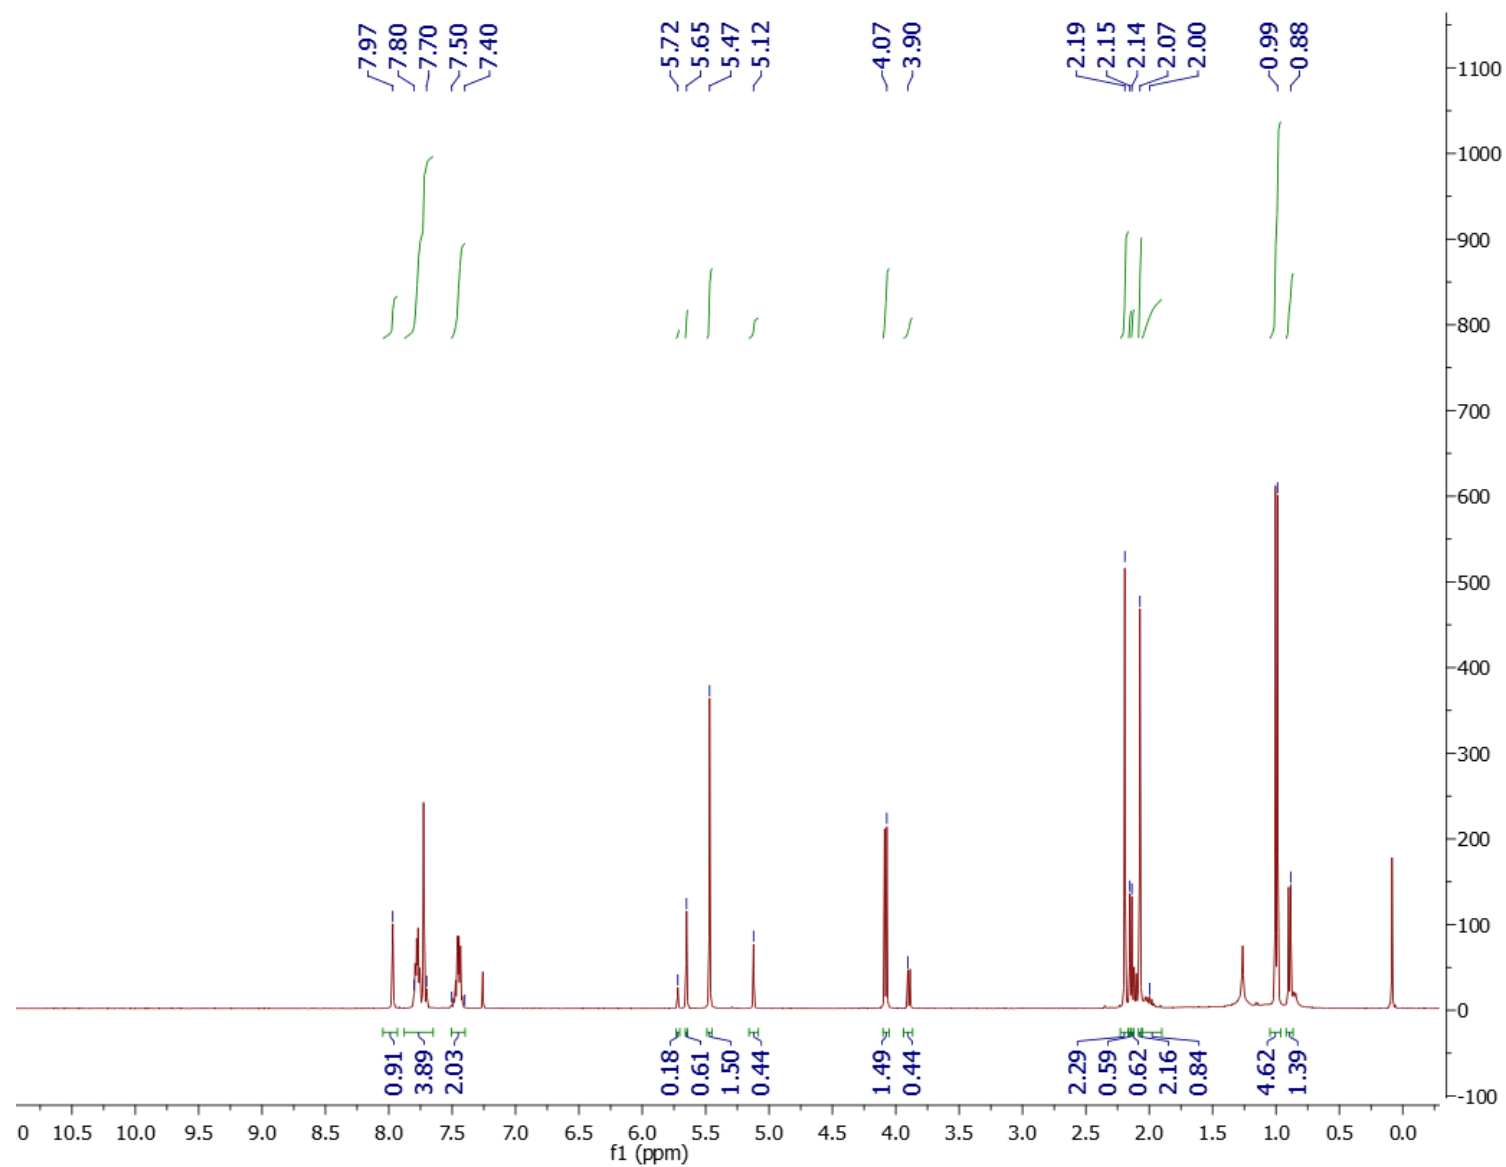

**Data 56.**  $^{13}\text{C}$ -NMR spectrum of compound 5a

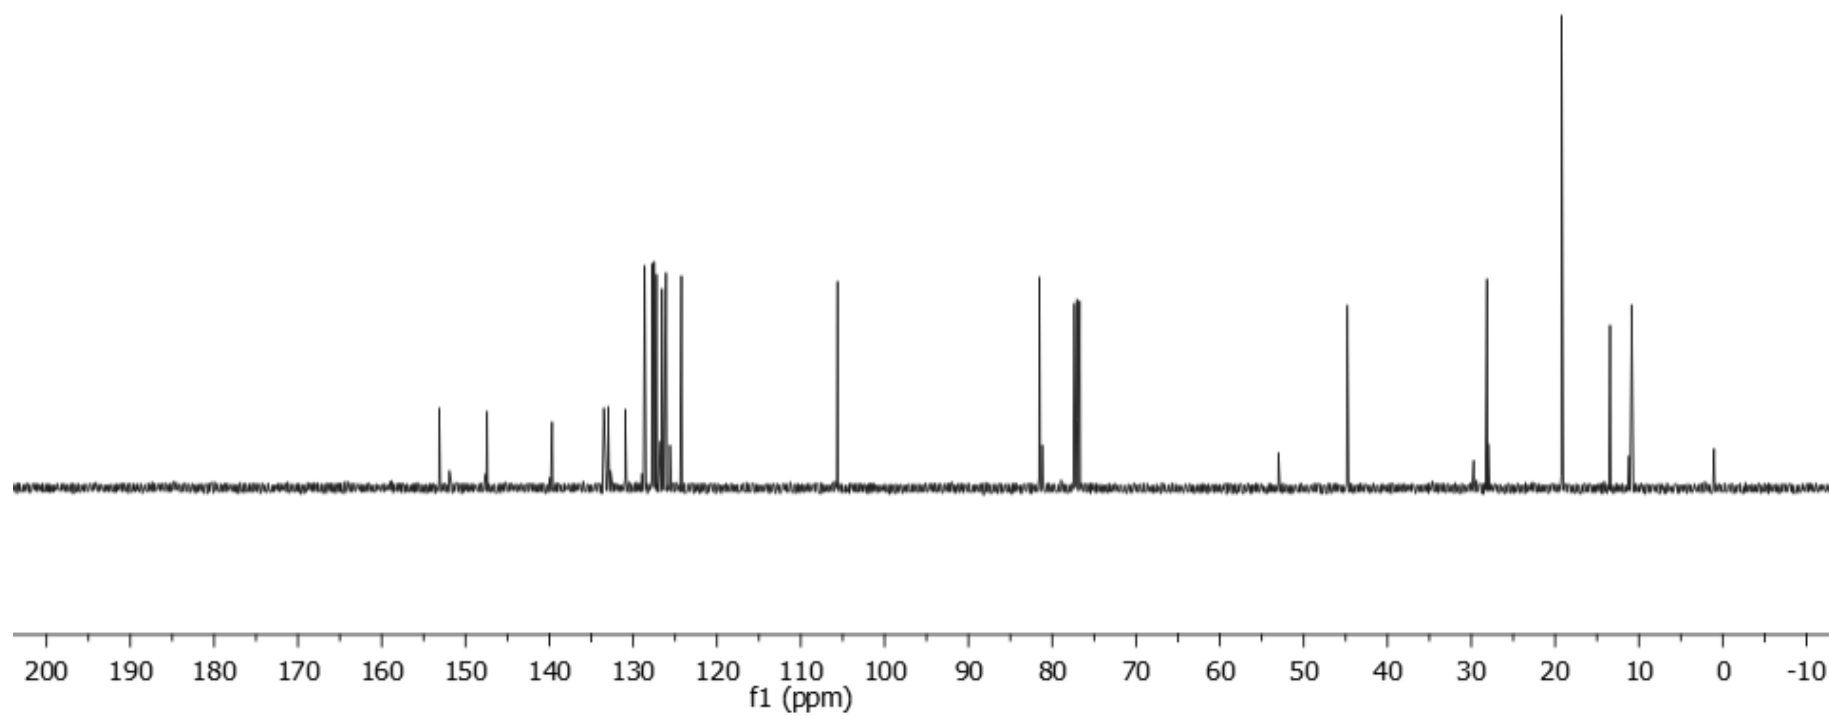

**Data 57. Mass spectrum of compound 5a**

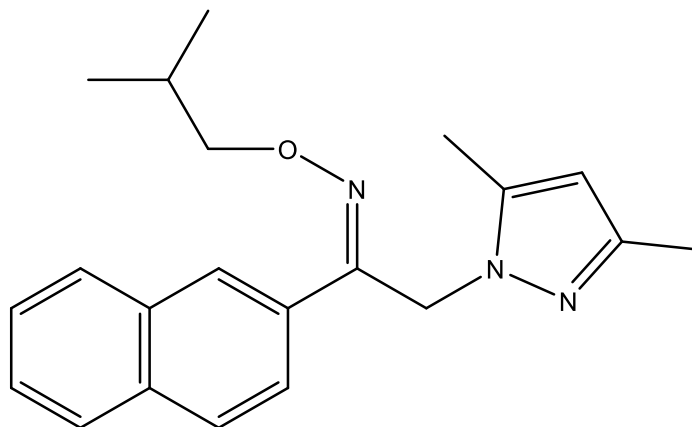

NFIB\_01 199 (6.957) Cm (199-87:105)

1: TOF MS ES+  
1.10e5

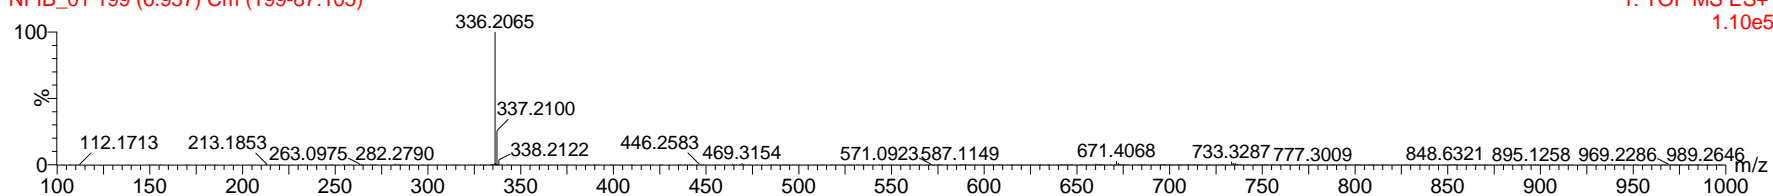

**Data 58.  $^1\text{H}$ -NMR spectrum of compound 5b**

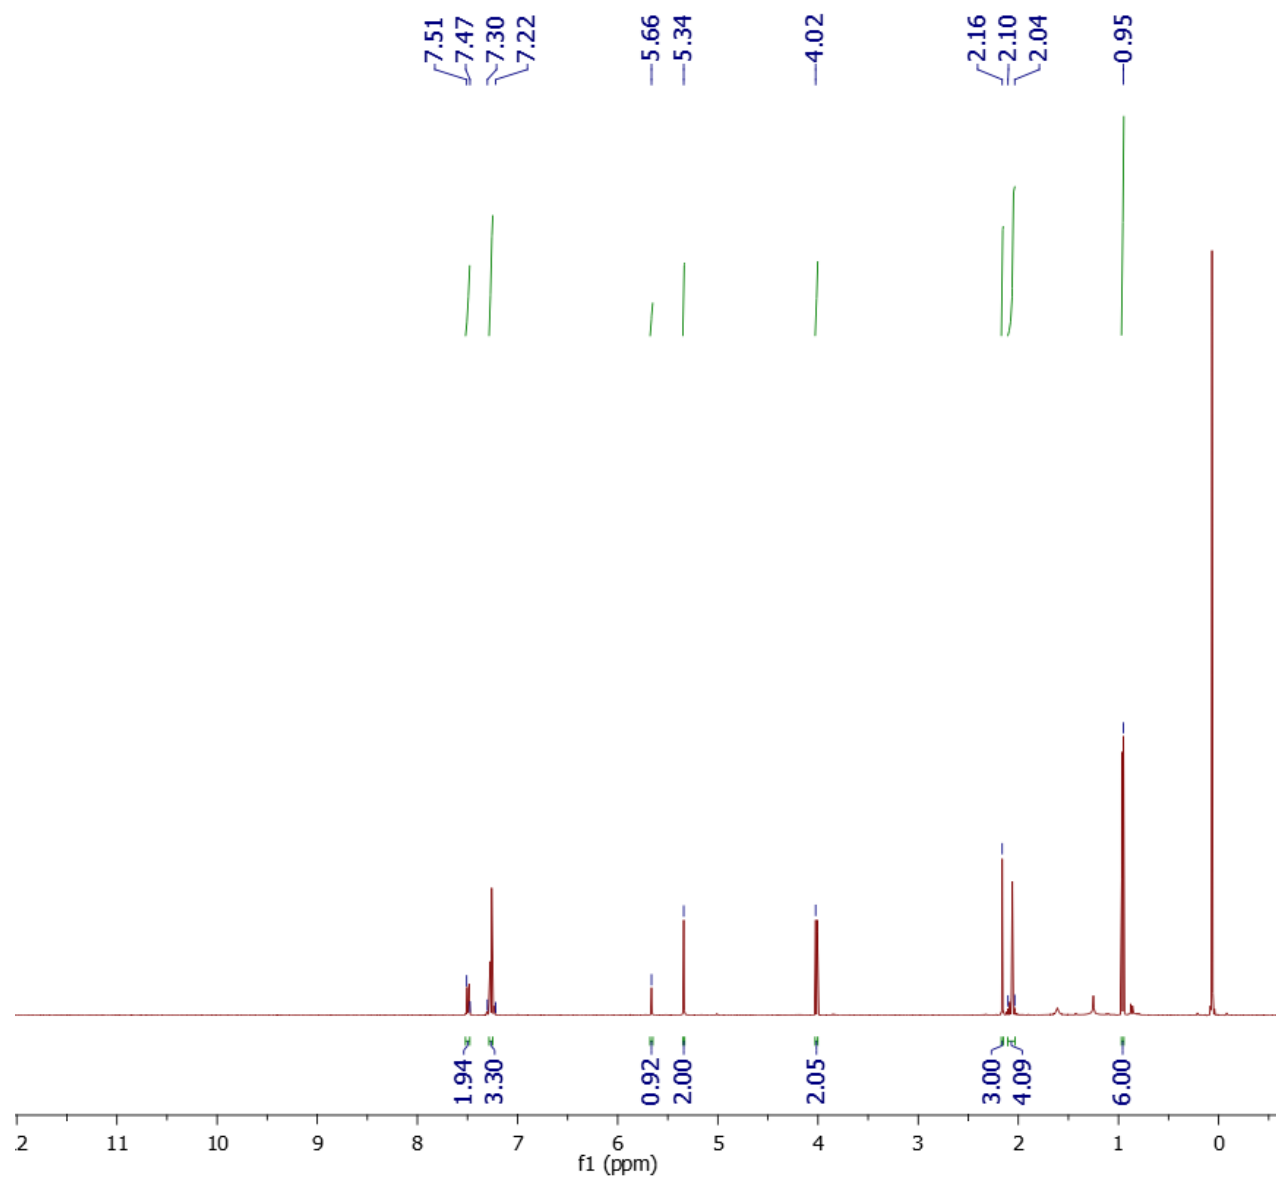

**Data 59.**  $^{13}\text{C}$ -NMR spectrum of compound 5b

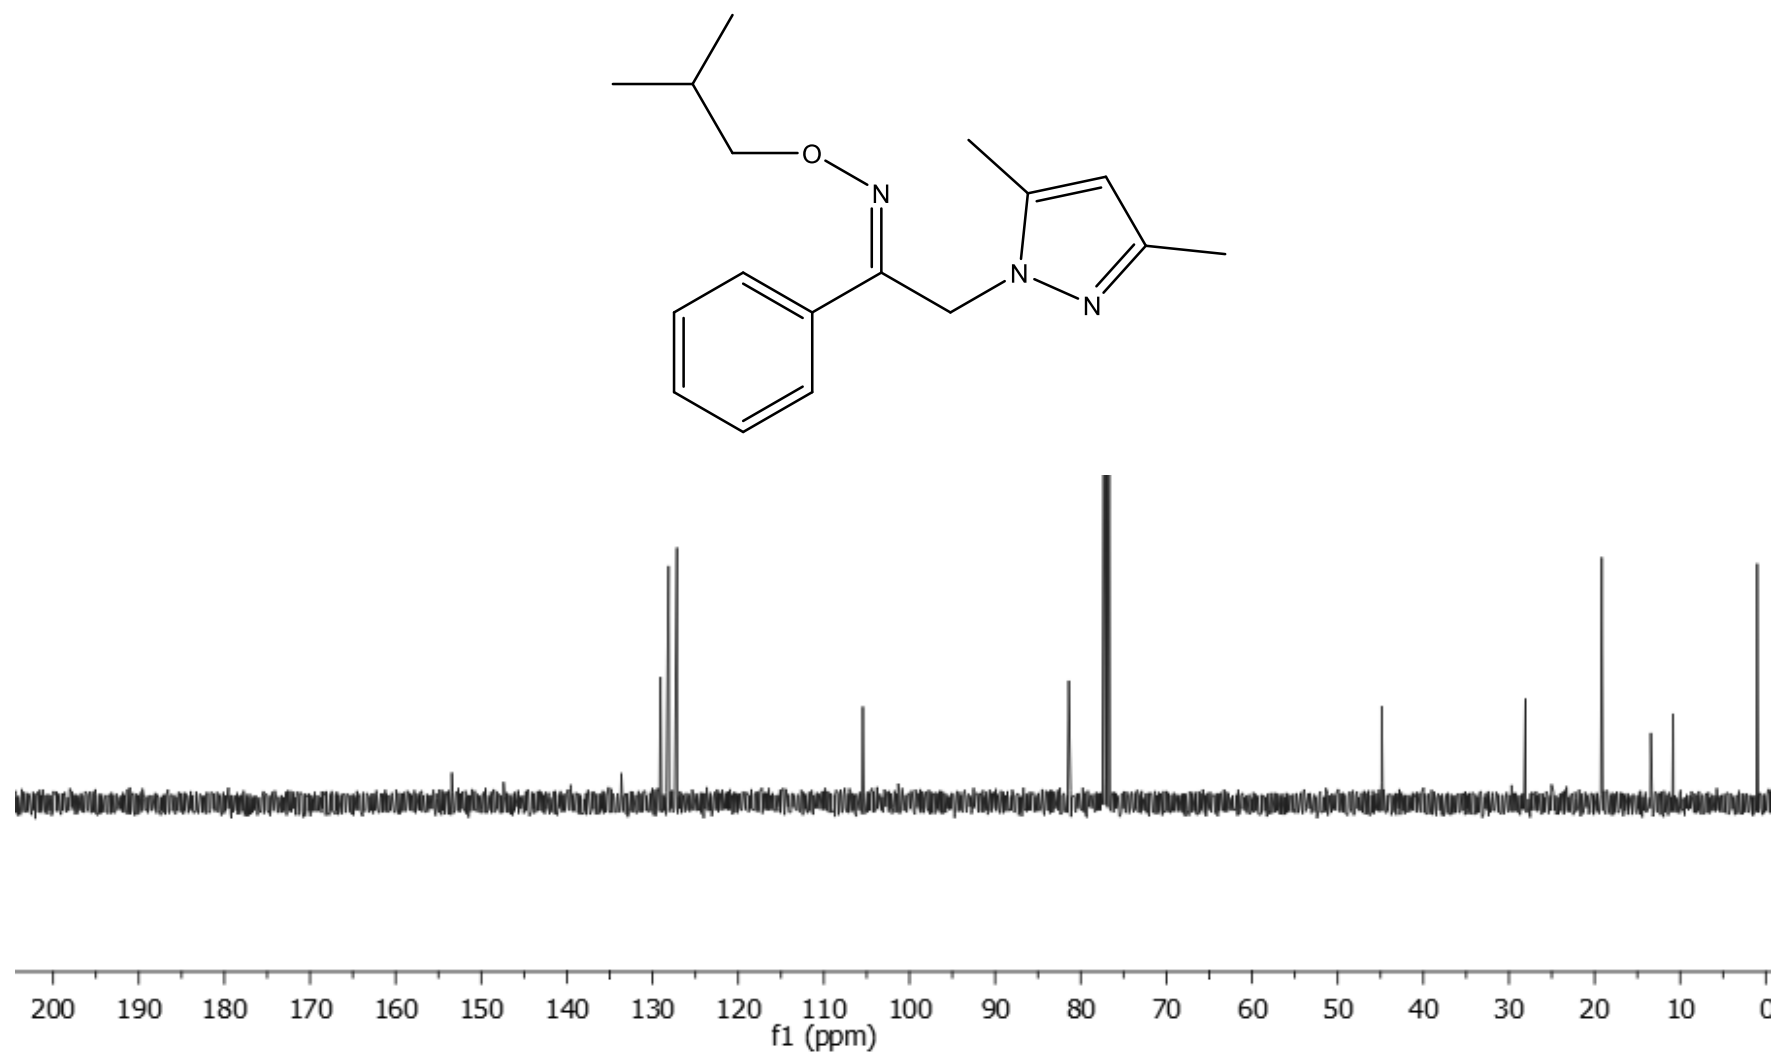

**Data 60. Mass spectrum of compound 5b**

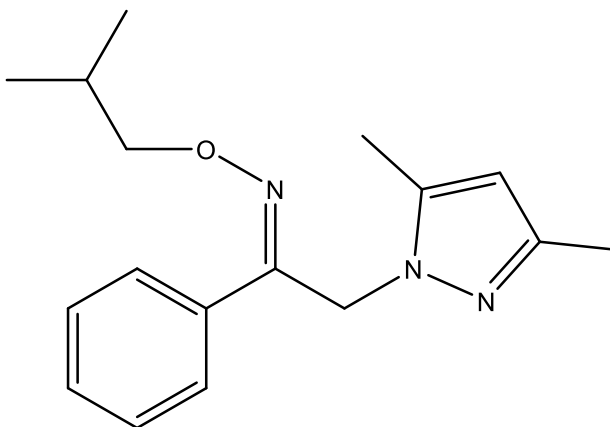

FNIB\_02 205 (7.169)

1: TOF MS ES+  
1.18e5

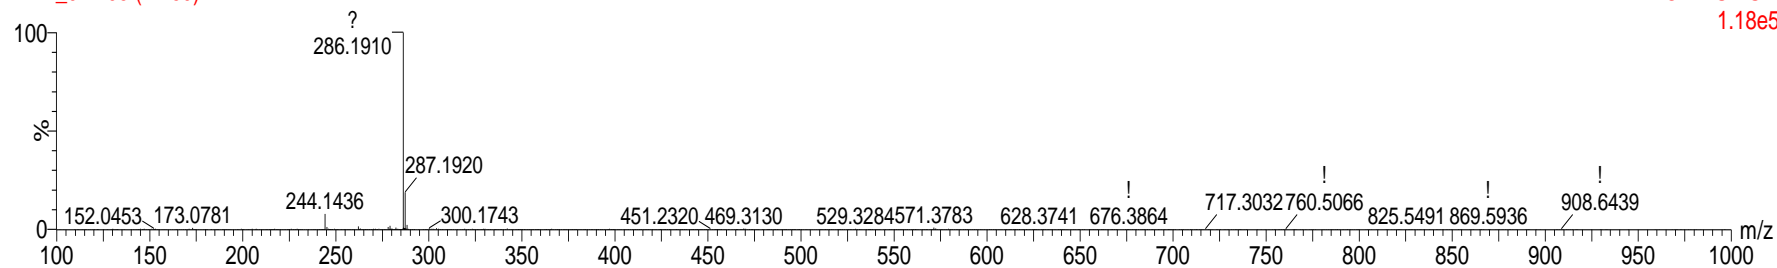

Data 61.  $^1\text{H}$ -NMR spectrum of compound 5c

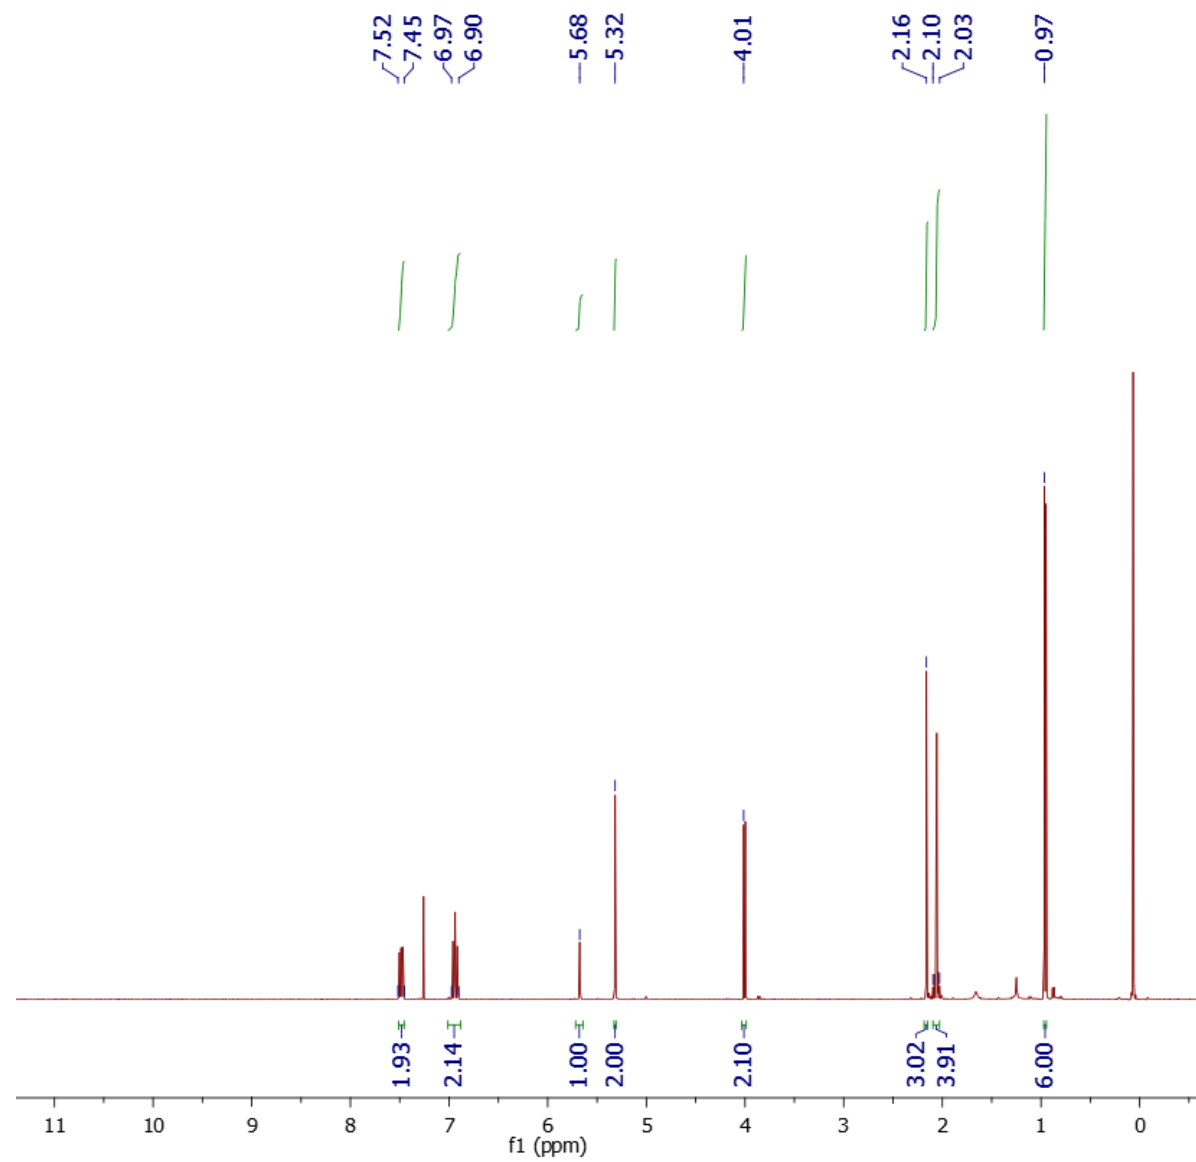

**Data 62.**  $^{13}\text{C}$ -NMR spectrum of compound **5c**

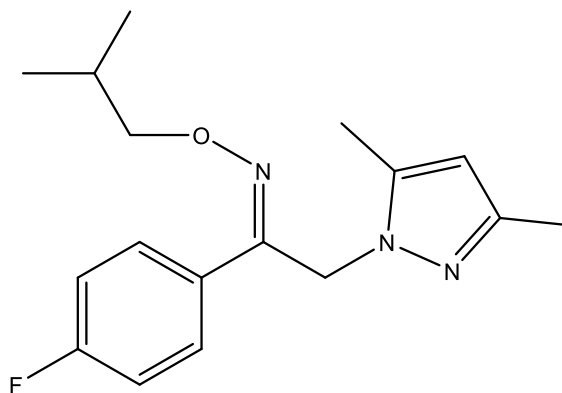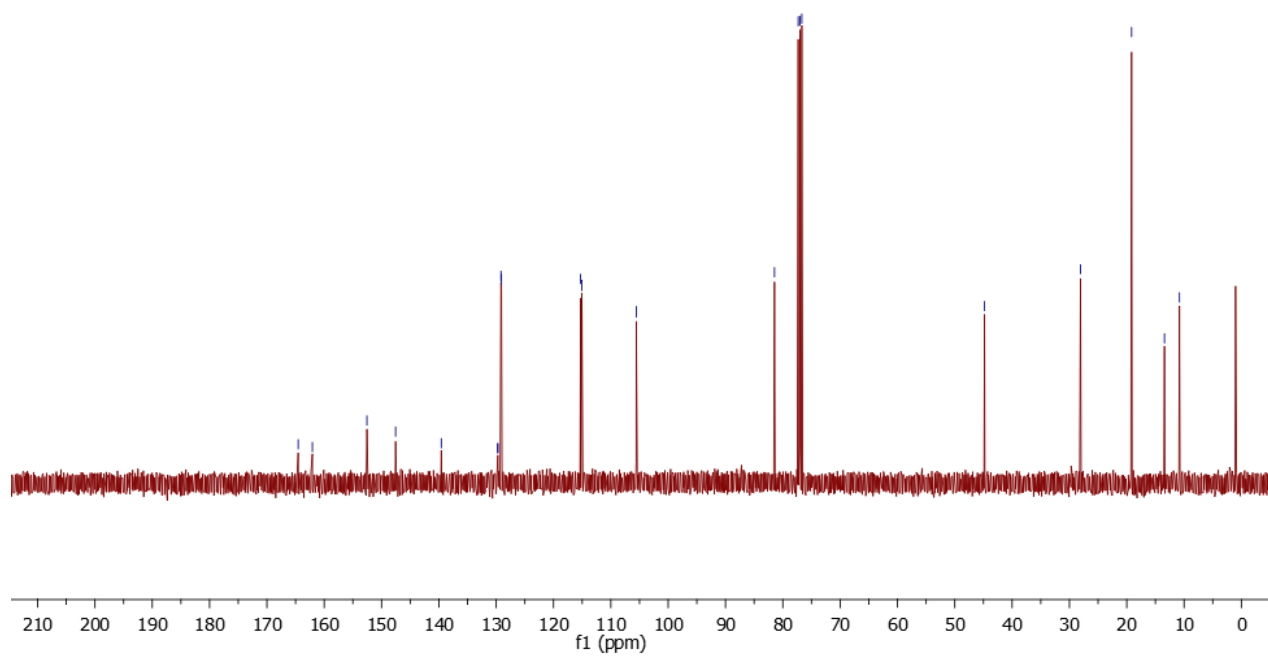



**Data 63. Mass spectrum of compound 5c**

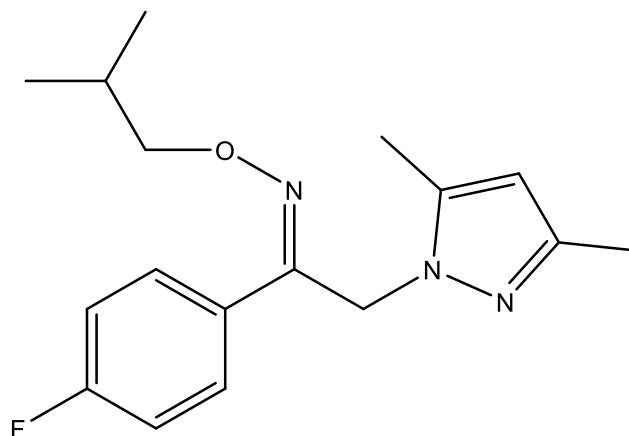

FLIB\_02 210 (7.338)

1: TOF MS E  
8.1

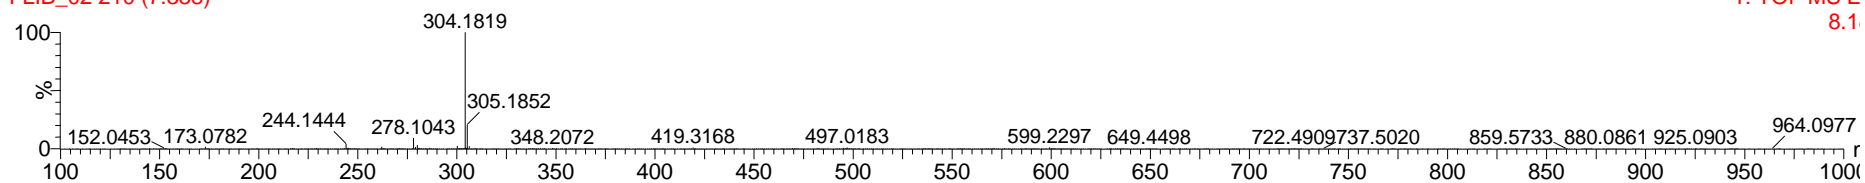

**Data 64.**  $^1\text{H}$ -NMR spectrum of compound 5d

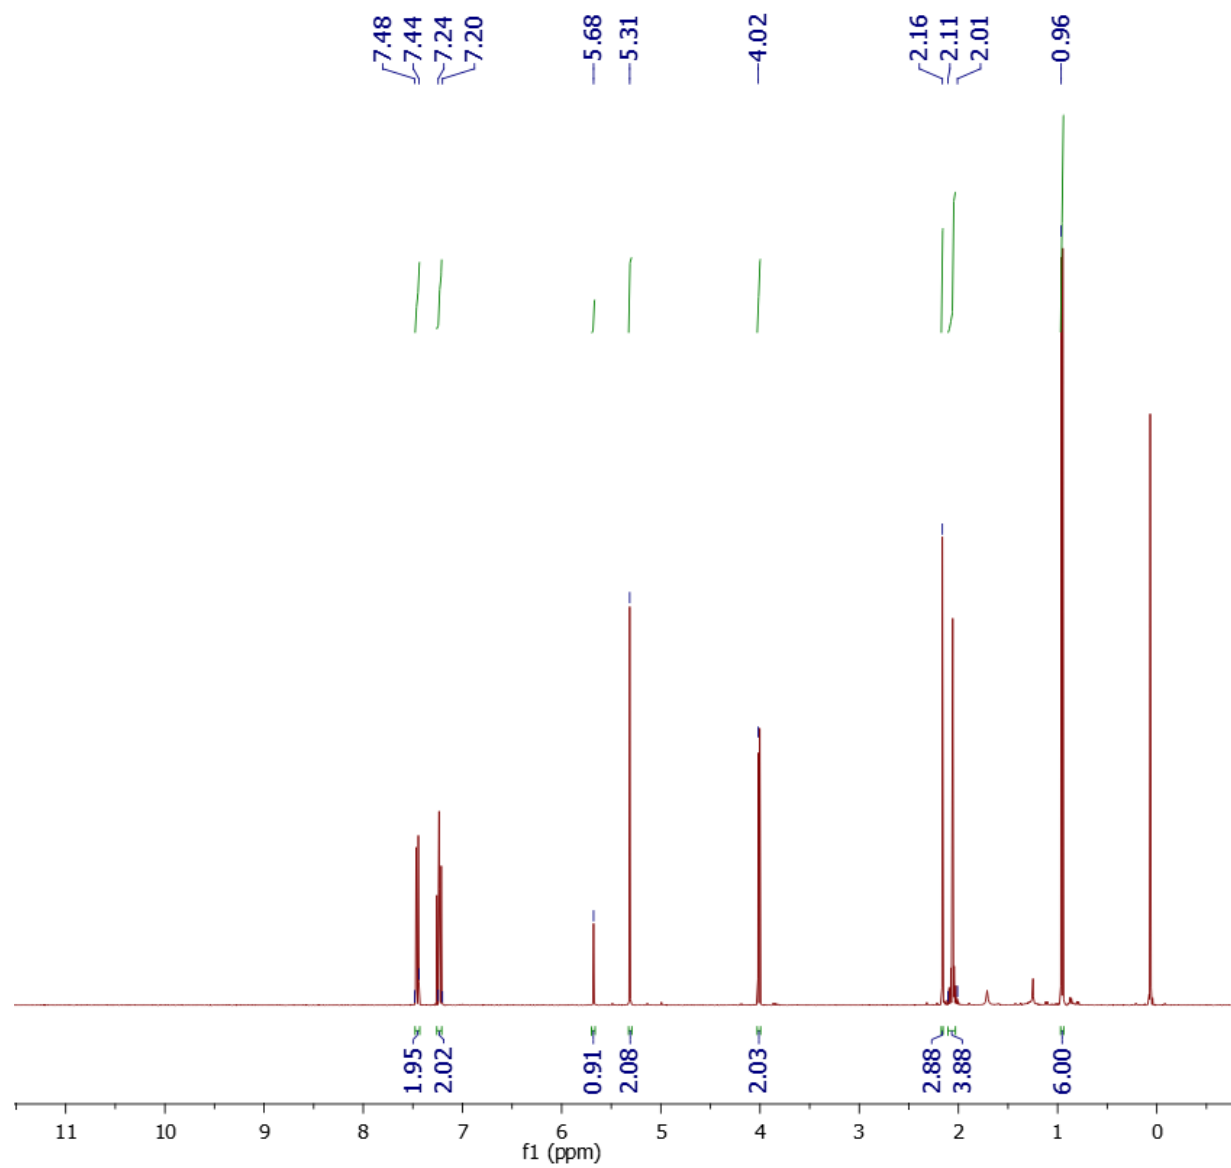

Data 65.  $^{13}\text{C}$ -NMR spectrum of compound 5d

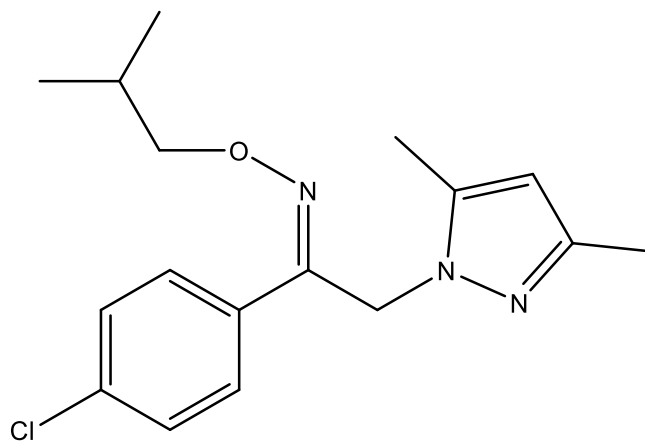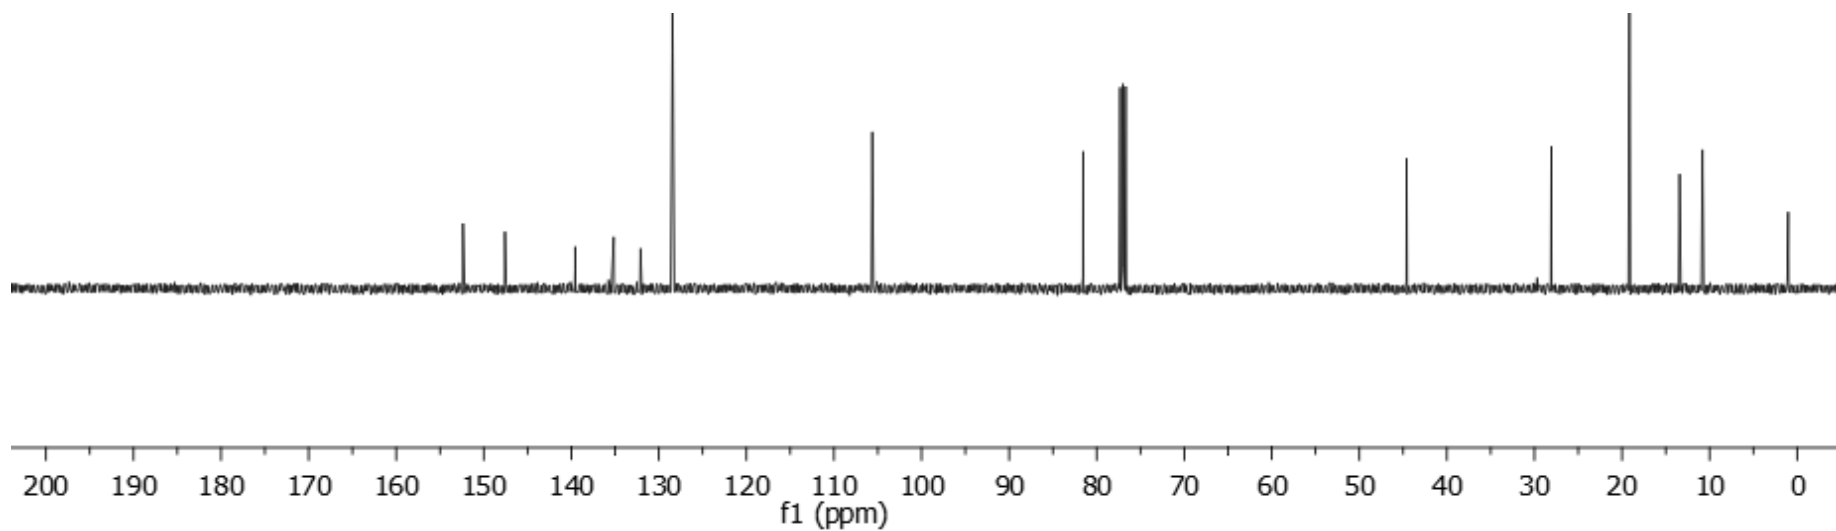

**Data 66. Mass spectrum of compound 5d**

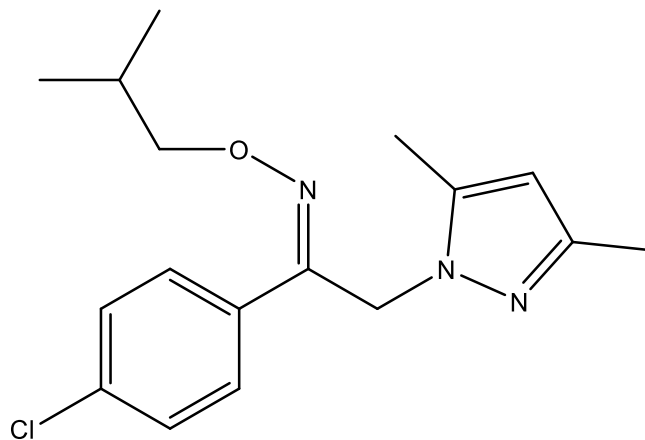

CLIB 202 (7.062)

1: TOF MS ES+  
1.24e4

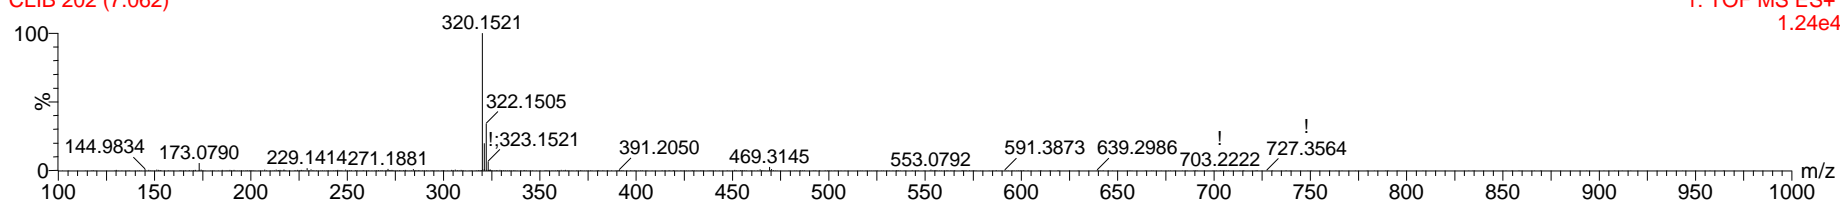

**Data 67.  $^1\text{H}$ -NMR spectrum of compound 5e**

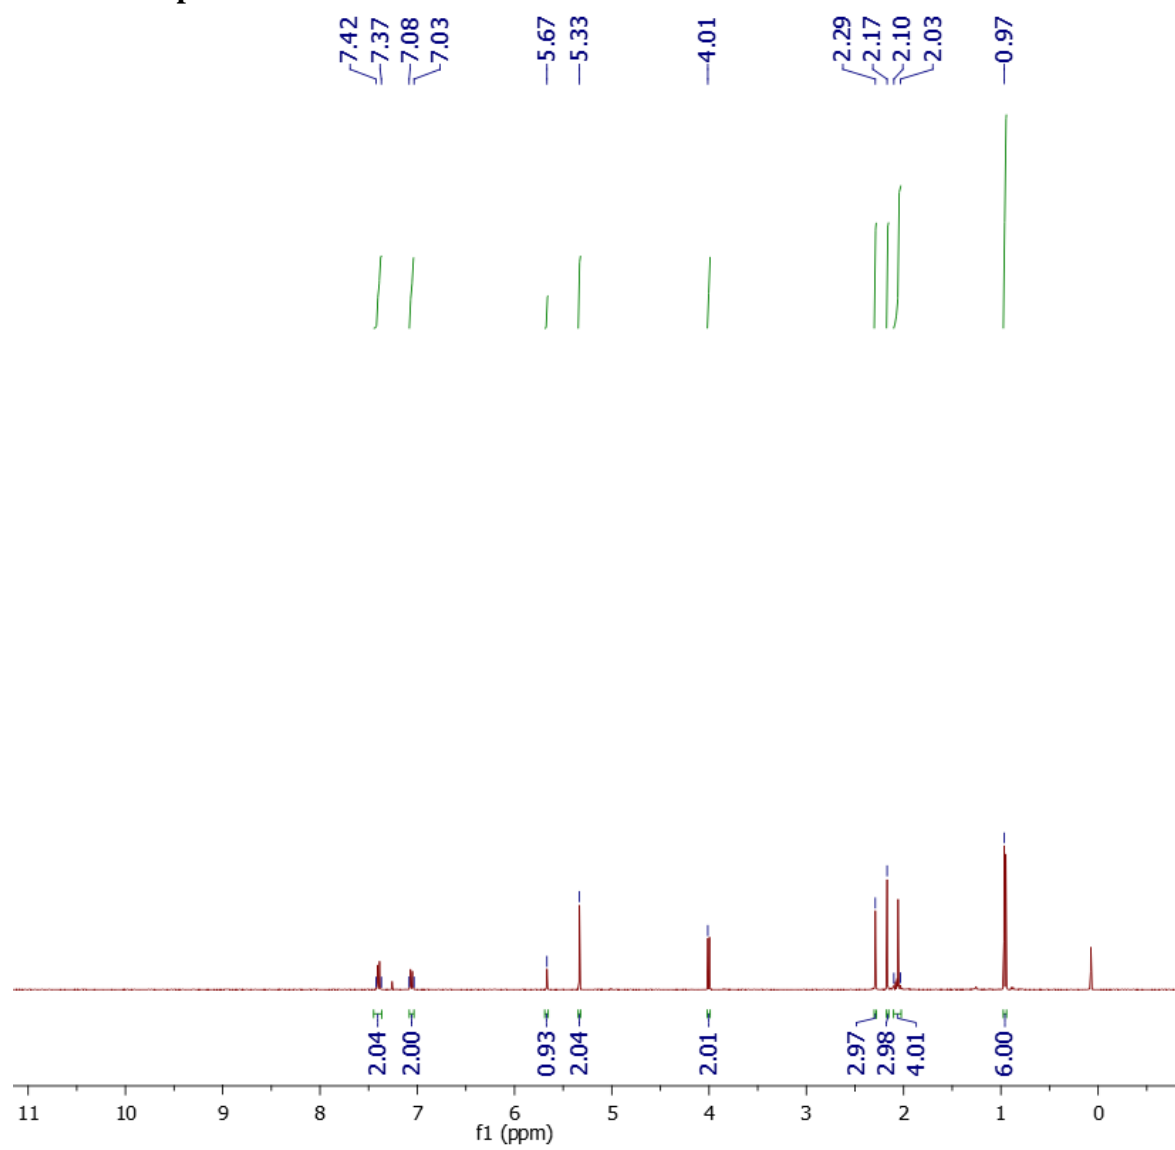

**Data 68.**  $^{13}\text{C}$ -NMR spectrum of compound **5e**

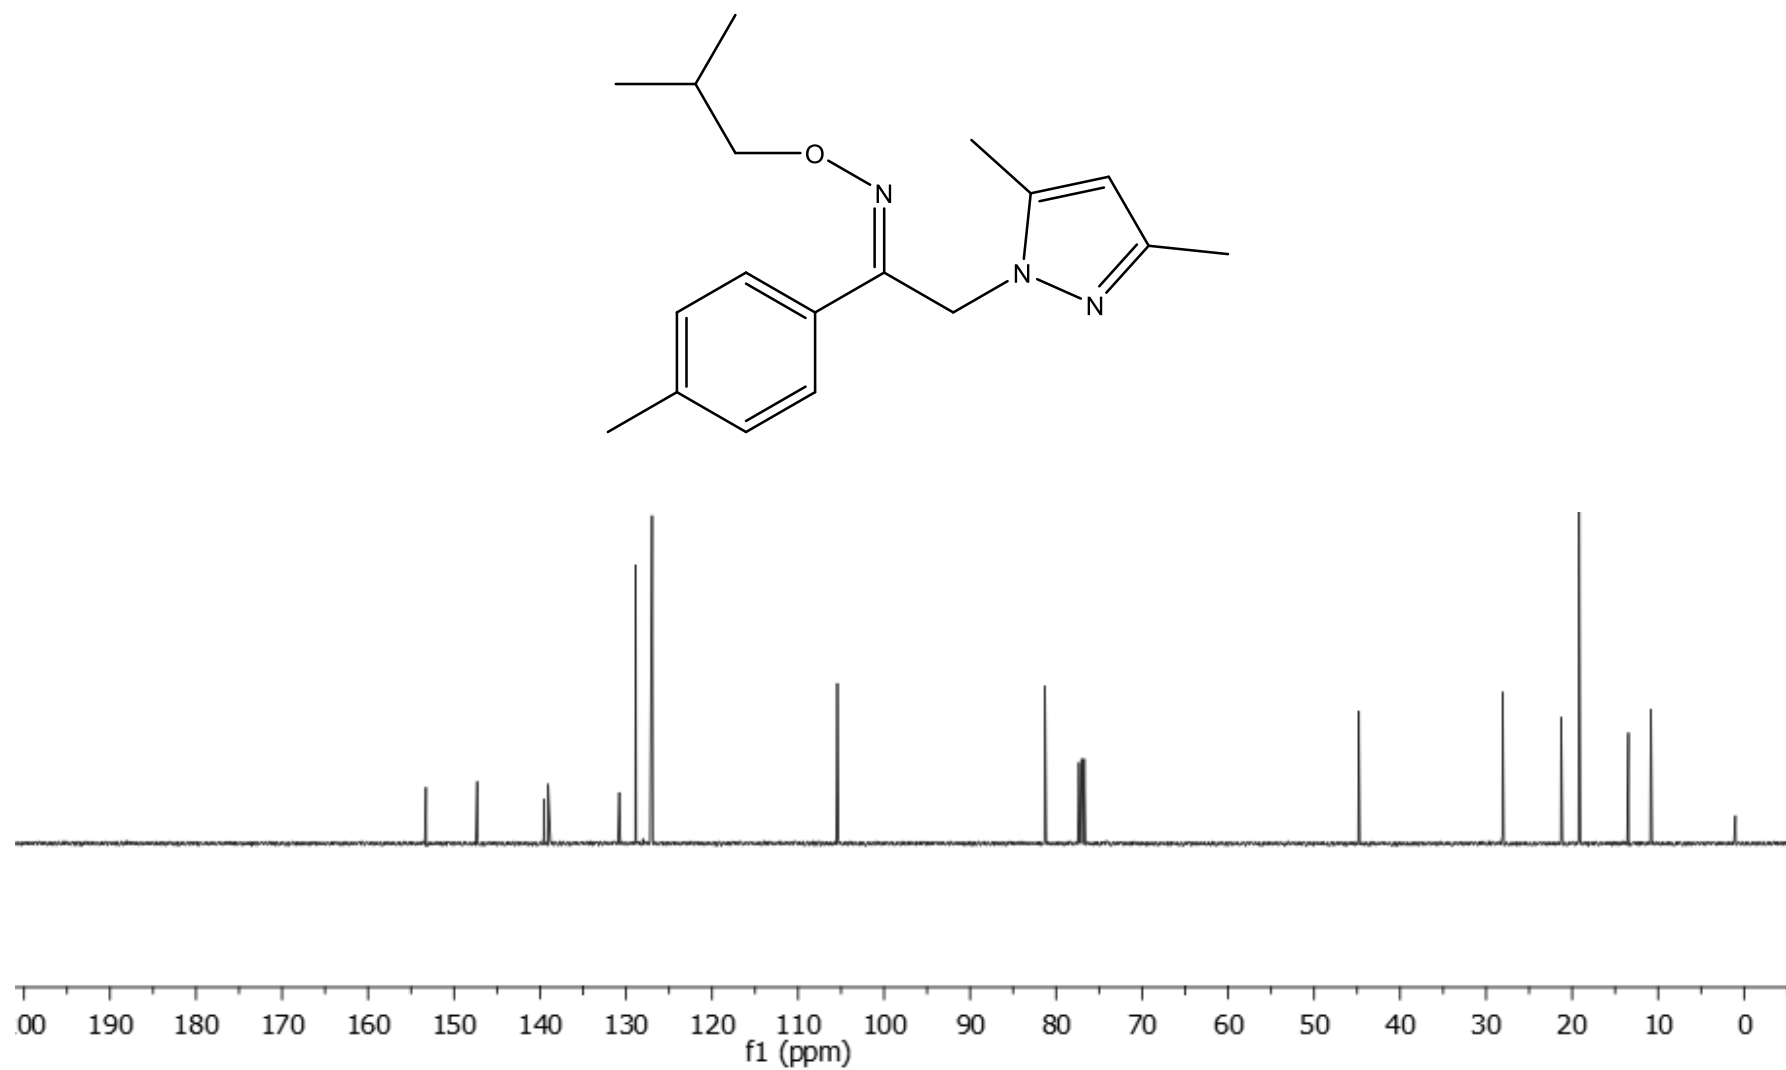

**Data 69. Mass spectrum of compound 5e**

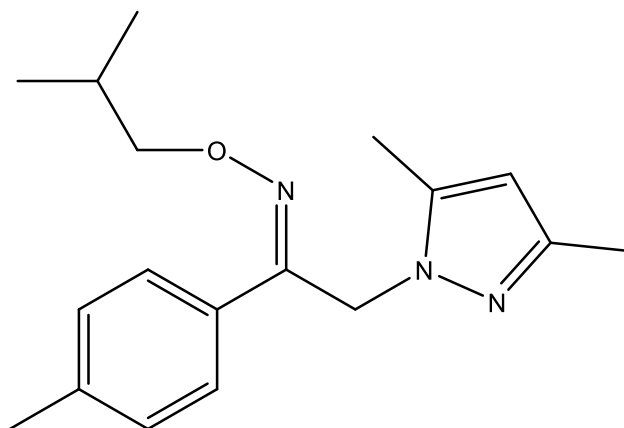

MEIB\_240616\_2 192 (7.499)

1: TOF MS ES+  
4.88e4

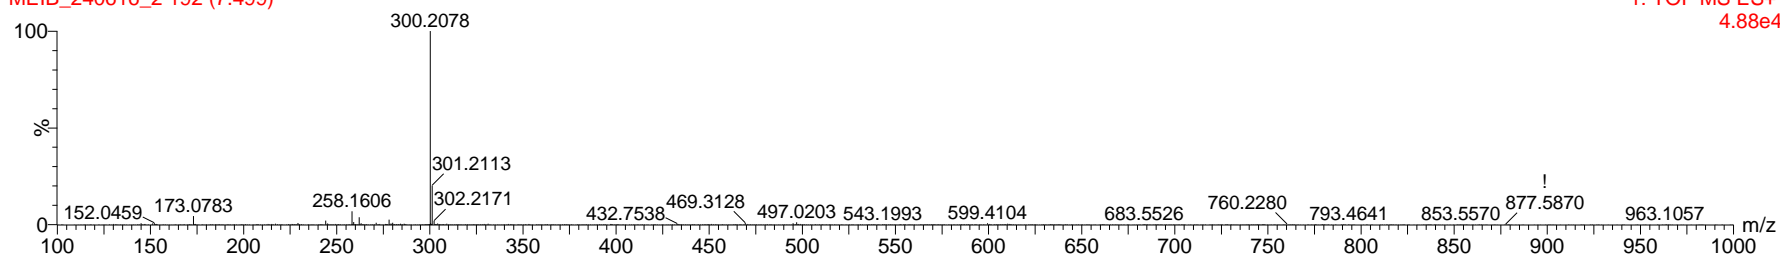

**Data 70.**  $^1\text{H}$ -NMR spectrum of compound **5f**

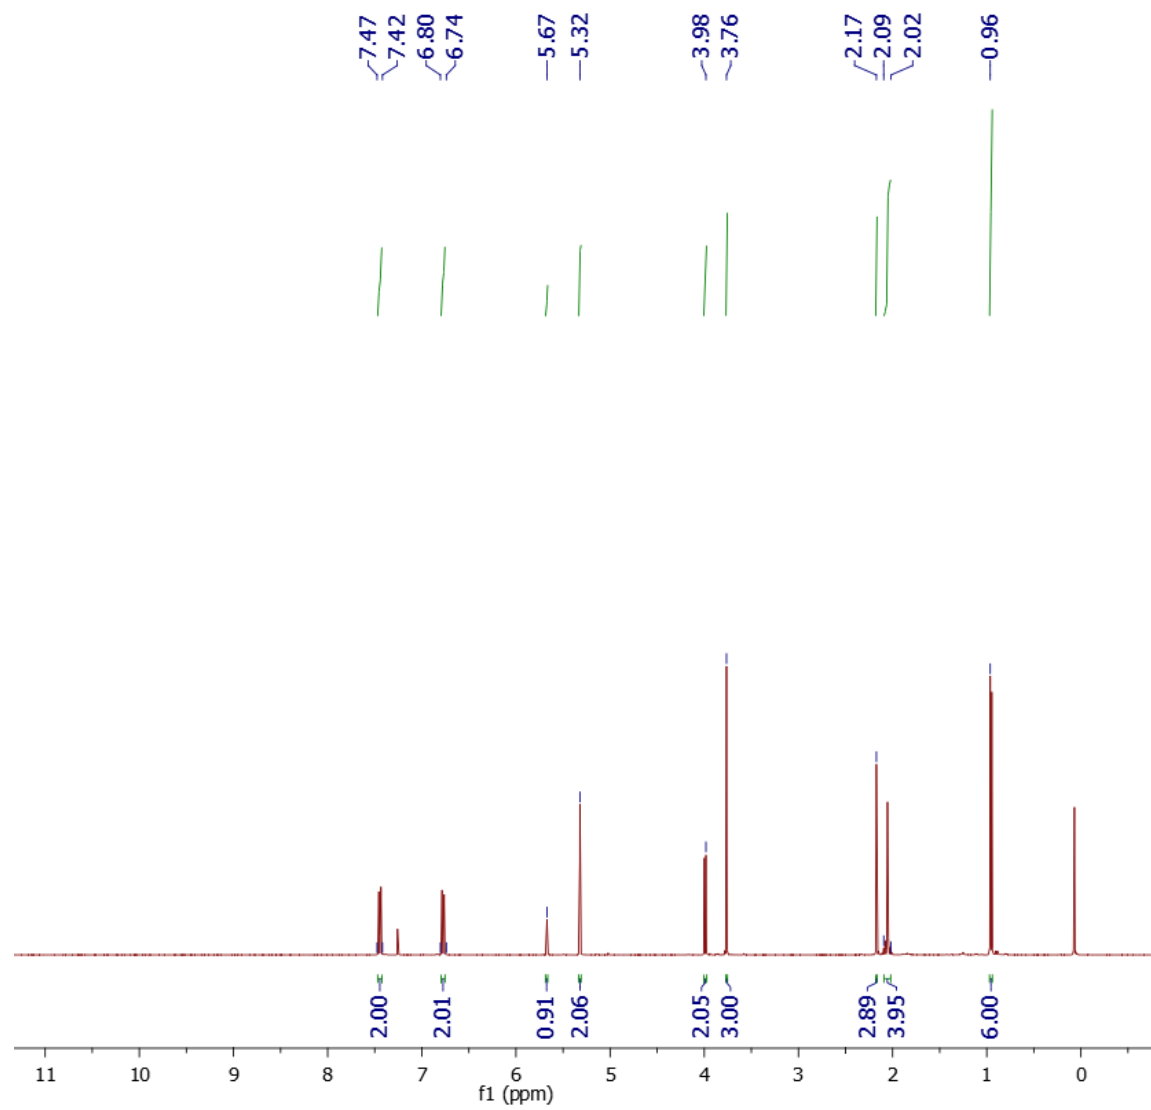



**Data 71.**  $^{13}\text{C}$ -NMR spectrum of compound 5f

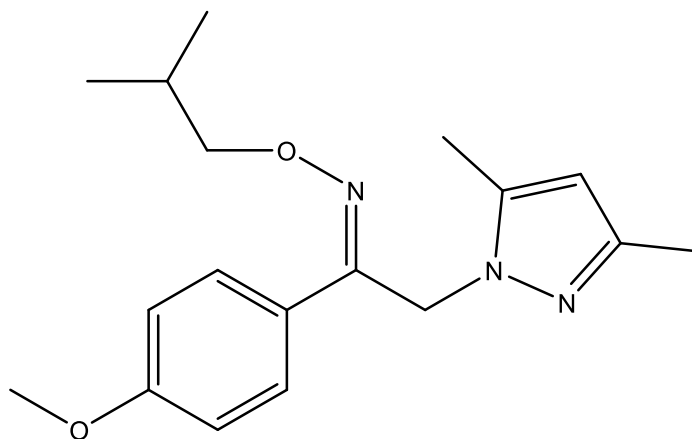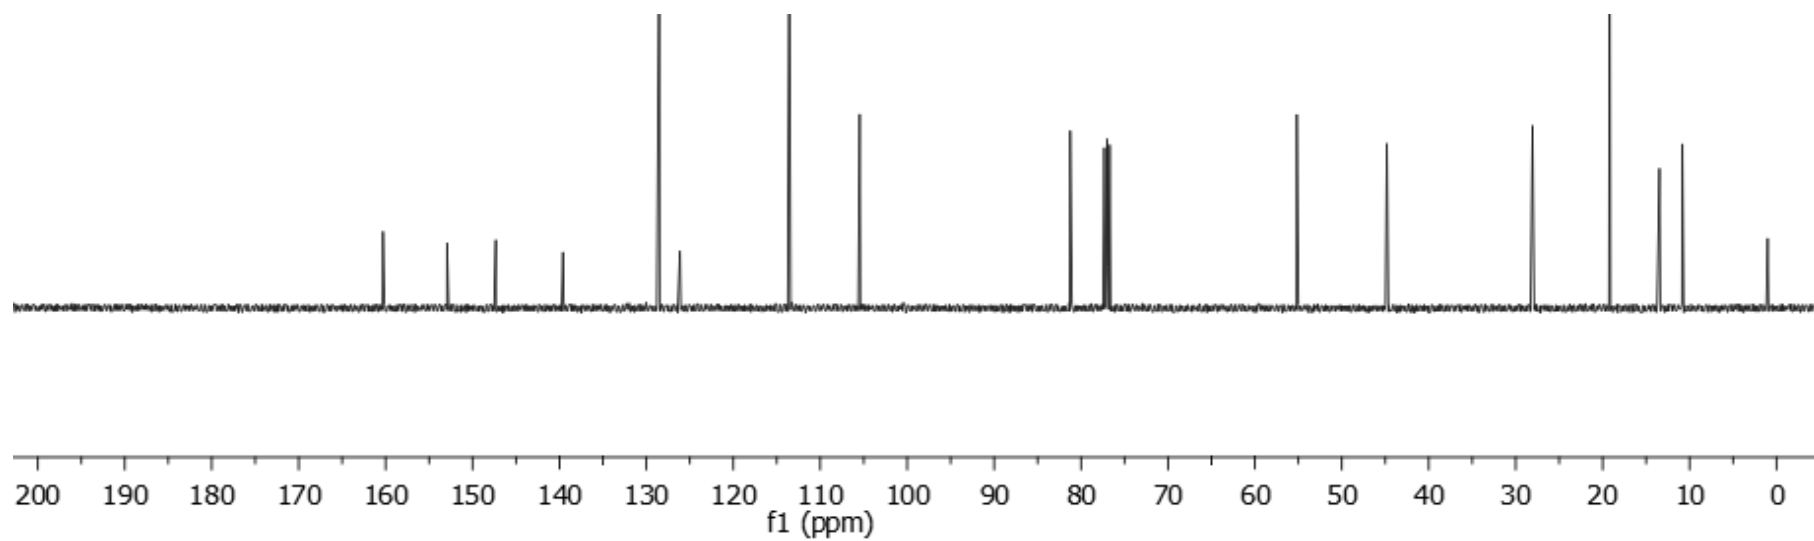

**Data 72. Mass spectrum of compound 5f**



MOIB\_200616\_2 203 (7.094)

1: TOF MS |  
1.0

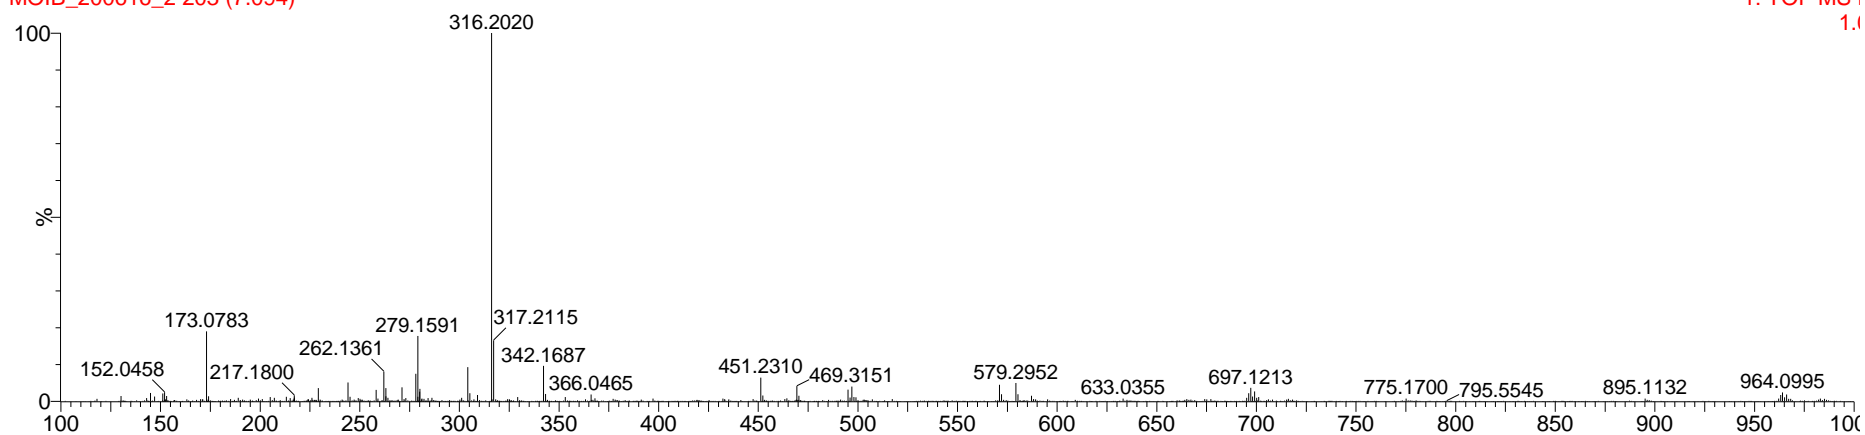

Supplement: s1 [file s1]
